# Supplementary material for: A retrospective study on beta-blocker use and outcomes in hematopoietic stem cell transplant patients
Source: PeerJ. 2025 Aug 8;13:e19822. doi: 10.7717/peerj.19822 (PMC12338055; doi:10.7717/peerj.19822)
Supplement: Supplemental Information 6 [file peerj-13-19822-s006.xlsx]

## Sheet: Sheet 1 - cohort_data4_reanalys
Pt_ID	Gender	Age_at_Tp	Donor_Type	Transplant_Date	Discharge_Date	Last_Contact_Date	Date_of_Death	Pt_Status	OS__1_death__0___alive_	Cause_of_Death__Classified	days_tp_fu	HCT_CI	Relapse_any	Relapse_date	days_tp_rel	hyper	bb_any	bb_before	bb_after	age_cat	race	hispanic	hctci_cat	los_m	event_os	time_os_m	event_nrm	time_nrm_m	event_rel	time_rel_m	agvhd_date	agvhd_grade	cgvhd_date	cgvhd_grade	BB_Type	cond_reg	ppx_CNI_MTX	ppx_PT_Cy	ppx_CNI_MMF	ppx_Campath	ppx_Other	tpdx	wt_pre	bmi_pre	wt_d90	bmi_d90	albumin_minus10_value	albumin_minus10_flag	albumin_minus10_days2tp
1	F	72	Unrelated	08/27/2010	12/08/2010	12/12/2010	12/12/2010	Dead	1	Infection	107	3	No			Unknown	BB Any No	BB Before No	BB After No	c.>=60	White	No	3	3.37705	1	3.5082	1	3.5082	0	3.5082						Non-myeloablative	0	0	0	1	0	MDS/MPN	158	25.44
2	F	61	Related	10/10/2018	12/13/2018	12/13/2018	12/13/2018	Dead	1	Infection	64	3	No			No	BB Any No	BB Before No	BB After No	c.>=60	White	No	3	2.09836	1	2.09836	1	2.09836	0	2.09836						Reduced Intensity	0	1	0	0	0	Acute Leukemia	147	24.21			2.2	L	-11
3	F	44	Unrelated	05/06/2015	10/08/2015	12/26/2015	12/26/2015	Dead	1	Recurrent or Persistent Disease	234	3	No			Yes	BB Any Yes	BB Before Yes	BB After Yes	b.40-59	White	No	3	5.08197	1	7.67213	1	7.67213	0	7.67213	06/04/2015	4			Metoprolol	Myeloablative	1	0	0	0	0	Lymphoma	179	31.68	153	24.88	4.1		-9
4	F	67	Related	01/15/2019		07/22/2019	07/22/2019	Dead	1		188	7	No			Yes	BB Any No	BB Before No	BB After No	c.>=60	White	No	4		1	6.16393	1	6.16393	0	6.16393	03/06/2019	4	06/15/2019	2		Myeloablative	1	0	0	0	0	Other	225	37.46	212	34.46	3.8		-12
5	M	59	Related	03/21/2017	06/16/2017	02/10/2020		Followup	0		1056	3	No			Unknown	BB Any No	BB Before No	BB After No	b.40-59	White	No	3	2.85246	0	34.623	0	34.623	0	34.623						Myeloablative	1	0	0	0	0	Acute Leukemia	186	28.93	145	22.54	4.2		-8
6	M	63	Unrelated	06/03/2015	08/04/2015	08/04/2015	08/04/2015	Dead	1	GVHD	62	4	No			Yes	BB Any Yes	BB Before No	BB After Yes	c.>=60	White	No	4	2.03279	1	2.03279	1	2.03279	0	2.03279	07/10/2015	4				Non-myeloablative	0	0	0	0	1	Acute Leukemia	209	30.2			3.7		-7
7	M	59	Unrelated	04/18/2013	06/27/2013	08/21/2014	08/21/2014	Dead	1	Infection	490	2	No			Yes	BB Any Yes	BB Before Yes	BB After Yes	b.40-59	White	No	2	2.29508	1	16.0656	1	16.0656	0	16.0656	05/06/2013	2	01/15/2014	2	Metoprolol	Myeloablative	1	0	0	0	0	MDS/MPN	192	29.82
8	M	54	Related	01/12/2017	01/26/2017	01/26/2017	01/26/2017	Dead	1	Infection	14	3	No			Unknown	BB Any No	BB Before No	BB After No	b.40-59	Black	No	3	0.459016	1	0.459016	1	0.459016	0	0.459016						Myeloablative	1	0	0	0	0	MDS/MPN	198	27.69			4.1		-9
9	M	51	Related	11/11/2014	03/17/2015	09/27/2018		Followup	0		1416	3	No			Unknown	BB Any No	BB Before No	BB After No	b.40-59	White	No	3	4.13115	0	46.4262	0	46.4262	0	46.4262	01/22/2015	1				Non-myeloablative	0	0	0	1	0	Chronic Leukemia	230	34.02	205	31.92	4.2		-8
10	F	53	Related	05/09/2012	08/20/2012	04/30/2013	04/30/2013	Dead	1	GVHD	356	5	No			Unknown	BB Any Yes	BB Before Yes	BB After No	b.40-59	Black	No	4	3.37705	1	11.6721	1	11.6721	0	11.6721	03/19/2013	4			Metoprolol	Non-myeloablative	0	0	0	1	0	Acute Leukemia	127	22.18
11	M	57	Unrelated	09/03/2014	10/29/2014	06/08/2017	06/08/2017	Dead	1	Recurrent or Persistent Disease	1009	6	No			Unknown	BB Any No	BB Before No	BB After No	b.40-59	Black	No	4	1.83607	1	33.082	1	33.082	0	33.082						Non-myeloablative	0	0	1	0	0	Lymphoma	242	34.24			3.9		-7
12	M	39	Unrelated	05/25/2016	07/27/2016	12/05/2016	12/05/2016	Dead	1	GVHD	194	3	No			Yes	BB Any Yes	BB Before Yes	BB After Yes	a.<=39	White	No	3	2.06557	1	6.36066	1	6.36066	0	6.36066	06/29/2016	2			Metoprolol	Non-myeloablative	0	0	1	0	0	Lymphoma	194	29.85	177	28.02	3.6		-8
13	M	59	Related	02/24/2016	03/16/2016	03/16/2016	03/16/2016	Dead	1	Infection	21	4	No			No	BB Any Yes	BB Before No	BB After Yes	b.40-59	White	No	4	0.688525	1	0.688525	1	0.688525	0	0.688525						Non-myeloablative	1	0	0	0	0	Acute Leukemia	209	27.37			4.2		-8
14	M	28	Related	01/13/2011	03/30/2011	03/30/2011	03/30/2011	Dead	1	Organ Failure	76	3	No			Unknown	BB Any No	BB Before No	BB After No	a.<=39	White	Yes	3	2.4918	1	2.4918	1	2.4918	0	2.4918	02/21/2011	2				Reduced Intensity	0	0	0	0	1	Acute Leukemia	146	21.93
15	M	65	Related	04/26/2012	06/06/2012	06/06/2012	06/06/2012	Dead	1	Organ Failure	41	5	No			Unknown	BB Any No	BB Before No	BB After No	c.>=60	White	No	4	1.34426	1	1.34426	1	1.34426	0	1.34426						Non-myeloablative	0	0	1	0	0	MDS/MPN	183	27.73
16	F	29	Unrelated	04/30/2010	06/17/2010	07/28/2011	07/28/2011	Dead	1	Infection	454	3	No			Unknown	BB Any No	BB Before No	BB After No	a.<=39	White	No	3	1.57377	1	14.8852	1	14.8852	0	14.8852	09/23/2010	3	12/29/2010	2		Non-myeloablative	0	0	0	1	0	Lymphoma	150	26.56
17	F	29	Related	11/17/2010	02/10/2011	11/14/2018		Followup	0		2919	2	No			Unknown	BB Any No	BB Before No	BB After No	a.<=39	White	No	2	2.78689	0	95.7049	0	95.7049	0	95.7049						Myeloablative	1	0	0	0	0	Chronic Leukemia	290	42.48
18	M	39	Related	04/05/2011	08/04/2011	03/06/2019		Followup	0		2892	0	No			Unknown	BB Any No	BB Before No	BB After No	a.<=39	Black	No	0	3.96721	0	94.8197	0	94.8197	0	94.8197	05/13/2011	2	04/28/2014	2		Myeloablative	1	0	0	0	0	Acute Leukemia	231	32.35
19	F	62	Related	10/12/2011	12/13/2011	09/28/2012	09/28/2012	Dead	1	Infection	352	3	No			Unknown	BB Any No	BB Before No	BB After No	c.>=60	White	No	3	2.03279	1	11.541	1	11.541	0	11.541	12/19/2011	2				Non-myeloablative	0	0	0	1	0	Lymphoma	149	25.54
20	M	56	Unrelated	11/12/2010	01/27/2011	06/24/2011	06/24/2011	Dead	1	Recurrent or Persistent Disease	224	4	No			Yes	BB Any Yes	BB Before No	BB After Yes	b.40-59	White	No	4	2.4918	1	7.34426	1	7.34426	0	7.34426	12/05/2010	2	03/11/2011	2		Myeloablative	1	0	0	0	0	Acute Leukemia	263	38.55
21	F	70	Related	01/13/2016	04/08/2016	06/23/2016	06/23/2016	Dead	1	Recurrent or Persistent Disease	162	4	No			Yes	BB Any Yes	BB Before No	BB After Yes	c.>=60	Black	No	4	2.81967	1	5.31148	1	5.31148	0	5.31148	02/10/2016	3				Non-myeloablative	0	1	0	0	0	MDS/MPN	151	26.65	149	26.91	4.3		-9
22	M	59	Unrelated	10/01/2014	12/07/2014	12/07/2014	12/07/2014	Dead	1	Infection	67	5	No			Yes	BB Any Yes	BB Before Yes	BB After Yes	b.40-59	White	No	4	2.19672	1	2.19672	1	2.19672	0	2.19672	11/25/2014	2			Carvedilol	Non-myeloablative	0	0	1	0	0	Lymphoma	173	24.53			2.9	L	-10
23	M	55	Unrelated	01/30/2014	03/09/2014	03/09/2014	03/09/2014	Dead	1	Infection	38	6	No			No	BB Any No	BB Before No	BB After No	b.40-59	White	No	4	1.2459	1	1.2459	1	1.2459	0	1.2459	02/05/2014	2				Non-myeloablative	1	0	0	0	0	Acute Leukemia	194	27.25			4.6		-8
24	F	45	Related	05/19/2010	09/14/2010	12/08/2010	12/08/2010	Dead	1	Infection	203	3	No			Unknown	BB Any No	BB Before No	BB After No	b.40-59	Black	No	3	3.86885	1	6.65574	1	6.65574	0	6.65574	06/14/2010	4				Non-myeloablative	0	0	0	1	0	Lymphoma	183	29.34
25	M	49	Unrelated	01/06/2012	04/06/2012	09/23/2022		Followup	0		3913	1	No			Yes	BB Any Yes	BB Before Yes	BB After Yes	b.40-59	Black	No	1	2.98361	0	128.295	0	128.295	0	128.295	06/07/2012	2	05/16/2012	2	Carvedilol	Myeloablative	0	0	1	0	0	MDS/MPN	166	26.68
26	F	49	Related	06/25/2010	09/14/2010	12/30/2011	12/30/2011	Dead	1	Infection	553	3	No			Unknown	BB Any No	BB Before No	BB After No	b.40-59	White	No	3	2.65574	1	18.1311	1	18.1311	0	18.1311	03/05/2011	1	04/09/2011	1		Myeloablative	1	0	0	0	0	Chronic Leukemia	145	25.63
27	F	47	Related	11/03/2010	03/16/2011	06/16/2011	06/16/2011	Dead	1	Infection	225	3	No			Unknown	BB Any No	BB Before No	BB After No	b.40-59	Black	No	3	4.36066	1	7.37705	1	7.37705	0	7.37705	12/12/2010	3	03/23/2011	2		Non-myeloablative	0	0	0	1	0	Acute Leukemia	227	38.77
28	M	59	Related	12/19/2016	03/31/2017	01/24/2022		Followup	0		1862	6	No			Yes	BB Any Yes	BB Before Yes	BB After Yes	b.40-59	White	No	4	3.34426	0	61.0492	0	61.0492	0	61.0492	01/13/2017	2			Carvedilol	Myeloablative	0	1	0	0	0	Lymphoma	196	26.55	168	22.81	4.3		-11
29	F	48	Related	05/05/2010	08/10/2010	05/21/2018		Followup	0		2938	4	No			Unknown	BB Any No	BB Before No	BB After No	b.40-59	White	No	4	3.18033	0	96.3279	0	96.3279	0	96.3279	06/04/2010	2	04/28/2014	2		Myeloablative	1	0	0	0	0	Acute Leukemia	136	22.63
30	F	47	Unrelated	12/01/2011	02/20/2012	04/17/2013	04/17/2013	Dead	1		503	4	No			Unknown	BB Any No	BB Before No	BB After No	b.40-59	White	No	4	2.65574	1	16.4918	1	16.4918	0	16.4918						Myeloablative	1	0	0	0	0	Acute Leukemia	196	31.46
31	M	63	Unrelated	02/10/2010	04/14/2010	07/23/2010	07/23/2010	Dead	1	Recurrent or Persistent Disease	163	2	No			Unknown	BB Any No	BB Before No	BB After No	c.>=60	White	No	2	2.06557	1	5.34426	1	5.34426	0	5.34426	03/10/2010	3				Non-myeloablative	0	0	0	1	0	Chronic Leukemia	185	27.33
32	F	22	Unrelated	03/31/2010	06/16/2010	02/27/2011	02/27/2011	Dead	1	Recurrent or Persistent Disease	333	3	No			Unknown	BB Any No	BB Before No	BB After No	a.<=39	White	No	3	2.52459	1	10.918	1	10.918	0	10.918	04/28/2010	2				Non-myeloablative	0	0	0	1	0	Lymphoma	160	21.71
33	F	58	Related	10/16/2013	12/03/2013	09/22/2014	09/22/2014	Dead	1	Infection	341	3	No			Unknown	BB Any No	BB Before No	BB After No	b.40-59	Black	No	3	1.57377	1	11.1803	1	11.1803	0	11.1803			04/14/2014	1		Non-myeloablative	0	0	1	0	0	Lymphoma	150	27.36
34	F	54	Related	01/14/2011	04/08/2011	11/06/2012	11/06/2012	Dead	1	Recurrent or Persistent Disease	662	4	No			Unknown	BB Any No	BB Before No	BB After No	b.40-59	Black	No	4	2.7541	1	21.7049	1	21.7049	0	21.7049	02/08/2011	2	09/26/2011	2		Myeloablative	1	0	0	0	0	Acute Leukemia	223	36.21
35	M	44	Unrelated	06/11/2013	09/12/2013	11/09/2014	11/09/2014	Dead	1	Recurrent or Persistent Disease	516	4	No			Unknown	BB Any No	BB Before No	BB After No	b.40-59	White	No	4	3.04918	1	16.918	1	16.918	0	16.918	12/19/2013	3	04/02/2014	1		Myeloablative	1	0	0	0	0	MDS/MPN	226	33.12
36	M	61	Unrelated	05/19/2010	08/23/2010	06/09/2011	06/09/2011	Dead	1	Infection	386	3	No			Unknown	BB Any No	BB Before No	BB After No	c.>=60	White	No	3	3.14754	1	12.6557	1	12.6557	0	12.6557	06/10/2010	2	01/18/2011	2		Non-myeloablative	0	0	0	1	0	Chronic Leukemia	170	26.64
37	F	55	Related	01/27/2010	03/25/2010	10/16/2018		Followup	0		3184	1	No			Unknown	BB Any No	BB Before No	BB After No	b.40-59	White	No	1	1.86885	0	104.393	0	104.393	0	104.393	07/22/2010	2	05/05/2011	2		Non-myeloablative	0	0	1	0	0	MDS/MPN	159	23.81
38	F	67	Related	01/27/2010	03/25/2010	06/12/2018		Followup	0		3058	2	No			Unknown	BB Any No	BB Before No	BB After No	c.>=60	White	No	2	1.86885	0	100.262	0	100.262	0	100.262			12/17/2012	2		Non-myeloablative	0	0	0	1	0	Chronic Leukemia	148	25.18
39	F	56	Related	05/18/2018	08/15/2018	12/06/2018	12/06/2018	Dead	1		202	2	No			Unknown	BB Any No	BB Before No	BB After No	b.40-59	White	No	2	2.91803	1	6.62295	1	6.62295	0	6.62295	06/08/2018	1	11/21/2018	2		Myeloablative	0	1	0	0	0	Acute Leukemia	155	25.67	156	25.47	4.4		-9
40	M	54	Related	08/29/2012	11/26/2012	03/19/2013	03/19/2013	Dead	1	Organ Failure	202	2	No			Unknown	BB Any No	BB Before No	BB After No	b.40-59	White	No	2	2.91803	1	6.62295	1	6.62295	0	6.62295	02/28/2013	3				Non-myeloablative	0	0	0	1	0	Acute Leukemia	200	27.87
41	M	27	Related	01/27/2010	04/12/2010	12/01/2012	12/01/2012	Dead	1	GVHD	1039	3	No			Unknown	BB Any No	BB Before No	BB After No	a.<=39	White	No	3	2.45902	1	34.0656	1	34.0656	0	34.0656	03/10/2010	3	07/26/2010	2		Non-myeloablative	0	0	0	1	0	Lymphoma	146	23.95
42	M	67	Related	01/13/2010	03/29/2010	08/05/2010	08/05/2010	Dead	1	Organ Failure	204	5	No			Unknown	BB Any No	BB Before No	BB After No	c.>=60	White	No	4	2.45902	1	6.68852	1	6.68852	0	6.68852						Non-myeloablative	0	0	0	0	1	MDS/MPN	198	28.37
43	M	49	Unrelated	01/29/2010	05/26/2010	07/02/2012	07/02/2012	Dead	1	Recurrent or Persistent Disease	885	3	No			Unknown	BB Any No	BB Before No	BB After No	b.40-59	White	Yes	3	3.83607	1	29.0164	1	29.0164	0	29.0164	02/16/2010	1	08/01/2010	1		Myeloablative	0	0	1	0	0	Chronic Leukemia	166	25.82
44	M	55	Unrelated	05/28/2010	07/20/2010	03/10/2011	03/10/2011	Dead	1	Recurrent or Persistent Disease	286	3	No			Unknown	BB Any No	BB Before No	BB After No	b.40-59	White	No	3	1.7377	1	9.37705	1	9.37705	0	9.37705	07/06/2010	2				Non-myeloablative	0	0	0	1	0	Lymphoma	169	23.38
45	M	33	Unrelated	03/01/2011	06/03/2011	03/06/2019		Followup	0		2927	2	No			Unknown	BB Any No	BB Before No	BB After No	a.<=39	Black	No	2	3.08197	0	95.9672	0	95.9672	0	95.9672	04/21/2011	2	09/15/2011	2		Myeloablative	1	0	0	0	0	Acute Leukemia	228	28.7
46	M	28	Related	01/05/2010	04/09/2010	06/11/2018		Followup	0		3079	3	No			Unknown	BB Any No	BB Before No	BB After No	a.<=39	White	No	3	3.08197	0	100.951	0	100.951	0	100.951						Non-myeloablative	0	0	0	1	0	Acute Leukemia	213	29.22
47	F	70	Unrelated	05/28/2010	09/08/2010	12/12/2010	12/12/2010	Dead	1	Recurrent or Persistent Disease	198	2	No			Unknown	BB Any No	BB Before No	BB After No	c.>=60	White	No	2	3.37705	1	6.4918	1	6.4918	0	6.4918	07/21/2010	1				Non-myeloablative	0	0	0	1	0	MDS/MPN	141	22.58
48	M	56	Unrelated	05/11/2011	09/23/2011	03/01/2015	03/01/2015	Dead	1	Recurrent or Persistent Disease	1390	4	No			Unknown	BB Any No	BB Before No	BB After No	b.40-59	z.Other/Unknown	No	4	4.42623	1	45.5738	1	45.5738	0	45.5738	06/09/2011	3				Myeloablative	0	0	1	0	0	MDS/MPN	137	20.78
49	M	46	Related	06/30/2010	08/13/2010	01/19/2011	01/19/2011	Dead	1	Infection	203	3	No			Unknown	BB Any No	BB Before No	BB After No	b.40-59	White	No	3	1.44262	1	6.65574	1	6.65574	0	6.65574	12/01/2010	1				Non-myeloablative	0	0	0	1	0	Lymphoma	188	27.79
50	F	52	Related	03/31/2010	06/24/2010	02/22/2018		Followup	0		2885	6	No			Unknown	BB Any No	BB Before No	BB After No	b.40-59	White	No	4	2.78689	0	94.5902	0	94.5902	0	94.5902			11/07/2010	2		Non-myeloablative	0	0	0	1	0	Chronic Leukemia	177	32.5
51	M	21	Unrelated	07/07/2010	08/27/2010	12/17/2011	12/17/2011	Dead	1	Recurrent or Persistent Disease	528	4	No			Unknown	BB Any No	BB Before No	BB After No	a.<=39	White	No	4	1.67213	1	17.3115	1	17.3115	0	17.3115			10/22/2010	1		Non-myeloablative	0	0	1	0	0	Lymphoma	158	22.85
52	M	39	Unrelated	01/15/2010	04/19/2010	03/03/2017		Followup	0		2604	4	No			Unknown	BB Any No	BB Before No	BB After No	a.<=39	White	No	4	3.08197	0	85.377	0	85.377	0	85.377	01/28/2010	2				Myeloablative	0	0	1	0	0	MDS/MPN	201	29.44
53	F	60	Unrelated	01/20/2010	04/02/2010	01/24/2018		Followup	0		2926	2	No			Unknown	BB Any No	BB Before No	BB After No	c.>=60	White	No	2	2.36066	0	95.9344	0	95.9344	0	95.9344	03/10/2010	2				Non-myeloablative	0	0	0	1	0	Acute Leukemia	189	31.52
54	M	41	Unrelated	03/31/2010	08/06/2010	10/13/2010	10/13/2010	Dead	1	Recurrent or Persistent Disease	196	4	No			Unknown	BB Any No	BB Before No	BB After No	b.40-59	White	No	4	4.19672	1	6.42623	1	6.42623	0	6.42623	06/10/2010	2	07/10/2010	2		Myeloablative	1	0	0	0	0	Acute Leukemia	167	24.72
55	M	57	Related	01/13/2010	02/26/2010	09/05/2010	09/05/2010	Dead	1	Recurrent or Persistent Disease	235	4	No			Unknown	BB Any No	BB Before No	BB After No	b.40-59	White	No	4	1.44262	1	7.70492	1	7.70492	0	7.70492	02/08/2010	2				Non-myeloablative	0	0	0	1	0	Lymphoma	227	35.16
56	M	72	Unrelated	04/10/2010	06/14/2010	10/24/2010	10/24/2010	Dead	1	Infection	197	3	No			Unknown	BB Any No	BB Before No	BB After No	c.>=60	White	No	3	2.13115	1	6.45902	1	6.45902	0	6.45902	07/22/2010	3				Non-myeloablative	0	0	0	1	0	MDS/MPN	174	26.13
57	F	45	Unrelated	07/29/2010	11/09/2010	03/17/2015		Followup	0		1692	2	No			Unknown	BB Any No	BB Before No	BB After No	b.40-59	White	No	2	3.37705	0	55.4754	0	55.4754	0	55.4754	08/27/2010	1	09/07/2011	2		Myeloablative	1	0	0	0	0	Acute Leukemia	207	33.74
58	F	52	Unrelated	07/06/2011	09/30/2011	05/13/2013	05/13/2013	Dead	1	Recurrent or Persistent Disease	677	4	No			Unknown	BB Any No	BB Before No	BB After No	b.40-59	White	Yes	4	2.81967	1	22.1967	1	22.1967	0	22.1967	10/17/2011	1	06/11/2012	2		Myeloablative	1	0	0	0	0	Acute Leukemia	140	23.82
59	M	61	Unrelated	03/17/2010	05/26/2010	08/10/2011	08/10/2011	Dead	1	Recurrent or Persistent Disease	511	3	No			Unknown	BB Any No	BB Before No	BB After No	c.>=60	White	No	3	2.29508	1	16.7541	1	16.7541	0	16.7541	05/12/2010	1				Non-myeloablative	1	0	0	0	0	Acute Leukemia	247	30.92
60	M	50	Unrelated	03/23/2010	05/27/2010	07/29/2013	07/29/2013	Dead	1	Recurrent or Persistent Disease	1224	7	Yes	29MAR2013	1102	Unknown	BB Any No	BB Before No	BB After No	b.40-59	Black	No	4	2.13115	1	40.1311	0	36.1311	1	36.1311	04/26/2010	2				Non-myeloablative	0	0	1	0	0	Acute Leukemia	218	28.77
61	M	46	Unrelated	08/20/2010	11/18/2010	04/22/2016		Followup	0		2072	3	No			Unknown	BB Any No	BB Before No	BB After No	b.40-59	White	No	3	2.95082	0	67.9344	0	67.9344	0	67.9344	09/10/2010	2	02/10/2011	1		Myeloablative	0	0	1	0	0	Chronic Leukemia	133	21.85
62	F	56	Related	02/09/2011	05/06/2011	03/25/2012	03/25/2012	Dead	1	Infection	410	7	No			Unknown	BB Any No	BB Before No	BB After No	b.40-59	White	No	4	2.81967	1	13.4426	1	13.4426	0	13.4426	08/22/2011	2	08/10/2011	2		Non-myeloablative	0	0	0	1	0	Chronic Leukemia	202	34.94
63	M	36	Unrelated	03/24/2010	06/25/2010	02/18/2011	02/18/2011	Dead	1	Recurrent or Persistent Disease	331	2	No			Unknown	BB Any No	BB Before No	BB After No	a.<=39	Black	No	2	3.04918	1	10.8525	1	10.8525	0	10.8525	04/07/2010	3	08/19/2010	2		Myeloablative	0	0	1	0	0	Acute Leukemia
64	M	52	Related	05/25/2010	07/23/2010	02/01/2011	02/01/2011	Dead	1	Recurrent or Persistent Disease	252	3	No			Unknown	BB Any No	BB Before No	BB After No	b.40-59	White	No	3	1.93443	1	8.2623	1	8.2623	0	8.2623						Non-myeloablative	1	0	0	0	0	Lymphoma	189	23.55
65	F	45	Unrelated	08/31/2016	03/21/2017	03/21/2017	03/21/2017	Dead	1	Organ Failure	202	5	No			Unknown	BB Any No	BB Before No	BB After No	b.40-59	White	No	4	6.62295	1	6.62295	1	6.62295	0	6.62295	09/17/2016	2				Myeloablative	1	0	0	0	0	Acute Leukemia	209	35.33	185	31.74	3.6		-9
66	F	25	Unrelated	02/10/2010	06/01/2010	08/02/2018		Followup	0		3095	3	No			Unknown	BB Any No	BB Before No	BB After No	a.<=39	White	No	3	3.63934	0	101.475	0	101.475	0	101.475						Myeloablative	0	0	0	0	1	Acute Leukemia	165	28.64
67	F	58	Related	09/22/2010	11/04/2010	11/04/2010	11/04/2010	Dead	1	Infection	43	3	No			Unknown	BB Any No	BB Before No	BB After No	b.40-59	Black	No	3	1.40984	1	1.40984	1	1.40984	0	1.40984	10/12/2010	4				Non-myeloablative	0	0	0	1	0	Chronic Leukemia	168	29.95
68	F	51	Unrelated	03/03/2010	05/25/2010	02/07/2018		Followup	0		2898	2	No			Unknown	BB Any No	BB Before No	BB After No	b.40-59	White	No	2	2.72131	0	95.0164	0	95.0164	0	95.0164	03/30/2010	1	06/07/2010	1		Myeloablative	0	0	1	0	0	Chronic Leukemia	201	32.63
69	M	55	Unrelated	03/31/2010	06/24/2010	05/24/2013	05/24/2013	Dead	1	Recurrent or Persistent Disease	1150	3	No			Unknown	BB Any No	BB Before No	BB After No	b.40-59	White	No	3	2.78689	1	37.7049	1	37.7049	0	37.7049	04/27/2010	2				Myeloablative	1	0	0	0	0	MDS/MPN	182	27.57
70	F	67	Related	04/01/2010	06/15/2010	06/16/2010	06/16/2010	Dead	1	GVHD	76	4	No			Unknown	BB Any No	BB Before No	BB After No	c.>=60	White	No	4	2.45902	1	2.4918	1	2.4918	0	2.4918	04/23/2010	4				Non-myeloablative	0	0	0	1	0	Acute Leukemia	208	36.8
71	M	52	Unrelated	04/28/2010	08/25/2010	02/28/2011	02/28/2011	Dead	1	Infection	306	5	No			Unknown	BB Any No	BB Before No	BB After No	b.40-59	White	No	4	3.90164	1	10.0328	1	10.0328	0	10.0328	05/11/2010	1	12/09/2010	3		Myeloablative	0	0	1	0	0	Acute Leukemia	235	29.56
72	M	28	Unrelated	07/21/2010	11/18/2010	10/07/2014	10/07/2014	Dead	1	Recurrent or Persistent Disease	1539	2	Yes	27JAN2011	190	No	BB Any Yes	BB Before Yes	BB After Yes	a.<=39	Black	No	2	3.93443	1	50.459	0	6.22951	1	6.22951					Metoprolol	Myeloablative	0	0	1	0	0	Chronic Leukemia	242	32.79
73	F	51	Related	06/16/2010	10/12/2010	02/24/2012	02/24/2012	Dead	1	Other/Unknown	618	2	No			Unknown	BB Any No	BB Before No	BB After No	b.40-59	Black	No	2	3.86885	1	20.2623	1	20.2623	0	20.2623	07/19/2010	3	10/15/2010	1		Non-myeloablative	0	0	0	1	0	Other	150	23.49
74	M	51	Unrelated	03/23/2011	06/20/2011	06/27/2019		Followup	0		3018	2	No			Unknown	BB Any No	BB Before No	BB After No	b.40-59	White	No	2	2.91803	0	98.9508	0	98.9508	0	98.9508	05/04/2011	3	10/28/2013	2		Myeloablative	1	0	0	0	0	MDS/MPN	258	33.4
75	M	53	Unrelated	02/20/2013	05/21/2013	01/07/2019		Followup	0		2147	3	No			Unknown	BB Any No	BB Before No	BB After No	b.40-59	White	No	3	2.95082	0	70.3934	0	70.3934	0	70.3934	04/03/2013	3	12/05/2013	2		Myeloablative	1	0	0	0	0	MDS/MPN	198	28
76	F	35	Unrelated	02/17/2011	05/20/2011	09/26/2011	09/26/2011	Dead	1	Organ Failure	221	5	No			Unknown	BB Any No	BB Before No	BB After No	a.<=39	White	No	4	3.01639	1	7.2459	1	7.2459	0	7.2459	04/12/2011	1	07/15/2011	2		Non-myeloablative	0	0	1	0	0	Acute Leukemia	257	38.55
77	M	40	Related	05/06/2014	08/06/2014	04/01/2019		Followup	0		1791	2	No			Unknown	BB Any No	BB Before No	BB After No	b.40-59	White	No	2	3.01639	0	58.7213	0	58.7213	0	58.7213	10/02/2014	3	04/17/2015	2		Myeloablative	1	0	0	0	0	Lymphoma	265	32.22	221	26.9	4.2		-12
78	F	54	Unrelated	03/16/2010	04/13/2010	04/13/2010	04/13/2010	Dead	1		28	5	No			Unknown	BB Any No	BB Before No	BB After No	b.40-59	White	No	4	0.918033	1	0.918033	1	0.918033	0	0.918033						Non-myeloablative	1	0	0	0	0	Other	181	31.21
79	M	55	Related	01/26/2012	04/19/2012	02/13/2013	02/13/2013	Dead	1	Recurrent or Persistent Disease	384	3	Yes	03JAN2013	343	Unknown	BB Any No	BB Before No	BB After No	b.40-59	White	No	3	2.7541	1	12.5902	0	11.2459	1	11.2459						Myeloablative	1	0	0	0	0	MDS/MPN	188	25.44
80	F	52	Unrelated	03/09/2010	06/03/2010	02/15/2018		Followup	0		2900	7	No			Unknown	BB Any No	BB Before No	BB After No	b.40-59	White	No	4	2.81967	0	95.082	0	95.082	0	95.082	03/30/2010	2	12/09/2010	2		Myeloablative	1	0	0	0	0	Acute Leukemia	112	19.04
81	M	53	Unrelated	06/02/2010	09/03/2010	05/04/2017	05/04/2017	Dead	1	Other/Unknown	2528	2	No			Unknown	BB Any No	BB Before No	BB After No	b.40-59	White	No	2	3.04918	1	82.8852	1	82.8852	0	82.8852			02/20/2015	2		Myeloablative	1	0	0	0	0	Acute Leukemia	165	22.12
82	F	55	Related	04/20/2010	07/27/2010	06/06/2018		Followup	0		2969	2	No			Unknown	BB Any No	BB Before No	BB After No	b.40-59	White	No	2	3.21311	0	97.3443	0	97.3443	0	97.3443			01/06/2012	2		Myeloablative	1	0	0	0	0	Acute Leukemia	104	18.4
83	M	23	Unrelated	04/22/2010	07/15/2010	05/23/2012		Followup	0		762	1	No			Unknown	BB Any No	BB Before No	BB After No	a.<=39	White	No	1	2.7541	0	24.9836	0	24.9836	0	24.9836	09/03/2010	1	09/03/2010	1		Myeloablative	0	0	1	0	0	Acute Leukemia	254	36.5
84	M	55	Related	06/14/2011	08/12/2011	05/29/2012	05/29/2012	Dead	1	Infection	350	9	No			Unknown	BB Any No	BB Before No	BB After No	b.40-59	White	No	4	1.93443	1	11.4754	1	11.4754	0	11.4754	11/21/2011	2				Non-myeloablative	0	0	0	1	0	Acute Leukemia	169	26.89
85	F	43	Unrelated	06/16/2010	09/10/2010	06/25/2018		Followup	0		2931	2	No			Unknown	BB Any No	BB Before No	BB After No	b.40-59	White	No	2	2.81967	0	96.0984	0	96.0984	0	96.0984	07/14/2010	2	11/17/2010	2		Myeloablative	1	0	0	0	0	Acute Leukemia	183	34.46
86	M	52	Related	06/09/2010	07/01/2010	07/01/2010	07/01/2010	Dead	1	Infection	22	6	No			Unknown	BB Any No	BB Before No	BB After No	b.40-59	White	No	4	0.721311	1	0.721311	1	0.721311	0	0.721311						Non-myeloablative	0	0	0	1	0	Acute Leukemia	162	22.04
87	F	59	Related	07/20/2010	10/29/2010	03/20/2011	03/20/2011	Dead	1	GVHD	243	7	No			Yes	BB Any Yes	BB Before Yes	BB After No	b.40-59	White	No	4	3.31148	1	7.96721	1	7.96721	0	7.96721			01/21/2011	1	Metoprolol	Non-myeloablative	0	0	0	1	0	Acute Leukemia	170	30.46
88	F	60	Related	05/05/2010	07/27/2010	05/31/2018		Followup	0		2948	3	No			Unknown	BB Any No	BB Before No	BB After No	c.>=60	White	No	3	2.72131	0	96.6557	0	96.6557	0	96.6557	05/31/2010	2				Non-myeloablative	0	0	0	1	0	Acute Leukemia	166	28.34
89	F	33	Unrelated	05/07/2010	09/21/2010	09/21/2010	09/21/2010	Dead	1	Infection	137	4	No			Unknown	BB Any No	BB Before No	BB After No	a.<=39	Black	No	4	4.4918	1	4.4918	1	4.4918	0	4.4918	05/23/2010	3	09/13/2010	2		Myeloablative	0	0	1	0	0	Acute Leukemia	213	38.29
90	F	40	Related	05/04/2011	07/19/2011	04/12/2019		Followup	0		2900	3	No			Unknown	BB Any No	BB Before No	BB After No	b.40-59	White	No	3	2.4918	0	95.082	0	95.082	0	95.082	01/27/2012	1				Non-myeloablative	0	0	0	1	0	Lymphoma	159	24.34
91	M	64	Related	05/12/2010	08/12/2010	09/02/2011	09/02/2011	Dead	1	Recurrent or Persistent Disease	478	3	No			Unknown	BB Any No	BB Before No	BB After No	c.>=60	White	No	3	3.01639	1	15.6721	1	15.6721	0	15.6721						Non-myeloablative	0	0	1	0	0	Lymphoma	191	31.39
92	M	27	Related	07/13/2010	09/13/2010	09/10/2019		Followup	0		3346	4	No			Unknown	BB Any No	BB Before No	BB After No	a.<=39	Black	No	4	2.03279	0	109.705	0	109.705	0	109.705	05/15/2018	2				Non-myeloablative	0	0	0	1	0	Other	172	25.5
93	F	52	Unrelated	06/23/2010	09/20/2010	01/10/2011	01/10/2011	Dead	1	Infection	201	1	Yes	19AUG2010	57	Unknown	BB Any No	BB Before No	BB After No	b.40-59	White	No	1	2.91803	1	6.59016	0	1.86885	1	1.86885	07/08/2010	3				Myeloablative	0	0	1	0	0	Acute Leukemia	125	21.42
94	F	39	Unrelated	06/22/2010	09/15/2010	01/14/2013	01/14/2013	Dead	1	Infection	937	3	No			Unknown	BB Any No	BB Before No	BB After No	a.<=39	White	No	3	2.78689	1	30.7213	1	30.7213	0	30.7213	11/08/2010	1	08/22/2011	2		Myeloablative	1	0	0	0	0	Acute Leukemia	285	44.78
95	M	51	Related	09/22/2010	12/30/2010	03/08/2018	03/08/2018	Dead	1	Organ Failure	2724	3	No			Unknown	BB Any No	BB Before No	BB After No	b.40-59	z.Other/Unknown	No	3	3.2459	1	89.3115	1	89.3115	0	89.3115	11/18/2010	2	03/24/2011	2		Myeloablative	1	0	0	0	0	MDS/MPN	135	21.39
96	M	67	Unrelated	08/17/2010	09/30/2010	04/10/2018	04/10/2018	Dead	1	Other/Unknown	2793	2	No			Unknown	BB Any Yes	BB Before Yes	BB After Yes	c.>=60	White	No	2	1.44262	1	91.5738	1	91.5738	0	91.5738					Metoprolol	Non-myeloablative	0	0	0	1	0	MDS/MPN	184	26.29
97	F	61	Related	08/04/2010	10/07/2010	12/01/2012	12/01/2012	Dead	1	Organ Failure	850	3	No			Unknown	BB Any No	BB Before No	BB After No	c.>=60	White	No	3	2.09836	1	27.8689	1	27.8689	0	27.8689	09/30/2010	3	01/10/2011	2		Non-myeloablative	0	0	0	1	0	Acute Leukemia	216	33.16
98	M	19	Unrelated	04/13/2011	07/07/2011	07/07/2011	07/07/2011	Dead	1	Infection	85	4	No			Unknown	BB Any Yes	BB Before Yes	BB After Yes	a.<=39	Black	No	4	2.78689	1	2.78689	1	2.78689	0	2.78689					btype_other	Myeloablative	0	0	1	0	0	Acute Leukemia	372	52.04
99	F	42	Unrelated	07/09/2010	10/07/2010	05/14/2011	05/14/2011	Dead	1	Recurrent or Persistent Disease	309	2	Yes	22NOV2010	136	Unknown	BB Any No	BB Before No	BB After No	b.40-59	White	No	2	2.95082	1	10.1311	0	4.45902	1	4.45902	09/02/2010	1				Myeloablative	1	0	0	0	0	Acute Leukemia	159	26.13
100	M	56	Related	06/30/2010	08/23/2010	09/03/2010	09/03/2010	Dead	1	Infection	65	3	No			Unknown	BB Any No	BB Before No	BB After No	b.40-59	White	No	3	1.77049	1	2.13115	1	2.13115	0	2.13115	08/02/2010	3				Non-myeloablative	0	0	0	1	0	Acute Leukemia	201	26.88
101	F	61	Related	06/22/2010	08/17/2010	08/17/2010	08/17/2010	Dead	1	Organ Failure	56	5	No			Unknown	BB Any No	BB Before No	BB After No	c.>=60	White	No	4	1.83607	1	1.83607	1	1.83607	0	1.83607						Non-myeloablative	0	0	1	0	0	MDS/MPN	135	23.24
102	M	36	Related	09/08/2010	11/30/2010	01/07/2011	01/07/2011	Dead	1	Recurrent or Persistent Disease	121	3	No			Unknown	BB Any No	BB Before No	BB After No	a.<=39	White	No	3	2.72131	1	3.96721	1	3.96721	0	3.96721						Non-myeloablative	0	0	0	1	0	Lymphoma	144	20.58
103	F	42	Unrelated	12/03/2010	03/10/2011	12/03/2018		Followup	0		2922	3	No			Unknown	BB Any No	BB Before No	BB After No	b.40-59	z.Other/Unknown	No	3	3.18033	0	95.8033	0	95.8033	0	95.8033	01/05/2011	3				Myeloablative	0	0	1	0	0	Acute Leukemia	114	21.48
104	M	57	Unrelated	10/08/2013	12/30/2013	12/31/2019		Followup	0		2275	3	No			Yes	BB Any Yes	BB Before No	BB After Yes	b.40-59	Black	No	3	2.72131	0	74.5902	0	74.5902	0	74.5902			07/10/2014	1		Myeloablative	1	0	0	0	0	MDS/MPN	224	33.06
105	M	61	Related	09/08/2010	11/29/2010	08/28/2018	08/28/2018	Dead	1	Infection	2911	2	No			Unknown	BB Any No	BB Before No	BB After No	c.>=60	White	No	2	2.68852	1	95.4426	1	95.4426	0	95.4426			06/30/2011	2		Myeloablative	1	0	0	0	0	Acute Leukemia	257	31.3
106	F	42	Related	07/16/2010	10/11/2010	10/04/2011	10/04/2011	Dead	1	Recurrent or Persistent Disease	445	3	No			Unknown	BB Any No	BB Before No	BB After No	b.40-59	Black	No	3	2.85246	1	14.5902	1	14.5902	0	14.5902	08/25/2010	1				Myeloablative	1	0	0	0	0	Acute Leukemia	199	27.9
107	F	30	Unrelated	10/06/2010	01/06/2011	07/16/2018		Followup	0		2840	4	No			Unknown	BB Any No	BB Before No	BB After No	a.<=39	White	No	4	3.01639	0	93.1148	0	93.1148	0	93.1148	11/11/2010	2				Myeloablative	1	0	0	0	0	Chronic Leukemia	125	21.34
108	M	37	Unrelated	10/15/2010	12/12/2010	12/12/2010	12/12/2010	Dead	1	GVHD	58	4	No			Unknown	BB Any No	BB Before No	BB After No	a.<=39	White	No	4	1.90164	1	1.90164	1	1.90164	0	1.90164	11/02/2010	3				Myeloablative	0	0	1	0	0	Acute Leukemia	291	40.48
109	M	61	Related	08/13/2010	10/12/2010	05/12/2011	05/12/2011	Dead	1	Other/Unknown	272	3	No			Unknown	BB Any No	BB Before No	BB After No	c.>=60	Black	No	3	1.96721	1	8.91803	1	8.91803	0	8.91803	09/27/2010	2	12/15/2010	2		Non-myeloablative	0	0	0	1	0	MDS/MPN	193	26.74
110	M	38	Unrelated	12/07/2010	04/26/2011	12/27/2016		Followup	0		2212	2	No			Unknown	BB Any No	BB Before No	BB After No	a.<=39	White	No	2	4.59016	0	72.5246	0	72.5246	0	72.5246	01/27/2011	3	08/15/2011	2		Myeloablative	1	0	0	0	0	Lymphoma	200	30.31
111	M	42	Unrelated	01/14/2011	02/14/2011	02/14/2011	02/14/2011	Dead	1		31	3	No			Unknown	BB Any No	BB Before No	BB After No	b.40-59	White	No	3	1.01639	1	1.01639	1	1.01639	0	1.01639						Myeloablative	0	0	1	0	0	MDS/MPN	192	26.94
112	F	68	Unrelated	03/08/2012	05/14/2012	04/16/2018		Followup	0		2230	2	No			Unknown	BB Any No	BB Before No	BB After No	c.>=60	White	No	2	2.19672	0	73.1148	0	73.1148	0	73.1148	04/12/2012	2				Non-myeloablative	0	0	1	0	0	Acute Leukemia	135	24.87
113	M	64	Unrelated	11/14/2013	11/16/2013	11/16/2013	11/16/2013	Dead	1	Infection	2	7	No			Yes	BB Any Yes	BB Before Yes	BB After Yes	c.>=60	White	No	4	0.0655738	1	0.0655738	1	0.0655738	0	0.0655738					Carvedilol	Non-myeloablative	0	0	0	1	0	Chronic Leukemia	195	26.9
114	F	33	Unrelated	03/17/2011	05/16/2011	02/28/2017		Followup	0		2175	3	No			Unknown	BB Any No	BB Before No	BB After No	a.<=39	White	No	3	1.96721	0	71.3115	0	71.3115	0	71.3115	05/02/2011	2				Non-myeloablative	0	0	1	0	0	Lymphoma	172	28.23
115	F	55	Unrelated	02/09/2011	04/22/2011	01/24/2019	01/24/2019	Dead	1	Recurrent or Persistent Disease	2906	2	No			Unknown	BB Any No	BB Before No	BB After No	b.40-59	White	No	2	2.36066	1	95.2787	1	95.2787	0	95.2787			12/12/2011	2		Myeloablative	1	0	0	0	0	Acute Leukemia	232	34.22
116	M	61	Related	06/19/2012	09/07/2012	04/14/2013	04/14/2013	Dead	1	Organ Failure	299	7	No			Yes	BB Any Yes	BB Before Yes	BB After No	c.>=60	White	No	4	2.62295	1	9.80328	1	9.80328	0	9.80328	08/02/2012	2			Metoprolol	Non-myeloablative	1	0	0	0	0	Acute Leukemia	233	34.09
117	F	35	Unrelated	04/29/2011	06/21/2011	06/20/2017		Followup	0		2244	6	No			Unknown	BB Any No	BB Before No	BB After No	a.<=39	Black	No	4	1.7377	0	73.5738	0	73.5738	0	73.5738						Non-myeloablative	1	0	0	0	0	Other	140	22.43
118	F	54	Unrelated	10/27/2010	12/23/2010	12/26/2010	12/26/2010	Dead	1		60	5	No			Unknown	BB Any No	BB Before No	BB After No	b.40-59	z.Other/Unknown	No	4	1.86885	1	1.96721	1	1.96721	0	1.96721						Myeloablative	0	0	1	0	0	MDS/MPN	138	22.92
119	F	39	Related	10/29/2010	01/31/2011	02/24/2011	02/24/2011	Dead	1	Infection	118	4	No			Yes	BB Any Yes	BB Before Yes	BB After Yes	a.<=39	White	No	4	3.08197	1	3.86885	1	3.86885	0	3.86885	01/12/2011	3			Metoprolol	Non-myeloablative	0	0	0	0	1	Other	143	28.97
120	M	24	Related	06/29/2011	08/26/2011	02/04/2019		Followup	0		2777	1	No			Unknown	BB Any Yes	BB Before Yes	BB After Yes	a.<=39	White	No	1	1.90164	0	91.0492	0	91.0492	0	91.0492			10/10/2011	2	Metoprolol	Non-myeloablative	0	0	0	0	1	Other	171	24.46
121	M	45	Unrelated	10/29/2010	02/01/2011	07/24/2011	07/24/2011	Dead	1	Organ Failure	268	3	No			Unknown	BB Any No	BB Before No	BB After No	b.40-59	White	No	3	3.11475	1	8.78689	1	8.78689	0	8.78689	11/17/2010	4				Myeloablative	0	0	1	0	0	Acute Leukemia	141	20.6
122	M	44	Related	07/02/2013	09/24/2013	07/12/2019		Followup	0		2201	3	No			Unknown	BB Any No	BB Before No	BB After No	b.40-59	White	No	3	2.7541	0	72.1639	0	72.1639	0	72.1639	01/08/2014	2				Myeloablative	1	0	0	0	0	MDS/MPN	217	27.26
123	F	58	Related	06/29/2011	08/02/2011	08/04/2011	08/04/2011	Dead	1	Recurrent or Persistent Disease	36	1	No			Unknown	BB Any No	BB Before No	BB After No	b.40-59	Black	No	1	1.11475	1	1.18033	1	1.18033	0	1.18033						Myeloablative	1	0	0	0	0	Acute Leukemia	157	25.91
124	M	51	Unrelated	12/06/2011	02/21/2012	02/22/2012	02/22/2012	Dead	1	Organ Failure	78	4	No			Yes	BB Any No	BB Before No	BB After No	b.40-59	White	No	4	2.52459	1	2.55738	1	2.55738	0	2.55738	01/13/2012	2				Myeloablative	0	0	1	0	0	Acute Leukemia	212	29.69
125	F	49	Related	12/23/2010	03/23/2011	09/13/2011	09/13/2011	Dead	1	Recurrent or Persistent Disease	264	3	No			Unknown	BB Any No	BB Before No	BB After No	b.40-59	White	No	3	2.95082	1	8.65574	1	8.65574	0	8.65574	01/19/2011	2				Myeloablative	1	0	0	0	0	Acute Leukemia	196	32.19
126	M	63	Unrelated	06/13/2017	09/13/2017	05/04/2020		Followup	0		1056	3	No			Unknown	BB Any No	BB Before No	BB After No	c.>=60	White	No	3	3.01639	0	34.623	0	34.623	0	34.623			11/15/2018	2		Myeloablative	1	0	0	0	0	Other	180	28.07	174	26.67	4.6		-6
127	M	45	Unrelated	12/08/2010	03/15/2011	11/29/2011	11/29/2011	Dead	1	Infection	356	5	No			Yes	BB Any No	BB Before No	BB After No	b.40-59	Black	No	4	3.18033	1	11.6721	1	11.6721	0	11.6721	01/19/2011	2				Myeloablative	1	0	0	0	0	Acute Leukemia	315	41.6
128	M	57	Unrelated	02/15/2011	05/19/2011	07/16/2013	07/16/2013	Dead	1	Other/Unknown	882	5	Yes	31MAY2011	105	Unknown	BB Any No	BB Before No	BB After No	b.40-59	White	No	4	3.04918	1	28.918	0	3.44262	1	3.44262						Myeloablative	1	0	0	0	0	MDS/MPN	188	23.6
129	F	48	Unrelated	01/18/2011	04/13/2011	02/25/2019		Followup	0		2960	2	No			Unknown	BB Any No	BB Before No	BB After No	b.40-59	White	No	2	2.78689	0	97.0492	0	97.0492	0	97.0492	02/09/2011	2	05/14/2012	2		Myeloablative	1	0	0	0	0	Lymphoma	170	31.64
130	M	67	Unrelated	06/16/2011	08/06/2011	08/06/2011	08/06/2011	Dead	1	Infection	51	3	No			Unknown	BB Any No	BB Before No	BB After No	c.>=60	White	No	3	1.67213	1	1.67213	1	1.67213	0	1.67213						Non-myeloablative	0	0	0	1	0	MDS/MPN	192	26.04
131	M	65	Related	11/24/2010	01/28/2011	05/15/2011	05/15/2011	Dead	1	Recurrent or Persistent Disease	172	3	Yes	03MAR2011	99	Unknown	BB Any No	BB Before No	BB After No	c.>=60	White	No	3	2.13115	1	5.63934	0	3.2459	1	3.2459	12/29/2010	1				Myeloablative	1	0	0	0	0	Acute Leukemia	179	25.09
132	M	61	Unrelated	01/12/2011	04/18/2011	01/14/2019		Followup	0		2924	2	No			Unknown	BB Any No	BB Before No	BB After No	c.>=60	White	No	2	3.14754	0	95.8689	0	95.8689	0	95.8689	03/11/2011	2	01/14/2019	1		Myeloablative	0	0	1	0	0	Acute Leukemia	206	27.89
133	M	58	Unrelated	01/05/2011	04/06/2011	10/31/2011	10/31/2011	Dead	1	Recurrent or Persistent Disease	299	1	No			Unknown	BB Any No	BB Before No	BB After No	b.40-59	White	No	1	2.98361	1	9.80328	1	9.80328	0	9.80328	02/08/2011	2				Myeloablative	1	0	0	0	0	Acute Leukemia	155	24.27
134	F	53	Related	01/19/2011	03/21/2011	03/22/2011	03/22/2011	Dead	1	Recurrent or Persistent Disease	62	3	No			Unknown	BB Any No	BB Before No	BB After No	b.40-59	White	No	3	2	1	2.03279	1	2.03279	0	2.03279	02/28/2011	2				Myeloablative	1	0	0	0	0	Acute Leukemia	149	26.33
135	M	40	Unrelated	02/08/2011	03/29/2011	04/22/2012	04/22/2012	Dead	1	Infection	439	4	No			Unknown	BB Any No	BB Before No	BB After No	b.40-59	White	No	4	1.60656	1	14.3934	1	14.3934	0	14.3934	03/15/2011	3				Non-myeloablative	0	0	0	1	0	Other	158	21.65
136	M	38	Unrelated	03/01/2011	04/04/2011	04/04/2011	04/04/2011	Dead	1	Organ Failure	34	3	No			Unknown	BB Any No	BB Before No	BB After No	a.<=39	White	No	3	1.11475	1	1.11475	1	1.11475	0	1.11475						Myeloablative	0	0	0	0	1	Lymphoma	134	19.79
137	F	51	Related	10/27/2011	12/15/2011	08/01/2018		Followup	0		2470	4	No			Unknown	BB Any Yes	BB Before Yes	BB After Yes	b.40-59	White	No	4	1.60656	0	80.9836	0	80.9836	0	80.9836			10/23/2013	1	Metoprolol	Non-myeloablative	0	0	1	0	0	Other	194	28.73
138	M	24	Related	01/04/2011	03/07/2011	12/30/2015		Followup	0		1821	2	No			Unknown	BB Any No	BB Before No	BB After No	a.<=39	White	No	2	2.03279	0	59.7049	0	59.7049	0	59.7049						Non-myeloablative	0	0	1	0	0	Other	203	26.06
139	M	51	Related	01/19/2011	04/21/2011	02/15/2013	02/15/2013	Dead	1	Infection	758	1	No			Unknown	BB Any No	BB Before No	BB After No	b.40-59	White	No	1	3.01639	1	24.8525	1	24.8525	0	24.8525	03/28/2011	3	07/29/2011	2		Non-myeloablative	0	0	0	1	0	Chronic Leukemia	284	36.86
140	M	59	Unrelated	08/27/2011	11/28/2011	08/11/2012	08/11/2012	Dead	1	Infection	350	4	No			Yes	BB Any No	BB Before Yes	BB After Yes	b.40-59	White	No	4	3.04918	1	11.4754	1	11.4754	0	11.4754	09/18/2011	3			Metoprolol	Non-myeloablative	0	0	0	1	0	Chronic Leukemia	270	36.52
141	F	47	Unrelated	03/16/2011	07/25/2011	04/08/2019		Followup	0		2945	4	No			Unknown	BB Any No	BB Before No	BB After No	b.40-59	Black	No	4	4.29508	0	96.5574	0	96.5574	0	96.5574	04/26/2011	3	03/15/2012	2		Myeloablative	0	0	1	0	0	Acute Leukemia	203	35.09
142	M	45	Related	01/05/2011	04/07/2011	10/24/2012	10/24/2012	Dead	1	Infection	658	2	No			Unknown	BB Any No	BB Before No	BB After No	b.40-59	Black	No	2	3.01639	1	21.5738	1	21.5738	0	21.5738			10/31/2011	2		Myeloablative	1	0	0	0	0	Acute Leukemia	178	24.6
143	M	56	Unrelated	03/25/2011	09/08/2011	05/26/2012	05/26/2012	Dead	1		428	5	No			Yes	BB Any No	BB Before Yes	BB After Yes	b.40-59	White	No	4	5.47541	1	14.0328	1	14.0328	0	14.0328	04/12/2011	2			Metoprolol	Non-myeloablative	0	0	0	1	0	Chronic Leukemia	203	27.53
144	M	47	Unrelated	04/01/2011	07/12/2011	03/19/2019		Followup	0		2909	2	No			Unknown	BB Any No	BB Before No	BB After No	b.40-59	White	No	2	3.34426	0	95.377	0	95.377	0	95.377	04/08/2011	2				Myeloablative	0	0	1	0	0	Acute Leukemia	174	23.02
145	M	53	Related	05/03/2011	08/01/2011	07/04/2012	07/04/2012	Dead	1	Infection	428	1	No			Unknown	BB Any No	BB Before No	BB After No	b.40-59	White	No	1	2.95082	1	14.0328	1	14.0328	0	14.0328	05/27/2011	1	01/09/2012	2		Myeloablative	1	0	0	0	0	Lymphoma	206	30.56
146	F	50	Unrelated	04/27/2011	08/01/2011	04/07/2013	04/07/2013	Dead	1	Recurrent or Persistent Disease	711	3	No			Unknown	BB Any No	BB Before No	BB After No	b.40-59	White	No	3	3.14754	1	23.3115	1	23.3115	0	23.3115	07/28/2011	3	10/31/2011	1		Myeloablative	1	0	0	0	0	Acute Leukemia	207	31.08
147	F	54	Unrelated	03/18/2011	07/07/2011	04/29/2019		Followup	0		2964	3	No			Unknown	BB Any No	BB Before No	BB After No	b.40-59	White	No	3	3.63934	0	97.1803	0	97.1803	0	97.1803	04/08/2011	3	07/16/2012	2		Myeloablative	0	0	0	0	1	Acute Leukemia	134	23.71
148	F	28	Unrelated	03/09/2011	04/22/2011	06/30/2011	06/30/2011	Dead	1	Recurrent or Persistent Disease	113	3	Yes	13APR2011	35	Unknown	BB Any No	BB Before No	BB After No	a.<=39	White	No	3	1.44262	1	3.70492	0	1.14754	1	1.14754	04/12/2011	2				Myeloablative	0	0	1	0	0	Acute Leukemia	152	26.58
149	F	42	Unrelated	04/06/2011	07/07/2011	09/09/2019		Followup	0		3078	7	No			Unknown	BB Any No	BB Before No	BB After No	b.40-59	White	No	4	3.01639	0	100.918	0	100.918	0	100.918	04/24/2011	1	08/18/2011	1		Myeloablative	0	0	1	0	0	MDS/MPN	139	21.76
150	M	38	Unrelated	06/09/2011	09/01/2011	01/06/2012	01/06/2012	Dead	1	Recurrent or Persistent Disease	211	1	Yes	26AUG2011	78	Unknown	BB Any No	BB Before No	BB After No	a.<=39	White	No	1	2.7541	1	6.91803	0	2.55738	1	2.55738						Myeloablative	1	0	0	0	0	Acute Leukemia	230	32.25
151	M	49	Related	07/06/2011	09/30/2011	12/14/2016	12/14/2016	Dead	1	Other/Unknown	1988	2	No			Yes	BB Any No	BB Before No	BB After No	b.40-59	Black	No	2	2.81967	1	65.1803	1	65.1803	0	65.1803			07/29/2013	1		Myeloablative	1	0	0	0	0	MDS/MPN	204	28.58
152	M	47	Related	03/29/2011	04/21/2011	04/21/2011	04/21/2011	Dead	1	Infection	23	5	No			Yes	BB Any Yes	BB Before No	BB After Yes	b.40-59	Black	No	4	0.754098	1	0.754098	1	0.754098	0	0.754098						Myeloablative	1	0	0	0	0	Acute Leukemia	238	32.78
153	M	64	Unrelated	05/18/2011	07/13/2011	03/25/2012	03/25/2012	Dead	1	Infection	312	4	No			Unknown	BB Any No	BB Before No	BB After No	c.>=60	White	No	4	1.83607	1	10.2295	1	10.2295	0	10.2295	06/16/2011	1				Non-myeloablative	0	0	0	1	0	Acute Leukemia	176	27.65
154	F	53	Unrelated	06/07/2011	09/26/2011	06/19/2019		Followup	0		2934	2	No			Unknown	BB Any No	BB Before No	BB After No	b.40-59	White	No	2	3.63934	0	96.1967	0	96.1967	0	96.1967	07/12/2011	3				Myeloablative	1	0	0	0	0	Acute Leukemia	176	23.77
155	M	55	Unrelated	04/28/2011	08/04/2011	04/01/2012	04/01/2012	Dead	1	Recurrent or Persistent Disease	339	1	No			Unknown	BB Any No	BB Before No	BB After No	b.40-59	Black	No	1	3.21311	1	11.1148	1	11.1148	0	11.1148	05/17/2011	2				Non-myeloablative	0	0	0	1	0	Chronic Leukemia	260	37.66
156	M	23	Unrelated	05/06/2011	08/25/2011	05/08/2019		Followup	0		2924	2	No			Unknown	BB Any No	BB Before No	BB After No	a.<=39	White	No	2	3.63934	0	95.8689	0	95.8689	0	95.8689	07/28/2011	3				Myeloablative	0	0	1	0	0	Acute Leukemia	168	21.73
157	F	59	Unrelated	07/20/2011	10/18/2011	01/20/2013	01/20/2013	Dead	1	Recurrent or Persistent Disease	550	6	No			Unknown	BB Any No	BB Before No	BB After No	b.40-59	White	No	4	2.95082	1	18.0328	1	18.0328	0	18.0328						Myeloablative	0	0	1	0	0	MDS/MPN	172	28.65
158	M	54	Unrelated	08/24/2011	10/10/2011	10/13/2011	10/13/2011	Dead	1	Organ Failure	50	3	Yes	25SEP2011	32	Unknown	BB Any No	BB Before No	BB After No	b.40-59	White	No	3	1.54098	1	1.63934	0	1.04918	1	1.04918	09/24/2011	2				Myeloablative	0	0	1	0	0	Acute Leukemia	171	24.22
159	F	36	Unrelated	07/07/2011	10/07/2011	10/12/2017		Followup	0		2289	3	No			Unknown	BB Any No	BB Before No	BB After No	a.<=39	White	No	3	3.01639	0	75.0492	0	75.0492	0	75.0492	07/28/2011	3	03/01/2012	2		Non-myeloablative	0	0	0	1	0	Lymphoma	166	27.66
160	M	55	Unrelated	06/08/2011	08/15/2011	10/23/2018	10/23/2018	Dead	1		2694	3	No			Unknown	BB Any No	BB Before No	BB After No	b.40-59	White	No	3	2.22951	1	88.3279	1	88.3279	0	88.3279	09/21/2011	4	09/15/2011	2		Myeloablative	1	0	0	0	0	Chronic Leukemia	205	26.82
161	M	34	Unrelated	06/01/2011	09/02/2011	01/25/2022		Followup	0		3891	3	No			Yes	BB Any Yes	BB Before Yes	BB After Yes	a.<=39	Black	No	3	3.04918	0	127.574	0	127.574	0	127.574	06/23/2011	3	04/01/2012	1	Metoprolol	Myeloablative	0	0	1	0	0	Lymphoma	168	24.54
162	F	54	Related	01/15/2013	02/27/2013	02/27/2013	02/27/2013	Dead	1	Infection	43	3	No			Unknown	BB Any No	BB Before No	BB After No	b.40-59	White	No	3	1.40984	1	1.40984	1	1.40984	0	1.40984						Non-myeloablative	0	0	0	1	0	Lymphoma	164	31.41
163	M	59	Unrelated	08/11/2011	11/14/2011	04/07/2012	04/07/2012	Dead	1	Infection	240	3	No			Unknown	BB Any No	BB Before No	BB After No	b.40-59	White	No	3	3.11475	1	7.86885	1	7.86885	0	7.86885						Non-myeloablative	0	0	0	1	0	MDS/MPN	168	22.03
164	F	50	Related	04/19/2013	07/03/2013	08/21/2013	08/21/2013	Dead	1	Recurrent or Persistent Disease	124	4	Yes	19JUN2013	61	Yes	BB Any Yes	BB Before Yes	BB After Yes	b.40-59	White	No	4	2.45902	1	4.06557	0	2	1	2	05/20/2013	1			Metoprolol	Myeloablative	1	0	0	0	0	Chronic Leukemia	179	30.94
165	F	39	Related	05/24/2011	08/19/2011	05/14/2019		Followup	0		2912	0	No			Unknown	BB Any No	BB Before No	BB After No	a.<=39	White	No	0	2.85246	0	95.4754	0	95.4754	0	95.4754	06/20/2011	1	12/19/2011	2		Myeloablative	1	0	0	0	0	Acute Leukemia	191	29.58
166	M	44	Unrelated	06/07/2011	12/02/2011	08/25/2015	08/25/2015	Dead	1	GVHD	1540	3	No			Unknown	BB Any No	BB Before No	BB After Yes	b.40-59	White	No	3	5.83607	1	50.4918	1	50.4918	0	50.4918	07/18/2011	3	05/03/2012	2		Myeloablative	1	0	0	0	0	Acute Leukemia	201	28.82
167	M	54	Unrelated	10/19/2011	12/24/2011	12/24/2011	12/24/2011	Dead	1	Organ Failure	66	2	No			Unknown	BB Any No	BB Before No	BB After No	b.40-59	Black	No	2	2.16393	1	2.16393	1	2.16393	0	2.16393	12/01/2011	2				Myeloablative	1	0	0	0	0	MDS/MPN	170	23.25
168	M	52	Related	12/07/2011	12/27/2011	12/27/2011	12/27/2011	Dead	1	Recurrent or Persistent Disease	20	4	No			Unknown	BB Any No	BB Before No	BB After No	b.40-59	White	No	4	0.655738	1	0.655738	1	0.655738	0	0.655738						Myeloablative	1	0	0	0	0	Lymphoma	265	36.32
169	F	54	Unrelated	11/16/2012	11/28/2012	11/28/2012	11/28/2012	Dead	1	Infection	12	4	No			Unknown	BB Any No	BB Before No	BB After No	b.40-59	White	No	4	0.393443	1	0.393443	1	0.393443	0	0.393443						Myeloablative	1	0	0	0	0	Acute Leukemia	156	24.18
170	M	60	Related	02/18/2014	05/05/2014	03/04/2019		Followup	0		1840	4	No			Unknown	BB Any No	BB Before No	BB After No	c.>=60	White	No	4	2.4918	0	60.3279	0	60.3279	0	60.3279	05/31/2014	2	09/24/2014	2		Reduced Intensity	1	0	0	0	0	Acute Leukemia	174	26.52	160	25.49	4.2		-7
171	F	61	Related	12/15/2011	12/20/2011	12/20/2011	12/20/2011	Dead	1	Organ Failure	5	5	No			Unknown	BB Any No	BB Before No	BB After No	c.>=60	White	No	4	0.163934	1	0.163934	1	0.163934	0	0.163934						Myeloablative	0	0	0	1	0	Lymphoma	219	40.5
172	M	45	Unrelated	08/30/2011	10/04/2011	11/11/2011	11/11/2011	Dead	1	Infection	73	4	No			Unknown	BB Any No	BB Before No	BB After No	b.40-59	Black	No	4	1.14754	1	2.39344	1	2.39344	0	2.39344	09/15/2011	3				Myeloablative	1	0	0	0	0	Lymphoma	180	24.6
173	F	40	Related	06/05/2013	08/22/2013	10/07/2014	10/07/2014	Dead	1	Organ Failure	489	4	No			Unknown	BB Any No	BB Before No	BB After No	b.40-59	White	No	4	2.55738	1	16.0328	1	16.0328	0	16.0328	08/12/2013	2	03/24/2014	2		Non-myeloablative	0	0	0	1	0	Lymphoma	206	37.97
174	M	40	Unrelated	08/10/2011	10/31/2011	07/09/2018		Followup	0		2525	3	No			Unknown	BB Any No	BB Before No	BB After No	b.40-59	White	No	3	2.68852	0	82.7869	0	82.7869	0	82.7869	10/03/2011	3	04/23/2012	2		Myeloablative	1	0	0	0	0	Acute Leukemia	219	28.15
175	F	42	Related	05/21/2015	08/31/2015	01/09/2023		Followup	0		2790	4	No			Yes	BB Any No	BB Before No	BB After No	b.40-59	Black	No	4	3.34426	0	91.4754	0	91.4754	0	91.4754	08/24/2015	2	01/05/2016	2		Myeloablative	1	0	0	0	0	Chronic Leukemia	130	23.9	167	32.55	3.1	L	-10
176	F	62	Unrelated	09/21/2011	12/15/2011	09/09/2019		Followup	0		2910	2	No			Unknown	BB Any No	BB Before No	BB After No	c.>=60	White	No	2	2.78689	0	95.4098	0	95.4098	0	95.4098	12/08/2011	3				Myeloablative	1	0	0	0	0	MDS/MPN	214	33.17
177	F	56	Unrelated	11/18/2015	03/09/2016	11/10/2017	11/10/2017	Dead	1		723	7	No			Yes	BB Any Yes	BB Before No	BB After Yes	b.40-59	White	No	4	3.67213	1	23.7049	1	23.7049	0	23.7049	12/13/2015	4	04/04/2016	2		Myeloablative	1	0	0	0	0	Other	221	36.36	187	30.81	3.4	L	-9
178	M	41	Unrelated	08/03/2011	10/26/2011	09/01/2016		Followup	0		1856	3	No			Unknown	BB Any No	BB Before No	BB After No	b.40-59	White	No	3	2.7541	0	60.8525	0	60.8525	0	60.8525	08/18/2011	1				Myeloablative	0	0	1	0	0	Acute Leukemia	221	29.63
179	M	60	Related	05/09/2012	08/08/2012	05/03/2019	05/03/2019	Dead	1	Secondary Malignancy	2550	1	No			Unknown	BB Any No	BB Before No	BB After No	c.>=60	White	No	1	2.98361	1	83.6066	1	83.6066	0	83.6066	03/04/2013	2	10/07/2013	2		Non-myeloablative	0	0	0	1	0	Chronic Leukemia	164	26.68
180	M	28	Unrelated	07/26/2012	09/19/2012	03/12/2014	03/12/2014	Dead	1	Infection	594	4	No			Unknown	BB Any No	BB Before No	BB After No	a.<=39	White	No	4	1.80328	1	19.4754	1	19.4754	0	19.4754						Non-myeloablative	0	0	0	0	1	Other	104	18.21
181	F	54	Unrelated	12/14/2011	03/09/2012	04/20/2012	04/20/2012	Dead	1	Other/Unknown	128	2	No			Unknown	BB Any No	BB Before No	BB After No	b.40-59	White	No	2	2.81967	1	4.19672	1	4.19672	0	4.19672	04/03/2012	3				Myeloablative	1	0	0	0	0	MDS/MPN	251	42.83
182	F	58	Unrelated	04/05/2012	10/10/2012	10/15/2012	10/15/2012	Dead	1	GVHD	193	3	No			Unknown	BB Any No	BB Before No	BB After No	b.40-59	White	No	3	6.16393	1	6.32787	1	6.32787	0	6.32787	06/29/2012	3				Myeloablative	1	0	0	0	0	Chronic Leukemia	169	28.91
183	M	50	Unrelated	08/03/2012	11/13/2012	11/13/2012	11/13/2012	Dead	1	GVHD	102	7	No			Unknown	BB Any No	BB Before No	BB After No	b.40-59	White	No	4	3.34426	1	3.34426	1	3.34426	0	3.34426	09/05/2012	3				Non-myeloablative	0	0	0	1	0	Acute Leukemia	176	25.41
184	M	68	Unrelated	08/22/2018	11/06/2018	01/05/2019	01/05/2019	Dead	1	Recurrent or Persistent Disease	136	3	No			Yes	BB Any Yes	BB Before Yes	BB After Yes	c.>=60	White	No	3	2.4918	1	4.45902	1	4.45902	0	4.45902	10/10/2018	1	11/19/2018	2	Carvedilol	Non-myeloablative	0	1	0	0	0	Acute Leukemia	250	39.47	226	36.68	3.7		-9
185	F	26	Unrelated	09/09/2011	11/18/2011	09/13/2015	09/13/2015	Dead	1	Recurrent or Persistent Disease	1465	3	No			Unknown	BB Any No	BB Before No	BB After No	a.<=39	White	No	3	2.29508	1	48.0328	1	48.0328	0	48.0328						Non-myeloablative	0	0	0	1	0	Other	113	19.83
186	M	23	Related	07/28/2011	11/16/2011	07/09/2019		Followup	0		2903	4	No			Unknown	BB Any No	BB Before No	BB After No	a.<=39	Black	No	4	3.63934	0	95.1803	0	95.1803	0	95.1803	12/31/2011	3	12/31/2011	1		Non-myeloablative	0	0	0	1	0	Lymphoma	185	26.54
187	M	53	Related	11/22/2011	02/16/2012	11/14/2017		Followup	0		2184	1	Yes	28FEB2013	464	Unknown	BB Any No	BB Before No	BB After No	b.40-59	White	No	1	2.81967	0	71.6066	0	15.2131	1	15.2131	03/08/2012	2	03/05/2013	1		Myeloablative	1	0	0	0	0	Lymphoma	205	25.23
188	M	22	Unrelated	12/21/2011	02/03/2012	11/15/2017		Followup	0		2156	4	No			Unknown	BB Any No	BB Before No	BB After No	a.<=39	White	No	4	1.44262	0	70.6885	0	70.6885	0	70.6885						Non-myeloablative	0	0	0	1	0	Lymphoma	256	33.92
189	F	35	Unrelated	12/03/2011	02/22/2012	02/22/2012	02/22/2012	Dead	1	Infection	81	4	No			No	BB Any No	BB Before No	BB After No	a.<=39	White	No	4	2.65574	1	2.65574	1	2.65574	0	2.65574	12/30/2011	1				Non-myeloablative	0	0	0	1	0	Lymphoma	200	30.69
190	M	51	Unrelated	10/19/2012	01/03/2013	08/03/2014	08/03/2014	Dead	1	GVHD	653	3	Yes	11APR2013	174	Unknown	BB Any No	BB Before No	BB After No	b.40-59	White	No	3	2.4918	1	21.4098	0	5.70492	1	5.70492	11/25/2013	3	11/25/2013	2		Myeloablative	1	0	0	0	0	Acute Leukemia	223	30.16
191	M	51	Related	08/02/2011	11/03/2011	12/15/2011	12/15/2011	Dead	1	Organ Failure	135	2	Yes	12DEC2011	132	Unknown	BB Any No	BB Before No	BB After No	b.40-59	White	No	2	3.04918	1	4.42623	0	4.32787	1	4.32787						Myeloablative	1	0	0	0	0	Acute Leukemia	165	24.96
192	M	43	Related	08/23/2011	11/18/2011	09/18/2012	09/18/2012	Dead	1	Organ Failure	392	3	Yes	28NOV2011	97	Unknown	BB Any No	BB Before No	BB After No	b.40-59	Black	No	3	2.85246	1	12.8525	0	3.18033	1	3.18033						Myeloablative	0	0	0	0	1	Chronic Leukemia	185	24.99
193	M	67	Unrelated	11/17/2011	02/24/2012	08/24/2012	08/24/2012	Dead	1	Infection	281	6	No			Unknown	BB Any No	BB Before No	BB After No	c.>=60	White	No	4	3.2459	1	9.21311	1	9.21311	0	9.21311						Non-myeloablative	0	0	0	1	0	Acute Leukemia	220	31.53
194	M	61	Unrelated	01/09/2015	04/06/2015	10/02/2015	10/02/2015	Dead	1		266	2	No			Unknown	BB Any No	BB Before No	BB After No	c.>=60	White	No	2	2.85246	1	8.72131	1	8.72131	0	8.72131	08/12/2015	3				Non-myeloablative	0	0	0	1	0	Lymphoma	223	30.16	199	27.26	4.1		-9
195	M	65	Related	08/19/2011	10/18/2011	12/12/2013	12/12/2013	Dead	1	GVHD	846	1	No			No	BB Any Yes	BB Before Yes	BB After Yes	c.>=60	White	No	1	1.96721	1	27.7377	1	27.7377	0	27.7377			09/09/2013	2	btype_other	Non-myeloablative	0	0	0	1	0	Acute Leukemia	177	25.38
196	M	19	Related	01/25/2012	04/20/2012	09/13/2015		Followup	0		1327	3	No			Unknown	BB Any No	BB Before No	BB After No	a.<=39	White	No	3	2.81967	0	43.5082	0	43.5082	0	43.5082			10/25/2012	2		Myeloablative	0	0	0	0	1	Lymphoma	183	27.99
197	F	56	Unrelated	09/23/2011	12/23/2011	12/23/2011	12/23/2011	Dead	1	Infection	91	5	No			Unknown	BB Any No	BB Before No	BB After No	b.40-59	White	No	4	2.98361	1	2.98361	1	2.98361	0	2.98361	11/08/2011	4				Reduced Intensity	0	0	0	0	1	MDS/MPN	179	31.36
198	F	57	Unrelated	10/19/2011	12/19/2011	02/07/2022		Followup	0		3764	3	No			Yes	BB Any Yes	BB Before No	BB After Yes	b.40-59	Black	No	3	2	0	123.41	0	123.41	0	123.41	11/17/2011	3	04/10/2012	2		Myeloablative	0	0	1	0	0	Acute Leukemia	190	32.64
199	M	62	Related	12/29/2011	03/23/2012	07/24/2012	07/24/2012	Dead	1	Recurrent or Persistent Disease	208	3	Yes	13MAR2012	75	Unknown	BB Any No	BB Before No	BB After No	c.>=60	White	No	3	2.78689	1	6.81967	0	2.45902	1	2.45902						Myeloablative	0	0	0	0	1	Acute Leukemia	174	27.3
200	M	59	Related	10/25/2011	01/25/2012	09/05/2017	09/05/2017	Dead	1	GVHD	2142	2	No			Yes	BB Any No	BB Before No	BB After No	b.40-59	White	No	2	3.01639	1	70.2295	1	70.2295	0	70.2295						Non-myeloablative	0	0	0	1	0	Chronic Leukemia	177	28.79
201	F	52	Related	12/28/2011	04/04/2012	12/20/2017		Followup	0		2184	4	No			Unknown	BB Any No	BB Before No	BB After No	b.40-59	White	No	4	3.21311	0	71.6066	0	71.6066	0	71.6066			10/11/2013	2		Myeloablative	1	0	0	0	0	Acute Leukemia	173	33.45
202	M	54	Unrelated	01/28/2012	04/20/2012	02/25/2017	02/25/2017	Dead	1	Organ Failure	1855	3	No			Unknown	BB Any No	BB Before No	BB After No	b.40-59	White	No	3	2.72131	1	60.8197	1	60.8197	0	60.8197	02/22/2012	3				Myeloablative	1	0	0	0	0	Acute Leukemia	140	21.43
203	M	66	Unrelated	10/12/2011	02/03/2012	02/13/2014	02/13/2014	Dead	1	GVHD	855	3	No			Yes	BB Any No	BB Before Yes	BB After Yes	c.>=60	White	No	3	3.7377	1	28.0328	1	28.0328	0	28.0328			05/30/2012	1	Metoprolol	Non-myeloablative	0	0	0	1	0	Chronic Leukemia	183	26.2
204	F	21	Unrelated	04/18/2012	07/12/2012	06/25/2018		Followup	0		2259	3	No			Unknown	BB Any No	BB Before No	BB After No	a.<=39	Black	No	3	2.78689	0	74.0656	0	74.0656	0	74.0656	06/12/2012	2	04/17/2013	2		Myeloablative	0	0	1	0	0	Lymphoma
205	M	58	Related	11/01/2011	01/10/2012	03/24/2012	03/24/2012	Dead	1	Recurrent or Persistent Disease	144	3	Yes	08FEB2012	99	Unknown	BB Any No	BB Before No	BB After No	b.40-59	White	No	3	2.29508	1	4.72131	0	3.2459	1	3.2459						Non-myeloablative	0	0	1	0	0	MDS/MPN	179	23.19
206	F	40	Unrelated	07/11/2012	09/28/2012	03/20/2019		Followup	0		2443	3	No			Unknown	BB Any No	BB Before No	BB After No	b.40-59	White	No	3	2.59016	0	80.0984	0	80.0984	0	80.0984						Myeloablative	1	0	0	0	0	MDS/MPN	138	22.11
207	M	36	Unrelated	11/09/2011	06/27/2012	10/22/2012	10/22/2012	Dead	1	GVHD	348	3	No			Unknown	BB Any Yes	BB Before No	BB After Yes	a.<=39	White	No	3	7.57377	1	11.4098	1	11.4098	0	11.4098	11/22/2011	3	09/28/2012	2		Myeloablative	1	0	0	0	0	Acute Leukemia	201	30.06
208	F	34	Unrelated	12/13/2011	01/14/2012	01/14/2012	01/14/2012	Dead	1	Organ Failure	32	4	No			Unknown	BB Any No	BB Before No	BB After No	a.<=39	White	No	4	1.04918	1	1.04918	1	1.04918	0	1.04918						Myeloablative	1	0	0	0	0	Lymphoma	170	30.92
209	M	36	Related	12/20/2011	03/08/2012	11/20/2012	11/20/2012	Dead	1	Infection	336	0	No			Unknown	BB Any No	BB Before No	BB After No	a.<=39	White	No	0	2.59016	1	11.0164	1	11.0164	0	11.0164	01/23/2012	2				Non-myeloablative	0	0	0	1	0	Acute Leukemia	243	30.47
210	M	47	Unrelated	01/18/2012	04/12/2012	01/06/2013	01/06/2013	Dead	1	Infection	354	6	No			Unknown	BB Any No	BB Before No	BB After No	b.40-59	White	No	4	2.78689	1	11.6066	1	11.6066	0	11.6066						Myeloablative	1	0	0	0	0	Acute Leukemia	233	36.54
211	F	45	Unrelated	04/17/2012	07/27/2012	10/11/2012	10/11/2012	Dead	1	Recurrent or Persistent Disease	177	4	Yes	13SEP2012	149	Unknown	BB Any No	BB Before No	BB After No	b.40-59	White	No	4	3.31148	1	5.80328	0	4.88525	1	4.88525	05/10/2012	3				Myeloablative	0	0	0	0	1	Acute Leukemia	148	26.92
212	M	55	Unrelated	12/28/2011	03/26/2012	06/13/2014	06/13/2014	Dead	1	GVHD	898	3	No			Yes	BB Any Yes	BB Before No	BB After Yes	b.40-59	Black	No	3	2.91803	1	29.4426	1	29.4426	0	29.4426	01/18/2012	3	09/27/2012	2		Myeloablative	0	0	1	0	0	Chronic Leukemia	208	26.18
213	M	48	Unrelated	02/16/2012	05/18/2012	04/19/2018		Followup	0		2254	1	No			Unknown	BB Any No	BB Before No	BB After No	b.40-59	White	No	1	3.01639	0	73.9016	0	73.9016	0	73.9016	09/11/2012	3	08/09/2013	1		Myeloablative	1	0	0	0	0	MDS/MPN	214	29.97
214	M	46	Related	12/10/2013	02/14/2014	05/05/2020	05/05/2020	Dead	1	Recurrent or Persistent Disease	2338	3	No			No	BB Any No	BB Before No	BB After No	b.40-59	White	No	3	2.16393	1	76.6557	1	76.6557	0	76.6557	09/06/2017	2	04/27/2016	2		Myeloablative	1	0	0	0	0	Other	161	21.83	174	24.36
215	M	46	Unrelated	02/29/2012	03/07/2012	03/07/2012	03/07/2012	Dead	1	Organ Failure	7	2	No			Unknown	BB Any No	BB Before No	BB After No	b.40-59	White	No	2	0.229508	1	0.229508	1	0.229508	0	0.229508						Myeloablative	1	0	0	0	0	Lymphoma	318	40.4
216	M	42	Related	03/04/2014	06/16/2014	12/07/2014	12/07/2014	Dead	1	Recurrent or Persistent Disease	278	3	No			Unknown	BB Any No	BB Before No	BB After No	b.40-59	White	No	3	3.40984	1	9.11475	1	9.11475	0	9.11475						Non-myeloablative	1	0	0	0	0	Acute Leukemia	227	32.91	203	29.1	4.6		-7
217	M	23	Related	01/04/2012	03/28/2012	03/29/2018		Followup	0		2276	0	No			Unknown	BB Any No	BB Before No	BB After No	a.<=39	White	No	0	2.7541	0	74.623	0	74.623	0	74.623						Myeloablative	0	0	0	0	1	Acute Leukemia	146	20.4
218	F	53	Unrelated	03/08/2012	07/27/2012	10/27/2012	10/27/2012	Dead	1	GVHD	233	7	No			Unknown	BB Any No	BB Before No	BB After No	b.40-59	White	No	4	4.62295	1	7.63934	1	7.63934	0	7.63934	04/14/2012	3				Non-myeloablative	0	0	0	1	0	MDS/MPN	178	28.01
219	M	62	Related	12/22/2011	03/01/2012	12/19/2012	12/19/2012	Dead	1	Recurrent or Persistent Disease	363	4	No			No	BB Any Yes	BB Before Yes	BB After No	c.>=60	White	No	4	2.29508	1	11.9016	1	11.9016	0	11.9016					Metoprolol	Non-myeloablative	0	0	0	1	0	MDS/MPN	164	23.95
220	F	46	Related	04/03/2013	06/18/2013	04/09/2019		Followup	0		2197	2	No			Unknown	BB Any No	BB Before No	BB After No	b.40-59	White	No	2	2.4918	0	72.0328	0	72.0328	0	72.0328	04/25/2014	2	05/05/2014	2		Myeloablative	1	0	0	0	0	Chronic Leukemia	154	27.3
221	M	55	Unrelated	01/26/2012	04/23/2012	01/03/2013	01/03/2013	Dead	1	Infection	343	3	No			Yes	BB Any Yes	BB Before No	BB After Yes	b.40-59	White	No	3	2.88525	1	11.2459	1	11.2459	0	11.2459	02/27/2012	2	09/15/2012	1		Myeloablative	1	0	0	0	0	Acute Leukemia	207	29.44
222	M	57	Unrelated	10/17/2012	12/21/2012	08/19/2020		Followup	0		2863	4	No			Yes	BB Any Yes	BB Before Yes	BB After No	b.40-59	White	No	4	2.13115	0	93.8689	0	93.8689	0	93.8689	11/12/2012	2	01/12/2013	1	Atenolol	Non-myeloablative	0	0	0	1	0	Lymphoma	183	27.04
223	M	58	Related	01/18/2012	04/10/2012	01/01/2013	01/01/2013	Dead	1	Recurrent or Persistent Disease	349	1	No			Yes	BB Any No	BB Before No	BB After No	b.40-59	White	No	1	2.72131	1	11.4426	1	11.4426	0	11.4426	06/29/2012	2				Non-myeloablative	0	0	0	0	1	Chronic Leukemia	195	26.6
224	F	45	Unrelated	07/17/2012	10/10/2012	05/29/2018		Followup	0		2142	4	No			Unknown	BB Any No	BB Before No	BB After No	b.40-59	White	No	4	2.78689	0	70.2295	0	70.2295	0	70.2295						Myeloablative	1	0	0	0	0	MDS/MPN	120	20.26
225	M	67	Related	11/20/2012	01/23/2013	01/15/2014	01/15/2014	Dead	1	Recurrent or Persistent Disease	421	4	No			Unknown	BB Any Yes	BB Before No	BB After Yes	c.>=60	White	No	4	2.09836	1	13.8033	1	13.8033	0	13.8033						Non-myeloablative	0	0	0	1	0	Acute Leukemia	180	29.26
226	M	65	Related	03/07/2012	05/10/2012	12/03/2013	12/03/2013	Dead	1	Recurrent or Persistent Disease	636	3	Yes	28AUG2013	539	Unknown	BB Any No	BB Before No	BB After No	c.>=60	White	No	3	2.09836	1	20.8525	0	17.6721	1	17.6721						Non-myeloablative	0	1	0	0	0	Acute Leukemia	151	23.95
227	F	24	Unrelated	03/28/2012	06/26/2012	12/04/2012	12/04/2012	Dead	1	Organ Failure	251	3	No			Unknown	BB Any No	BB Before No	BB After No	a.<=39	White	No	3	2.95082	1	8.22951	1	8.22951	0	8.22951	04/16/2012	3	11/16/2012	2		Myeloablative	1	0	0	0	0	Lymphoma	113	20.38
228	F	50	Related	06/27/2012	09/10/2012	07/03/2013	07/03/2013	Dead	1	Recurrent or Persistent Disease	371	3	No			Unknown	BB Any No	BB Before No	BB After No	b.40-59	Black	No	3	2.45902	1	12.1639	1	12.1639	0	12.1639			12/17/2012	2		Non-myeloablative	0	0	0	1	0	Acute Leukemia	126	22.55
229	M	45	Unrelated	02/08/2012	05/03/2012	05/16/2022		Followup	0		3750	6	No			Yes	BB Any No	BB Before No	BB After No	b.40-59	Black	No	4	2.78689	0	122.951	0	122.951	0	122.951						Myeloablative	0	0	1	0	0	Acute Leukemia	227	33.99
230	M	34	Related	01/18/2012	03/06/2012	03/23/2017		Followup	0		1891	4	No			Unknown	BB Any No	BB Before No	BB After No	a.<=39	White	No	4	1.57377	0	62	0	62	0	62			11/03/2012	1		Non-myeloablative	0	0	0	0	1	Other	149	25.37
231	M	46	Unrelated	05/16/2012	08/10/2012	08/02/2018		Followup	0		2269	3	No			Unknown	BB Any No	BB Before No	BB After No	b.40-59	Black	No	3	2.81967	0	74.3934	0	74.3934	0	74.3934			09/27/2013	1		Myeloablative	0	0	1	0	0	Lymphoma	216	35.18
232	F	60	Unrelated	03/27/2012	06/12/2012	06/14/2012	06/14/2012	Dead	1	Recurrent or Persistent Disease	79	2	Yes	10JUN2012	75	Unknown	BB Any No	BB Before No	BB After No	c.>=60	White	No	2	2.52459	1	2.59016	0	2.45902	1	2.45902						Myeloablative	1	0	0	0	0	Acute Leukemia	181	31.52
233	F	52	Unrelated	04/19/2012	07/12/2012	04/01/2013	04/01/2013	Dead	1	Infection	347	3	Yes	18DEC2012	243	Unknown	BB Any No	BB Before No	BB After No	b.40-59	White	No	3	2.7541	1	11.377	0	7.96721	1	7.96721	05/04/2012	2				Myeloablative	0	0	0	0	1	Acute Leukemia	154	26.03
234	F	36	Unrelated	04/20/2012	07/20/2012	06/21/2017		Followup	0		1888	5	No			Unknown	BB Any No	BB Before No	BB After No	a.<=39	White	No	4	2.98361	0	61.9016	0	61.9016	0	61.9016	07/02/2012	1	07/04/2012	1		Myeloablative	1	0	0	0	0	Acute Leukemia	212	37.04
235	M	48	Related	10/02/2013	12/19/2013	09/03/2019		Followup	0		2162	2	No			Unknown	BB Any No	BB Before No	BB After No	b.40-59	White	No	2	2.55738	0	70.8852	0	70.8852	0	70.8852	12/05/2013	1				Non-myeloablative	0	0	0	1	0	Lymphoma	189	29	182	27.89
236	F	53	Unrelated	11/13/2012	02/07/2013	08/31/2018		Followup	0		2117	6	No			Unknown	BB Any No	BB Before No	BB After No	b.40-59	White	No	4	2.81967	0	69.4098	0	69.4098	0	69.4098						Myeloablative	1	0	0	0	0	Lymphoma	188	33.32
237	M	51	Unrelated	05/17/2012	08/31/2012	06/04/2018		Followup	0		2209	4	No			Unknown	BB Any No	BB Before No	BB After No	b.40-59	White	No	4	3.47541	0	72.4262	0	72.4262	0	72.4262	06/06/2012	2	02/20/2013	1		Myeloablative	1	0	0	0	0	Acute Leukemia	142	22.09
238	F	31	Unrelated	02/29/2012	05/30/2012	05/27/2014		Followup	0		818	3	No			Unknown	BB Any No	BB Before No	BB After No	a.<=39	White	No	3	2.98361	0	26.8197	0	26.8197	0	26.8197	04/25/2012	2				Myeloablative	0	0	0	0	1	Acute Leukemia	148	23.25
239	M	67	Related	04/30/2014	07/24/2014	03/04/2019		Followup	0		1769	3	No			Unknown	BB Any No	BB Before No	BB After No	c.>=60	White	No	3	2.78689	0	58	0	58	0	58	07/28/2014	1				Non-myeloablative	0	0	0	1	0	MDS/MPN	176	25.9	145	21.85	4.8		-9
240	F	52	Related	12/09/2014	03/09/2015	12/19/2018		Followup	0		1471	3	No			Unknown	BB Any No	BB Before No	BB After No	b.40-59	White	No	3	2.95082	0	48.2295	0	48.2295	0	48.2295			06/22/2015	1		Myeloablative	1	0	0	0	0	Chronic Leukemia	247	41.21	215	36.8	3.4	L	-8
241	M	18	Related	03/08/2012	05/03/2012	05/12/2017		Followup	0		1891	3	No			Unknown	BB Any No	BB Before No	BB After No	a.<=39	z.Other/Unknown	No	3	1.83607	0	62	0	62	0	62						Non-myeloablative	0	0	0	0	1	Other	137	22.61
242	M	51	Related	04/10/2012	07/06/2012	03/23/2018		Followup	0		2173	3	No			Unknown	BB Any No	BB Before No	BB After No	b.40-59	White	No	3	2.85246	0	71.2459	0	71.2459	0	71.2459	05/30/2012	2				Myeloablative	1	0	0	0	0	Acute Leukemia	218	29.15
243	M	52	Related	04/11/2012	06/08/2012	06/22/2012	06/22/2012	Dead	1	Recurrent or Persistent Disease	72	3	No			Yes	BB Any Yes	BB Before No	BB After Yes	b.40-59	White	No	3	1.90164	1	2.36066	1	2.36066	0	2.36066	05/07/2012	1				Myeloablative	1	0	0	0	0	Lymphoma	198	32.62
244	M	62	Unrelated	06/05/2012	08/24/2012	10/19/2012	10/19/2012	Dead	1	GVHD	136	3	No			Unknown	BB Any No	BB Before No	BB After No	c.>=60	White	No	3	2.62295	1	4.45902	1	4.45902	0	4.45902	10/04/2012	3				Non-myeloablative	1	0	0	0	0	MDS/MPN	238	34.8
245	F	32	Unrelated	01/16/2013	04/19/2013	06/16/2013	06/16/2013	Dead	1	Organ Failure	151	3	No			Unknown	BB Any No	BB Before No	BB After No	a.<=39	White	No	3	3.04918	1	4.95082	1	4.95082	0	4.95082	02/08/2013	2				Non-myeloablative	0	0	0	1	0	Lymphoma	181	33.35
246	M	61	Related	04/02/2013	07/12/2013	03/30/2017	03/30/2017	Dead	1	GVHD	1458	3	No			Unknown	BB Any No	BB Before No	BB After No	c.>=60	White	No	3	3.31148	1	47.8033	1	47.8033	0	47.8033	04/29/2013	3	12/19/2013	1		Myeloablative	1	0	0	0	0	MDS/MPN	173	25.09
247	M	64	Unrelated	09/07/2012	12/07/2012	09/14/2018		Followup	0		2198	3	No			Unknown	BB Any No	BB Before No	BB After No	c.>=60	White	No	3	2.98361	0	72.0656	0	72.0656	0	72.0656	10/23/2012	3	05/09/2013	2		Non-myeloablative	0	0	0	1	0	MDS/MPN	189	27.63
248	M	56	Unrelated	10/31/2012	12/31/2012	08/31/2014	08/31/2014	Dead	1	Recurrent or Persistent Disease	669	8	No			No	BB Any Yes	BB Before Yes	BB After Yes	b.40-59	White	No	4	2	1	21.9344	1	21.9344	0	21.9344	12/07/2012	2	03/28/2013	2	Carvedilol	Non-myeloablative	0	0	0	1	0	MDS/MPN	210	35.58
249	F	66	Unrelated	04/24/2013	08/08/2013	01/25/2014	01/25/2014	Dead	1	Other/Unknown	276	2	No			Unknown	BB Any No	BB Before No	BB After No	c.>=60	White	No	2	3.47541	1	9.04918	1	9.04918	0	9.04918	05/29/2013	2	12/18/2013	2		Non-myeloablative	0	0	0	1	0	MDS/MPN	216	40.75
250	M	54	Unrelated	09/12/2019	01/03/2020	03/11/2020	03/11/2020	Dead	1	Recurrent or Persistent Disease	181	3	No			Unknown	BB Any No	BB Before No	BB After No	b.40-59	Black	No	3	3.70492	1	5.93443	1	5.93443	0	5.93443	09/26/2019	2				Myeloablative	0	0	1	0	0	Acute Leukemia	161	24.5	139	21.79	3.3	L	-10
251	M	46	Related	08/30/2012	11/12/2012	07/02/2017		Followup	0		1767	2	No			Unknown	BB Any Yes	BB Before Yes	BB After Yes	b.40-59	Black	No	2	2.42623	0	57.9344	0	57.9344	0	57.9344	02/06/2013	1	02/06/2013	2	Metoprolol	Myeloablative	1	0	0	0	0	Acute Leukemia	202	28.91
252	M	55	Unrelated	11/11/2015	02/08/2016	01/03/2023		Followup	0		2610	4	No			Yes	BB Any No	BB Before No	BB After No	b.40-59	Black	No	4	2.91803	0	85.5738	0	85.5738	0	85.5738			04/20/2016	2		Myeloablative	0	0	1	0	0	Acute Leukemia	235	31.04	211	28.14	3.4	L	-9
253	M	67	Unrelated	06/20/2012	09/27/2012	01/29/2013	01/29/2013	Dead	1	Recurrent or Persistent Disease	223	9	No			Unknown	BB Any No	BB Before No	BB After No	c.>=60	White	No	4	3.2459	1	7.31148	1	7.31148	0	7.31148	07/20/2012	3				Non-myeloablative	0	0	0	1	0	Acute Leukemia	199	28.63
254	M	50	Related	08/09/2012	11/01/2012	03/24/2013	03/24/2013	Dead	1	Recurrent or Persistent Disease	227	2	No			Unknown	BB Any No	BB Before No	BB After No	b.40-59	White	No	2	2.7541	1	7.44262	1	7.44262	0	7.44262	09/17/2012	2				Myeloablative	1	0	0	0	0	Acute Leukemia	248	36.25
255	F	34	Unrelated	06/27/2012	11/19/2012	06/22/2018		Followup	0		2186	4	No			Unknown	BB Any No	BB Before No	BB After No	a.<=39	Black	No	4	4.7541	0	71.6721	0	71.6721	0	71.6721	08/01/2012	2	12/05/2012	2		Myeloablative	0	0	1	0	0	Acute Leukemia	183	28.72
256	F	60	Unrelated	09/12/2012	12/28/2012	02/11/2013	02/11/2013	Dead	1	Recurrent or Persistent Disease	152	4	Yes	31JAN2013	141	Unknown	BB Any No	BB Before No	BB After No	c.>=60	White	No	4	3.5082	1	4.98361	0	4.62295	1	4.62295	10/08/2012	3				Myeloablative	1	0	0	0	0	Acute Leukemia	153	27.9
257	F	48	Unrelated	11/02/2012	01/24/2013	09/24/2019	05/30/2023	Followup	0		2517	4	Yes	05JUN2018	2041	Unknown	BB Any No	BB Before No	BB After No	b.40-59	White	No	4	2.72131	0	82.5246	0	66.918	1	66.918	11/24/2012	3	04/06/2013	2		Myeloablative	1	0	0	0	0	MDS/MPN	138	23.96
258	M	48	Related	04/01/2016	06/09/2016	04/04/2019		Followup	0		1098	2	No			Unknown	BB Any No	BB Before No	BB After No	b.40-59	White	No	2	2.2623	0	36	0	36	0	36	09/06/2016	1				Non-myeloablative	0	1	0	0	0	Lymphoma	248	42.3	236	34.97	4.3		-8
259	M	32	Unrelated	07/03/2013	10/07/2013	05/19/2014	05/19/2014	Dead	1	Infection	320	3	No			Unknown	BB Any No	BB Before No	BB After No	a.<=39	White	No	3	3.14754	1	10.4918	1	10.4918	0	10.4918	08/12/2013	2	08/14/2013	2		Non-myeloablative	0	0	0	1	0	Lymphoma	200	31.69
260	M	44	Unrelated	07/25/2012	10/18/2012	02/06/2013	02/06/2013	Dead	1	Recurrent or Persistent Disease	196	5	No			Unknown	BB Any No	BB Before No	BB After No	b.40-59	White	No	4	2.78689	1	6.42623	1	6.42623	0	6.42623	08/06/2012	2				Myeloablative	0	0	1	0	0	Acute Leukemia	200	28.34
261	F	44	Unrelated	08/03/2012	09/12/2012	09/12/2012	09/12/2012	Dead	1	Infection	40	3	No			Unknown	BB Any Yes	BB Before Yes	BB After No	b.40-59	White	No	3	1.31148	1	1.31148	1	1.31148	0	1.31148					Propranolol	Myeloablative	1	0	0	0	0	Acute Leukemia	187	28.76
262	M	26	Related	08/07/2012	10/30/2012	10/25/2013	10/25/2013	Dead	1	Recurrent or Persistent Disease	444	3	Yes	04DEC2012	119	Unknown	BB Any No	BB Before No	BB After No	a.<=39	White	No	3	2.7541	1	14.5574	0	3.90164	1	3.90164						Myeloablative	1	0	0	0	0	Acute Leukemia	160	21.44
263	F	60	Related	06/19/2012	08/15/2012	08/15/2012	08/15/2012	Dead	1	Infection	57	2	No			Unknown	BB Any No	BB Before No	BB After No	c.>=60	White	No	2	1.86885	1	1.86885	1	1.86885	0	1.86885						Myeloablative	1	0	0	0	0	Acute Leukemia	138	22.68
264	M	58	Unrelated	12/12/2012	03/25/2013	04/09/2013	04/09/2013	Dead	1	Recurrent or Persistent Disease	118	2	No			Unknown	BB Any No	BB Before No	BB After No	b.40-59	White	No	2	3.37705	1	3.86885	1	3.86885	0	3.86885	03/12/2013	2				Myeloablative	0	0	1	0	0	Acute Leukemia	207	31.71
265	M	63	Unrelated	09/05/2012	11/27/2012	03/29/2017		Followup	0		1666	2	No			Unknown	BB Any No	BB Before No	BB After No	c.>=60	White	No	2	2.72131	0	54.623	0	54.623	0	54.623	11/12/2012	2	05/28/2013	2		Non-myeloablative	0	0	0	1	0	Chronic Leukemia	174	23.56
266	F	58	Related	09/06/2012	11/13/2012	11/13/2012	11/13/2012	Dead	1	Organ Failure	68	6	No			Unknown	BB Any No	BB Before No	BB After No	b.40-59	White	No	4	2.22951	1	2.22951	1	2.22951	0	2.22951						Non-myeloablative	0	0	0	1	0	MDS/MPN	232	41.69
267	M	35	Unrelated	08/28/2013	01/02/2014	08/26/2019		Followup	0		2189	4	No			Unknown	BB Any No	BB Before No	BB After No	a.<=39	Black	No	4	4.16393	0	71.7705	0	71.7705	0	71.7705	10/09/2013	2	11/05/2014	2		Myeloablative	0	0	1	0	0	Lymphoma	235	32.16	191	27.92
268	M	60	Related	10/18/2012	12/18/2012	01/10/2015	01/10/2015	Dead	1	Recurrent or Persistent Disease	814	3	No			Yes	BB Any Yes	BB Before Yes	BB After Yes	c.>=60	White	No	3	2	1	26.6885	1	26.6885	0	26.6885	11/30/2012	2	08/28/2014	2	btype_other	Non-myeloablative	0	0	0	1	0	MDS/MPN	263	38.45
269	F	43	Unrelated	09/05/2012	11/26/2012	07/13/2014	07/13/2014	Dead	1	Organ Failure	676	2	Yes	02DEC2013	453	Unknown	BB Any Yes	BB Before Yes	BB After Yes	b.40-59	White	No	2	2.68852	1	22.1639	0	14.8525	1	14.8525	11/07/2012	3	03/25/2013	2	Propranolol	Non-myeloablative	0	0	0	1	0	Acute Leukemia	131	23.58
270	F	34	Unrelated	02/01/2013	04/25/2013	09/13/2013	09/13/2013	Dead	1	Recurrent or Persistent Disease	224	3	No			Unknown	BB Any No	BB Before No	BB After No	a.<=39	White	No	3	2.72131	1	7.34426	1	7.34426	0	7.34426	03/20/2013	2	07/03/2013	2		Myeloablative	0	0	1	0	0	Lymphoma	177	27.11
271	M	64	Related	07/25/2012	01/25/2013	08/16/2013	08/16/2013	Dead	1	Other/Unknown	387	3	No			Unknown	BB Any No	BB Before No	BB After No	c.>=60	White	No	3	6.03279	1	12.6885	1	12.6885	0	12.6885	08/13/2012	2				Non-myeloablative	0	0	0	1	0	Acute Leukemia	229	30.69
272	M	59	Unrelated	04/04/2013	06/24/2013	06/24/2013	06/24/2013	Dead	1	GVHD	81	4	No			Unknown	BB Any Yes	BB Before Yes	BB After Yes	b.40-59	White	No	4	2.65574	1	2.65574	1	2.65574	0	2.65574	05/15/2013	3			Atenolol	Non-myeloablative	0	0	0	1	0	Chronic Leukemia	244	32.29
273	M	29	Related	09/19/2012	11/16/2012	06/07/2013	06/07/2013	Dead	1	Recurrent or Persistent Disease	261	2	Yes	05FEB2013	139	Unknown	BB Any No	BB Before No	BB After No	a.<=39	White	No	2	1.90164	1	8.55738	0	4.55738	1	4.55738						Non-myeloablative	0	0	0	1	0	Lymphoma	175	20.43
274	F	45	Unrelated	09/13/2012	12/20/2012	09/10/2018		Followup	0		2188	4	No			Unknown	BB Any No	BB Before No	BB After No	b.40-59	White	No	4	3.21311	0	71.7377	0	71.7377	0	71.7377	10/27/2012	3				Myeloablative	0	0	1	0	0	Acute Leukemia	215	32.61
275	M	55	Related	10/04/2012	11/23/2012	12/13/2018		Followup	0		2261	1	No			Unknown	BB Any Yes	BB Before Yes	BB After Yes	b.40-59	Black	No	1	1.63934	0	74.1311	0	74.1311	0	74.1311					Atenolol	Non-myeloablative	0	0	0	1	0	MDS/MPN	202	28.05
276	F	60	Unrelated	11/13/2012	12/24/2012	12/24/2012	12/24/2012	Dead	1	GVHD	41	2	No			Unknown	BB Any No	BB Before No	BB After No	c.>=60	White	No	2	1.34426	1	1.34426	1	1.34426	0	1.34426	12/04/2012	3				Myeloablative	0	0	1	0	0	MDS/MPN	241	41.57
277	F	53	Related	10/23/2012	01/10/2013	01/17/2013	01/17/2013	Dead	1	GVHD	86	3	No			Unknown	BB Any No	BB Before No	BB After No	b.40-59	Black	No	3	2.59016	1	2.81967	1	2.81967	0	2.81967	11/24/2012	5				Myeloablative	0	0	0	0	1	Acute Leukemia	133	24.54
278	M	65	Unrelated	09/28/2012	01/12/2013	01/16/2014	01/16/2014	Dead	1	Recurrent or Persistent Disease	475	1	No			Unknown	BB Any No	BB Before No	BB After No	c.>=60	White	No	1	3.47541	1	15.5738	1	15.5738	0	15.5738	11/16/2012	2	12/16/2013	1		Non-myeloablative	0	0	0	1	0	MDS/MPN	233	36.61
279	M	55	Related	11/12/2013	02/19/2014	05/09/2014	05/09/2014	Dead	1	Recurrent or Persistent Disease	178	3	No			Unknown	BB Any No	BB Before No	BB After No	b.40-59	White	No	3	3.2459	1	5.83607	1	5.83607	0	5.83607	12/18/2013	3				Non-myeloablative	0	0	0	1	0	Lymphoma	215	30.84	194	27.77
280	F	26	Unrelated	09/19/2012	03/10/2013	03/23/2013	03/23/2013	Dead	1	GVHD	185	3	No			Unknown	BB Any No	BB Before No	BB After No	a.<=39	White	No	3	5.63934	1	6.06557	1	6.06557	0	6.06557	11/02/2012	3				Non-myeloablative	0	0	0	1	0	Other	157	31.69
281	F	53	Related	09/25/2012	12/27/2012	03/13/2013	03/13/2013	Dead	1	Infection	169	4	No			Unknown	BB Any No	BB Before No	BB After No	b.40-59	White	No	4	3.04918	1	5.54098	1	5.54098	0	5.54098	02/14/2013	3				Myeloablative	1	0	0	0	0	Acute Leukemia	230	44.47
282	F	61	Unrelated	10/03/2012	11/07/2012	11/07/2012	11/07/2012	Dead	1	Infection	35	2	No			Unknown	BB Any No	BB Before No	BB After No	c.>=60	White	No	2	1.14754	1	1.14754	1	1.14754	0	1.14754	11/02/2012	2				Non-myeloablative	0	0	0	1	0	MDS/MPN	173	29.37
283	M	50	Related	11/17/2016	01/27/2017	11/14/2018		Followup	0		727	3	No			Unknown	BB Any No	BB Before No	BB After No	b.40-59	White	No	3	2.32787	0	23.8361	0	23.8361	0	23.8361			09/28/2017	1		Myeloablative	1	0	0	0	0	Acute Leukemia	206	28.7	181	25.83	4.1		-7
284	M	66	Unrelated	02/12/2013	04/08/2013	07/16/2019		Followup	0		2345	2	No			Unknown	BB Any No	BB Before No	BB After No	c.>=60	White	No	2	1.80328	0	76.8852	0	76.8852	0	76.8852	03/04/2013	2	10/28/2013	1		Non-myeloablative	0	0	0	1	0	Chronic Leukemia	195	26.72
285	M	63	Related	07/15/2014	10/07/2014	07/23/2019		Followup	0		1834	2	No			Unknown	BB Any No	BB Before No	BB After No	c.>=60	White	No	2	2.7541	0	60.1311	0	60.1311	0	60.1311			02/05/2015	2		Reduced Intensity	1	0	0	0	0	Acute Leukemia	183	27.83	163	25.35	4.1		-8
286	F	60	Related	11/14/2012	04/12/2013	05/04/2013	05/04/2013	Dead	1	Infection	171	3	No			Unknown	BB Any No	BB Before No	BB After No	c.>=60	White	No	3	4.88525	1	5.60656	1	5.60656	0	5.60656	12/07/2012	3				Non-myeloablative	0	0	0	1	0	MDS/MPN	177	32.62
287	M	70	Related	04/17/2013	07/19/2013	10/01/2013	10/01/2013	Dead	1	Recurrent or Persistent Disease	167	5	Yes	25JUN2013	69	Unknown	BB Any No	BB Before No	BB After No	c.>=60	White	Yes	4	3.04918	1	5.47541	0	2.2623	1	2.2623	05/29/2013	3				Non-myeloablative	0	0	0	1	0	Acute Leukemia	145	19.2
288	F	57	Unrelated	01/15/2014	04/16/2014	12/07/2022		Followup	0		3248	2	No			No	BB Any Yes	BB Before No	BB After Yes	b.40-59	White	No	2	2.98361	0	106.492	0	106.492	0	106.492	10/30/2014	1	01/08/2015	1		Myeloablative	0	0	1	0	0	Acute Leukemia	143	27.09	129	25.74	3.2	L	-8
289	M	65	Unrelated	12/12/2012	03/11/2013	09/21/2013	09/21/2013	Dead	1	Organ Failure	283	10	No			Unknown	BB Any Yes	BB Before Yes	BB After Yes	c.>=60	White	No	4	2.91803	1	9.27869	1	9.27869	0	9.27869	01/16/2013	2	07/02/2013	2	Atenolol	Non-myeloablative	0	0	0	1	0	Lymphoma	146	21.68
290	M	61	Unrelated	01/23/2013	03/25/2013	04/16/2014	04/16/2014	Dead	1		448	3	No			Unknown	BB Any No	BB Before No	BB After No	c.>=60	White	No	3	2	1	14.6885	1	14.6885	0	14.6885	04/08/2013	2	06/26/2013	2		Non-myeloablative	0	0	0	1	0	Acute Leukemia	211	29.54
291	M	57	Related	10/12/2016	01/03/2017	05/26/2022		Followup	0		2052	4	No			Yes	BB Any No	BB Before No	BB After No	b.40-59	White	No	4	2.72131	0	67.2787	0	67.2787	0	67.2787	11/16/2016	2	04/12/2017	2		Myeloablative	1	0	0	0	0	Acute Leukemia	186	28.33	165	25.88	3.7		-7
292	M	72	Unrelated	04/12/2013	05/24/2013	09/02/2013	09/02/2013	Dead	1	Recurrent or Persistent Disease	143	5	No			Yes	BB Any Yes	BB Before Yes	BB After Yes	c.>=60	White	No	4	1.37705	1	4.68852	1	4.68852	0	4.68852	05/06/2013	2			Metoprolol	Non-myeloablative	0	0	0	1	0	MDS/MPN	249	37.32
293	M	67	Unrelated	01/22/2013	04/18/2013	01/31/2019		Followup	0		2200	3	No			Unknown	BB Any No	BB Before No	BB After No	c.>=60	Black	No	3	2.81967	0	72.1311	0	72.1311	0	72.1311			05/22/2013	1		Myeloablative	0	0	1	0	0	Acute Leukemia	157	26.76
294	F	64	Unrelated	02/27/2013	05/22/2013	10/03/2013	10/03/2013	Dead	1	Secondary Malignancy	218	2	No			Unknown	BB Any No	BB Before No	BB After No	c.>=60	White	No	2	2.7541	1	7.14754	1	7.14754	0	7.14754	04/30/2013	2				Non-myeloablative	0	0	0	1	0	MDS/MPN	188	31.64
295	F	38	Unrelated	01/16/2013	04/18/2013	01/22/2019		Followup	0		2197	3	No			Unknown	BB Any No	BB Before No	BB After No	a.<=39	White	No	3	3.01639	0	72.0328	0	72.0328	0	72.0328	02/27/2013	1	04/16/2013	2		Myeloablative	1	0	0	0	0	Acute Leukemia	183	33.17
296	M	47	Unrelated	02/06/2013	05/09/2013	02/12/2019		Followup	0		2197	6	No			Unknown	BB Any No	BB Before No	BB After No	b.40-59	White	No	4	3.01639	0	72.0328	0	72.0328	0	72.0328	04/24/2013	2	11/13/2013	2		Myeloablative	1	0	0	0	0	Acute Leukemia	215	30.49
297	M	49	Related	10/31/2012	01/28/2013	09/11/2018	09/11/2018	Dead	1	Organ Failure	2141	3	No			Unknown	BB Any No	BB Before No	BB After No	b.40-59	White	No	3	2.91803	1	70.1967	1	70.1967	0	70.1967						Myeloablative	1	0	0	0	0	Acute Leukemia	227	30.12
298	M	44	Unrelated	12/21/2012	04/21/2013	04/21/2013	04/21/2013	Dead	1	Infection	121	7	No			Unknown	BB Any No	BB Before No	BB After No	b.40-59	White	No	4	3.96721	1	3.96721	1	3.96721	0	3.96721	02/27/2013	2				Non-myeloablative	0	0	0	0	1	Lymphoma	185	25.22
299	M	64	Related	01/03/2014	03/26/2014	01/22/2019		Followup	0		1845	3	No			Unknown	BB Any No	BB Before No	BB After No	c.>=60	White	No	3	2.68852	0	60.4918	0	60.4918	0	60.4918						Non-myeloablative	0	0	0	1	0	Lymphoma	222	35.86	214	35.85	4		-8
300	F	40	Unrelated	10/23/2013	12/19/2013	10/22/2019		Followup	0		2190	2	No			Unknown	BB Any No	BB Before No	BB After No	b.40-59	White	No	2	1.86885	0	71.8033	0	71.8033	0	71.8033	12/30/2013	2	07/03/2014	2		Non-myeloablative	0	0	0	1	0	Lymphoma	140	21.94	135	21.65
301	F	57	Related	10/31/2012	01/23/2013	01/23/2013	01/23/2013	Dead	1	Organ Failure	84	3	No			Unknown	BB Any No	BB Before No	BB After No	b.40-59	White	No	3	2.7541	1	2.7541	1	2.7541	0	2.7541	12/11/2012	2				Myeloablative	1	0	0	0	0	Acute Leukemia	189	33.94
302	F	22	Unrelated	06/19/2013	09/18/2013	04/08/2019		Followup	0		2119	2	No			Unknown	BB Any No	BB Before No	BB After No	a.<=39	White	No	2	2.98361	0	69.4754	0	69.4754	0	69.4754						Myeloablative	1	0	0	0	0	Lymphoma	144	24.92
303	M	52	Related	03/24/2014	06/11/2014	01/03/2015	01/03/2015	Dead	1	Recurrent or Persistent Disease	285	4	No			Yes	BB Any Yes	BB Before Yes	BB After Yes	b.40-59	z.Other/Unknown	No	4	2.59016	1	9.34426	1	9.34426	0	9.34426					Carvedilol	Myeloablative	1	0	0	0	0	Acute Leukemia	154	23.4	129	19.73	2.8	L	-10
304	M	57	Unrelated	01/26/2013	05/06/2013	01/29/2019		Followup	0		2194	3	No			Unknown	BB Any No	BB Before No	BB After No	b.40-59	White	No	3	3.27869	0	71.9344	0	71.9344	0	71.9344	02/19/2013	3	05/14/2014	2		Myeloablative	1	0	0	0	0	MDS/MPN	345	42.87
305	F	64	Related	02/05/2020	04/21/2020	01/06/2023		Followup	0		1066	2	No			Yes	BB Any Yes	BB Before No	BB After Yes	c.>=60	Black	No	2	2.4918	0	34.9508	0	34.9508	0	34.9508	03/19/2020	1				Reduced Intensity	0	1	0	0	0	Chronic Leukemia	186	35.18	175	33.18	4		-9
306	F	65	Unrelated	03/01/2013	06/27/2013	04/20/2014	04/20/2014	Dead	1	GVHD	415	3	No			Unknown	BB Any Yes	BB Before Yes	BB After Yes	c.>=60	White	No	3	3.86885	1	13.6066	1	13.6066	0	13.6066	03/28/2013	3	04/04/2014	2	Metoprolol	Non-myeloablative	0	0	0	1	0	MDS/MPN	147	24.72
307	M	65	Unrelated	02/01/2016	04/22/2016	04/28/2016	04/28/2016	Dead	1		87	5	No			No	BB Any Yes	BB Before Yes	BB After Yes	c.>=60	White	No	4	2.65574	1	2.85246	1	2.85246	0	2.85246	03/10/2016	3			Metoprolol	Myeloablative	0	1	0	0	0	MDS/MPN	184	26.41			3	L	-10
308	F	61	Unrelated	03/06/2013	06/05/2013	04/01/2019		Followup	0		2217	2	No			Unknown	BB Any No	BB Before No	BB After No	c.>=60	White	No	2	2.98361	0	72.6885	0	72.6885	0	72.6885	05/07/2013	2	07/31/2013	2		Myeloablative	0	0	1	0	0	Acute Leukemia	157	24.28
309	M	66	Related	03/05/2013	06/17/2013	05/04/2014	05/04/2014	Dead	1	GVHD	425	3	No			Unknown	BB Any No	BB Before No	BB After No	c.>=60	White	No	3	3.40984	1	13.9344	1	13.9344	0	13.9344	05/13/2013	3	08/23/2013	2		Non-myeloablative	0	0	0	1	0	Acute Leukemia	189	28.93
310	F	59	Unrelated	03/13/2013	07/09/2013	10/29/2013	10/29/2013	Dead	1	Infection	230	8	No			Unknown	BB Any Yes	BB Before No	BB After Yes	b.40-59	Black	No	4	3.86885	1	7.54098	1	7.54098	0	7.54098	04/18/2013	3				Myeloablative	0	0	1	0	0	Acute Leukemia	157	25.3
311	M	59	Unrelated	04/19/2013	07/26/2013	02/21/2014	02/21/2014	Dead	1	Infection	308	7	No			Unknown	BB Any Yes	BB Before Yes	BB After Yes	b.40-59	White	No	4	3.21311	1	10.0984	1	10.0984	0	10.0984	06/30/2013	2	06/24/2013	1	Metoprolol	Non-myeloablative	0	0	0	1	0	Acute Leukemia	161	24.75
312	M	36	Unrelated	03/23/2013	06/20/2013	11/12/2014	11/12/2014	Dead	1		599	2	Yes	08OCT2013	199	Unknown	BB Any No	BB Before No	BB After No	a.<=39	White	No	2	2.91803	1	19.6393	0	6.52459	1	6.52459	10/21/2013	2	11/01/2013	2		Myeloablative	1	0	0	0	0	Acute Leukemia	210	28.43
313	M	54	Related	02/13/2013	04/18/2013	02/10/2014	02/10/2014	Dead	1	Organ Failure	362	3	Yes	22JAN2014	343	Unknown	BB Any Yes	BB Before Yes	BB After Yes	b.40-59	White	No	3	2.09836	1	11.8689	0	11.2459	1	11.2459	03/22/2013	2			Metoprolol	Non-myeloablative	0	0	0	1	0	Acute Leukemia	141	22.66
314	M	67	Unrelated	10/24/2013	03/26/2014	12/20/2014	12/20/2014	Dead	1	GVHD	422	3	No			Unknown	BB Any No	BB Before No	BB After No	c.>=60	White	No	3	5.01639	1	13.8361	1	13.8361	0	13.8361	11/27/2013	2	07/02/2014	2		Non-myeloablative	0	0	0	0	1	Acute Leukemia	167	26.16	162	25.5
315	F	61	Related	04/17/2013	07/15/2013	09/09/2016	09/09/2016	Dead	1	Other/Unknown	1241	2	No			Unknown	BB Any No	BB Before No	BB After No	c.>=60	White	No	2	2.91803	1	40.6885	1	40.6885	0	40.6885	05/20/2013	2				Non-myeloablative	0	0	0	1	0	Lymphoma	118	22.64
316	M	44	Related	03/27/2013	06/21/2013	01/28/2019		Followup	0		2133	3	No			Unknown	BB Any No	BB Before No	BB After No	b.40-59	White	No	3	2.81967	0	69.9344	0	69.9344	0	69.9344	04/22/2013	2				Non-myeloablative	0	0	0	1	0	Other	176	26.91
317	M	30	Unrelated	03/05/2013	07/05/2013	11/06/2014	11/06/2014	Dead	1	Recurrent or Persistent Disease	611	4	No			Unknown	BB Any No	BB Before No	BB After No	a.<=39	White	No	4	4	1	20.0328	1	20.0328	0	20.0328	06/21/2013	4	06/28/2013	2		Myeloablative	1	0	0	0	0	Acute Leukemia	152	20.49
318	M	64	Unrelated	04/25/2013	07/15/2013	12/04/2013	12/04/2013	Dead	1	Infection	223	2	No			Unknown	BB Any No	BB Before No	BB After No	c.>=60	White	No	2	2.65574	1	7.31148	1	7.31148	0	7.31148	06/04/2013	3				Non-myeloablative	0	0	0	1	0	Lymphoma	193	29.3
319	M	44	Unrelated	06/05/2013	09/11/2013	07/30/2019		Followup	0		2246	3	No			Unknown	BB Any No	BB Before No	BB After No	b.40-59	Black	No	3	3.21311	0	73.6393	0	73.6393	0	73.6393	06/21/2013	3				Non-myeloablative	0	0	0	1	0	Lymphoma	217	35.32
320	F	20	Unrelated	06/07/2013	08/30/2013	01/05/2017		Followup	0		1308	3	No			Unknown	BB Any No	BB Before No	BB After No	a.<=39	White	No	3	2.7541	0	42.8852	0	42.8852	0	42.8852	06/25/2013	2				Myeloablative	0	0	1	0	0	Acute Leukemia	157	27.21
321	M	35	Unrelated	06/06/2013	08/29/2013	05/24/2018		Followup	0		1813	3	No			Unknown	BB Any No	BB Before No	BB After No	a.<=39	Black	No	3	2.7541	0	59.4426	0	59.4426	0	59.4426			04/24/2014	1		Myeloablative	1	0	0	0	0	Acute Leukemia	141	17.32
322	F	23	Unrelated	10/23/2013	02/14/2014	03/21/2019		Followup	0		1975	4	No			Unknown	BB Any No	BB Before No	BB After No	a.<=39	White	No	4	3.7377	0	64.7541	0	64.7541	0	64.7541	03/10/2014	3				Myeloablative	0	0	1	0	0	Acute Leukemia	290	54.47	258	47.25
323	M	59	Unrelated	04/24/2013	07/05/2013	07/12/2013	07/12/2013	Dead	1	Recurrent or Persistent Disease	79	2	Yes	02JUL2013	69	Unknown	BB Any No	BB Before No	BB After No	b.40-59	White	No	2	2.36066	1	2.59016	0	2.2623	1	2.2623						Reduced Intensity	0	0	0	0	1	Acute Leukemia	269	34.57	267	34.23
324	M	58	Unrelated	04/23/2013	07/23/2013	08/25/2014	08/25/2014	Dead	1	Recurrent or Persistent Disease	489	4	Yes	11JUL2014	444	Unknown	BB Any No	BB Before No	BB After No	b.40-59	White	No	4	2.98361	1	16.0328	0	14.5574	1	14.5574	07/01/2013	1				Myeloablative	1	0	0	0	0	Acute Leukemia	185	26.54
325	M	54	Related	08/21/2013	11/01/2013	07/11/2019		Followup	0		2150	3	No			Unknown	BB Any No	BB Before No	BB After No	b.40-59	White	No	3	2.36066	0	70.4918	0	70.4918	0	70.4918	12/12/2013	1	10/07/2013	1		Non-myeloablative	0	0	0	1	0	Lymphoma	181	27.53	169	26.57
326	F	56	Related	03/22/2018	06/19/2018	09/29/2022		Followup	0		1652	4	No			Yes	BB Any No	BB Before No	BB After No	b.40-59	White	No	4	2.91803	0	54.1639	0	54.1639	0	54.1639	05/14/2018	2	09/17/2018	2		Non-myeloablative	1	0	0	0	0	Acute Leukemia	183	32.34	159	29.03	3.4	L	-7
327	M	69	Unrelated	04/18/2013	05/18/2013	05/18/2013	05/18/2013	Dead	1	Organ Failure	30	8	No			Unknown	BB Any No	BB Before No	BB After No	c.>=60	White	No	4	0.983607	1	0.983607	1	0.983607	0	0.983607						Non-myeloablative	0	0	1	0	0	Acute Leukemia	175	25.93
328	M	56	Unrelated	05/22/2013	08/12/2013	07/16/2015	07/16/2015	Dead	1	Recurrent or Persistent Disease	785	3	No			Unknown	BB Any No	BB Before No	BB After No	b.40-59	White	No	3	2.68852	1	25.7377	1	25.7377	0	25.7377	06/26/2013	1	06/19/2014	1		Myeloablative	1	0	0	0	0	Acute Leukemia	213	30.26
329	M	65	Unrelated	05/29/2013	09/17/2013	06/18/2019		Followup	0		2211	2	No			Unknown	BB Any No	BB Before No	BB After No	c.>=60	White	No	2	3.63934	0	72.4918	0	72.4918	0	72.4918	06/25/2013	2	12/11/2013	2		Myeloablative	0	0	1	0	0	Acute Leukemia	227	29.71
330	M	60	Unrelated	01/16/2018	04/06/2018	04/27/2020		Followup	0		832	3	No			Unknown	BB Any No	BB Before No	BB After No	c.>=60	White	No	3	2.62295	0	27.2787	0	27.2787	0	27.2787	06/06/2018	4	08/15/2018	2		Non-myeloablative	1	0	0	0	0	Chronic Leukemia	188	28.21	179	27.01	3.4	L	-11
331	M	37	Unrelated	05/15/2013	08/24/2013	08/24/2013	08/24/2013	Dead	1	Organ Failure	101	3	No			Unknown	BB Any No	BB Before No	BB After No	a.<=39	White	No	3	3.31148	1	3.31148	1	3.31148	0	3.31148	07/22/2013	3				Myeloablative	1	0	0	0	0	Acute Leukemia	176	27.01
332	M	60	Unrelated	05/21/2013	08/19/2013	04/14/2015	04/14/2015	Dead	1	Infection	693	5	No			Unknown	BB Any No	BB Before No	BB After No	c.>=60	White	No	4	2.95082	1	22.7213	1	22.7213	0	22.7213	11/11/2013	3	09/08/2014	2		Reduced Intensity	1	0	0	0	0	Acute Leukemia	295	39.15
333	F	19	Unrelated	06/27/2013	08/12/2013	08/12/2013	08/12/2013	Dead	1	Organ Failure	46	4	No			Yes	BB Any No	BB Before No	BB After No	a.<=39	White	No	4	1.5082	1	1.5082	1	1.5082	0	1.5082						Myeloablative	0	0	0	0	1	Lymphoma	125	18.93
334	F	51	Unrelated	04/26/2013	07/25/2013	01/09/2015	01/09/2015	Dead	1	Infection	623	4	No			No	BB Any Yes	BB Before Yes	BB After Yes	b.40-59	White	No	4	2.95082	1	20.4262	1	20.4262	0	20.4262	06/11/2013	3	06/20/2014	2	Carvedilol	Non-myeloablative	0	0	0	1	0	Acute Leukemia	166	27.62
335	M	70	Related	07/10/2013	10/31/2013	03/11/2015	03/11/2015	Dead	1	Infection	609	4	No			Yes	BB Any No	BB Before No	BB After No	c.>=60	White	No	4	3.70492	1	19.9672	1	19.9672	0	19.9672	08/20/2013	3	08/20/2013	2		Non-myeloablative	0	0	0	1	0	Acute Leukemia	195	25.25
336	M	39	Related	10/31/2013	02/09/2014	02/09/2014	02/09/2014	Dead	1	GVHD	101	4	No			Unknown	BB Any No	BB Before No	BB After No	a.<=39	White	No	4	3.31148	1	3.31148	1	3.31148	0	3.31148	11/13/2013	3				Non-myeloablative	0	0	0	1	0	Lymphoma	155	21.59	156	21.7
337	F	63	Related	05/29/2013	07/06/2013	07/08/2013	07/08/2013	Dead	1	Infection	40	5	No			Yes	BB Any Yes	BB Before No	BB After Yes	c.>=60	White	No	4	1.2459	1	1.31148	1	1.31148	0	1.31148	06/21/2013	2				Non-myeloablative	0	0	0	1	0	Other	216	33.16
338	F	62	Unrelated	05/08/2013	07/25/2013	05/08/2014	05/08/2014	Dead	1	Infection	365	3	No			Unknown	BB Any No	BB Before No	BB After No	c.>=60	White	No	3	2.55738	1	11.9672	1	11.9672	0	11.9672	06/26/2013	3	07/11/2013	2		Non-myeloablative	0	0	0	1	0	Acute Leukemia	161	27.38
339	M	46	Related	05/01/2013	07/05/2013	09/30/2021		Followup	0		3074	4	No			Yes	BB Any No	BB Before No	BB After No	b.40-59	Black	No	4	2.13115	0	100.787	0	100.787	0	100.787	05/30/2013	2				Non-myeloablative	0	0	0	1	0	Lymphoma	143	20.47
340	M	51	Unrelated	05/13/2014	07/17/2014	05/16/2019		Followup	0		1829	4	No			Unknown	BB Any No	BB Before No	BB After No	b.40-59	Black	No	4	2.13115	0	59.9672	0	59.9672	0	59.9672	10/27/2014	2	11/06/2014	2		Non-myeloablative	1	0	0	0	0	Lymphoma	196	28.64	184	24.96	3.4	L	-9
341	M	64	Unrelated	10/04/2013	12/05/2013	10/08/2019		Followup	0		2195	3	No			Unknown	BB Any Yes	BB Before Yes	BB After Yes	c.>=60	White	No	3	2.03279	0	71.9672	0	71.9672	0	71.9672	03/10/2014	2	03/25/2014	2	Metoprolol	Non-myeloablative	0	0	0	1	0	Chronic Leukemia	201	28.98	185	27.65
342	M	65	Related	07/31/2013	01/06/2014	09/07/2018	09/07/2018	Dead	1	Secondary Malignancy	1864	1	No			Unknown	BB Any No	BB Before No	BB After No	c.>=60	White	No	1	5.21311	1	61.1148	1	61.1148	0	61.1148	01/16/2014	2				Non-myeloablative	0	0	0	1	0	Lymphoma	208	29.17	200	27.12
343	F	37	Unrelated	04/11/2014	06/30/2014	04/11/2019		Followup	0		1826	1	No			Unknown	BB Any No	BB Before No	BB After No	a.<=39	White	No	1	2.62295	0	59.8689	0	59.8689	0	59.8689	05/01/2014	2	01/05/2015	1		Myeloablative	1	0	0	0	0	Chronic Leukemia	221	35.58	203	33.46	4.3		-11
344	M	47	Unrelated	01/13/2016	04/18/2016	10/04/2016	10/04/2016	Dead	1	Recurrent or Persistent Disease	265	4	No			Unknown	BB Any No	BB Before No	BB After No	b.40-59	White	No	4	3.14754	1	8.68852	1	8.68852	0	8.68852	02/04/2016	2				Myeloablative	1	0	0	0	0	Acute Leukemia	234	27.39	231	26.25	4.1		-9
345	M	48	Unrelated	10/09/2013	01/29/2014	03/25/2017	03/25/2017	Dead	1	Recurrent or Persistent Disease	1263	5	No			No	BB Any Yes	BB Before Yes	BB After Yes	b.40-59	Black	No	4	3.67213	1	41.4098	1	41.4098	0	41.4098	11/06/2013	2	02/26/2014	2	Metoprolol	Myeloablative	0	0	1	0	0	Acute Leukemia	215	31.77	192	26.88
346	M	29	Unrelated	05/22/2013	09/09/2013	04/17/2019		Followup	0		2156	4	No			Unknown	BB Any No	BB Before No	BB After No	a.<=39	White	No	4	3.60656	0	70.6885	0	70.6885	0	70.6885	06/10/2013	1	11/21/2013	1		Myeloablative	0	0	1	0	0	Acute Leukemia	202	27.93
347	F	52	Unrelated	06/26/2013	08/28/2013	12/24/2013	12/24/2013	Dead	1	Recurrent or Persistent Disease	181	2	No			Unknown	BB Any No	BB Before No	BB After No	b.40-59	White	No	2	2.06557	1	5.93443	1	5.93443	0	5.93443	11/29/2013	2				Reduced Intensity	1	0	0	0	0	MDS/MPN
348	M	37	Related	05/22/2013	08/16/2013	03/29/2019		Followup	0		2137	3	No			Unknown	BB Any No	BB Before No	BB After No	a.<=39	White	No	3	2.81967	0	70.0656	0	70.0656	0	70.0656						Myeloablative	0	0	0	0	1	Acute Leukemia	146	20.93
349	M	64	Related	07/17/2013	10/09/2013	10/09/2013	10/09/2013	Dead	1	Organ Failure	84	4	No			Yes	BB Any No	BB Before No	BB After No	c.>=60	White	No	4	2.7541	1	2.7541	1	2.7541	0	2.7541						Myeloablative	0	0	0	0	1	Lymphoma	268	37.44
350	F	49	Unrelated	07/30/2013	11/18/2013	05/24/2019		Followup	0		2124	3	No			Unknown	BB Any No	BB Before No	BB After No	b.40-59	White	No	3	3.63934	0	69.6393	0	69.6393	0	69.6393	10/18/2013	3				Non-myeloablative	0	0	0	1	0	Chronic Leukemia	139	24.61
351	F	62	Unrelated	11/14/2013	03/11/2014	04/19/2016	04/19/2016	Dead	1	Recurrent or Persistent Disease	887	3	No			Unknown	BB Any No	BB Before No	BB After No	c.>=60	White	No	3	3.83607	1	29.082	1	29.082	0	29.082						Myeloablative	1	0	0	0	0	MDS/MPN	133	21.47	125	20.22
352	M	58	Unrelated	08/07/2013	11/07/2013	01/08/2014	01/08/2014	Dead	1	GVHD	154	5	No			Unknown	BB Any No	BB Before No	BB After No	b.40-59	White	No	4	3.01639	1	5.04918	1	5.04918	0	5.04918	11/25/2013	2				Non-myeloablative	0	0	0	1	0	Acute Leukemia	176	25.12
353	F	50	Related	01/23/2018	04/16/2018	01/23/2019		Followup	0		365	8	No			Unknown	BB Any No	BB Before No	BB After No	b.40-59	White	No	4	2.72131	0	11.9672	0	11.9672	0	11.9672	11/08/2018	3	08/24/2018	2		Myeloablative	1	0	0	0	0	MDS/MPN	139	21.31	127	19.52	4.2		-8
354	M	62	Related	08/29/2013	10/25/2013	06/22/2015	06/22/2015	Dead	1	Other/Unknown	662	5	No			Yes	BB Any Yes	BB Before Yes	BB After Yes	c.>=60	Black	No	4	1.86885	1	21.7049	1	21.7049	0	21.7049			02/26/2014	2	Atenolol	Non-myeloablative	0	0	1	0	0	MDS/MPN	183	25.82	142	21.77
355	M	61	Related	07/23/2013	10/17/2013	11/08/2021		Followup	0		3030	4	No			Yes	BB Any Yes	BB Before Yes	BB After Yes	c.>=60	Black	No	4	2.81967	0	99.3443	0	99.3443	0	99.3443			07/24/2014	2	Carvedilol	Myeloablative	1	0	0	0	0	Acute Leukemia	226	31.95
356	F	57	Unrelated	11/06/2013	08/22/2014	12/19/2022		Followup	0		3330	4	No			Yes	BB Any Yes	BB Before No	BB After Yes	b.40-59	White	No	4	9.47541	0	109.18	0	109.18	0	109.18	12/31/2013	4	03/04/2015	2		Myeloablative	0	0	1	0	0	Lymphoma	171	25.27
357	M	33	Unrelated	08/14/2013	11/11/2013	05/07/2014	05/07/2014	Dead	1	Recurrent or Persistent Disease	266	4	Yes	10MAR2014	208	Unknown	BB Any No	BB Before No	BB After No	a.<=39	White	No	4	2.91803	1	8.72131	0	6.81967	1	6.81967	02/10/2014	3				Myeloablative	0	0	0	0	1	Acute Leukemia	237	32.45
358	F	44	Unrelated	08/21/2013	11/18/2013	08/05/2019		Followup	0		2175	4	No			Unknown	BB Any No	BB Before No	BB After No	b.40-59	White	No	4	2.91803	0	71.3115	0	71.3115	0	71.3115	09/16/2013	2				Myeloablative	0	0	1	0	0	Acute Leukemia	127	25.59	109	21.96
359	M	48	Related	10/10/2013	01/07/2014	05/06/2014	05/06/2014	Dead	1	Recurrent or Persistent Disease	208	2	No			Unknown	BB Any No	BB Before No	BB After No	b.40-59	White	No	2	2.91803	1	6.81967	1	6.81967	0	6.81967						Myeloablative	0	0	1	0	0	MDS/MPN	189	27.89	163	24.67
360	M	45	Unrelated	12/23/2015	04/14/2016	08/02/2018		Followup	0		953	1	No			Unknown	BB Any No	BB Before No	BB After No	b.40-59	White	No	1	3.70492	0	31.2459	0	31.2459	0	31.2459	02/10/2016	1	05/11/2016	2		Myeloablative	0	0	1	0	0	Acute Leukemia	293	39.67	247	34.16	3.6		-10
361	M	36	Related	03/02/2016	05/19/2016	03/30/2018		Followup	0		758	1	No			Unknown	BB Any No	BB Before No	BB After No	a.<=39	White	No	1	2.55738	0	24.8525	0	24.8525	0	24.8525	05/03/2016	1				Myeloablative	1	0	0	0	0	Chronic Leukemia	214	32.56	190	29.86	4.5		-8
362	F	56	Related	03/24/2015	06/29/2015	06/27/2016	06/27/2016	Dead	1	Other/Unknown	461	3	No			Yes	BB Any Yes	BB Before Yes	BB After No	b.40-59	Black	No	3	3.18033	1	15.1148	1	15.1148	0	15.1148	05/27/2015	2	02/15/2016	2	btype_other	Reduced Intensity	1	0	0	0	0	Lymphoma	151	23.79	137	23.09	4.2		-8
363	F	63	Related	10/15/2013	01/23/2014	04/17/2014	04/17/2014	Dead	1	Infection	184	2	No			Yes	BB Any Yes	BB Before No	BB After Yes	c.>=60	White	No	2	3.27869	1	6.03279	1	6.03279	0	6.03279	12/27/2013	2				Non-myeloablative	0	0	0	1	0	MDS/MPN	121	20.49	124	20.62
364	F	59	Related	03/11/2014	04/30/2014	09/16/2014	09/16/2014	Dead	1	Recurrent or Persistent Disease	189	5	No			Yes	BB Any No	BB Before No	BB After No	b.40-59	White	No	4	1.63934	1	6.19672	1	6.19672	0	6.19672						Non-myeloablative	0	0	0	1	0	Acute Leukemia	204	36.82	214	38.86	3.8		-8
365	M	54	Related	10/24/2013	02/11/2014	02/11/2014	02/11/2014	Dead	1	Organ Failure	110	7	No			Yes	BB Any Yes	BB Before No	BB After Yes	b.40-59	White	No	4	3.60656	1	3.60656	1	3.60656	0	3.60656	11/16/2013	3				Myeloablative	1	0	0	0	0	Chronic Leukemia	169	24.14	143	19.95
366	F	51	Unrelated	02/12/2014	02/19/2014	02/19/2014	02/19/2014	Dead	1	Recurrent or Persistent Disease	7	2	No			Unknown	BB Any No	BB Before No	BB After No	b.40-59	White	No	2	0.229508	1	0.229508	1	0.229508	0	0.229508						Myeloablative	0	0	1	0	0	Acute Leukemia	142	25.47			3.2	L	-9
367	M	37	Unrelated	09/19/2013	12/10/2013	11/30/2019		Followup	0		2263	3	No			Yes	BB Any Yes	BB Before Yes	BB After Yes	a.<=39	White	No	3	2.68852	0	74.1967	0	74.1967	0	74.1967			05/30/2015	2	Metoprolol	Myeloablative	1	0	0	0	0	Acute Leukemia	348	51.53	324	47.87
368	F	34	Unrelated	04/25/2014	08/03/2014	09/11/2014	09/11/2014	Dead	1	Infection	139	4	No			Unknown	BB Any No	BB Before No	BB After No	a.<=39	Black	No	4	3.27869	1	4.55738	1	4.55738	0	4.55738						Myeloablative	0	0	1	0	0	Chronic Leukemia	248	39.35	247	39.02	3.7		-9
369	M	46	Unrelated	10/30/2013	03/06/2014	05/06/2014	05/06/2014	Dead	1	Organ Failure	188	2	No			Unknown	BB Any No	BB Before No	BB After No	b.40-59	z.Other/Unknown	No	2	4.16393	1	6.16393	1	6.16393	0	6.16393	11/21/2013	2				Myeloablative	0	0	1	0	0	MDS/MPN	191	29.05	173	26.66
370	M	20	Unrelated	09/12/2013	11/14/2013	03/12/2019		Followup	0		2007	1	No			Unknown	BB Any No	BB Before No	BB After No	a.<=39	White	No	1	2.06557	0	65.8033	0	65.8033	0	65.8033			09/04/2018	1		Non-myeloablative	0	0	0	1	0	Other	184	26.96	175	25.28
371	M	21	Unrelated	01/08/2014	03/18/2014	11/02/2018		Followup	0		1759	3	No			Unknown	BB Any No	BB Before No	BB After No	a.<=39	White	No	3	2.2623	0	57.6721	0	57.6721	0	57.6721						Non-myeloablative	0	0	0	1	0	Other	155	22.22	147	23.04	4.7		-7
372	M	39	Unrelated	09/04/2013	09/27/2013	09/27/2013	09/27/2013	Dead	1	Infection	23	2	No			Yes	BB Any No	BB Before No	BB After No	a.<=39	White	No	2	0.754098	1	0.754098	1	0.754098	0	0.754098						Myeloablative	1	0	0	0	0	Acute Leukemia	195	25.75
373	F	40	Unrelated	09/18/2013	02/02/2014	02/02/2014	02/02/2014	Dead	1	Organ Failure	137	3	No			Yes	BB Any Yes	BB Before No	BB After Yes	b.40-59	Black	No	3	4.4918	1	4.4918	1	4.4918	0	4.4918						Myeloablative	0	0	1	0	0	Lymphoma	182	35.52	152	29.75
374	M	64	Related	09/13/2013	12/19/2013	01/03/2023		Followup	0		3399	3	No			No	BB Any No	BB Before Yes	BB After Yes	c.>=60	White	No	3	3.18033	0	111.443	0	111.443	0	111.443	10/16/2013	2	01/10/2014	2	Atenolol	Non-myeloablative	0	1	0	0	0	Acute Leukemia	144	22.63	138	21.66
375	M	49	Unrelated	08/28/2013	12/16/2013	06/01/2014	06/01/2014	Dead	1		277	3	No			Yes	BB Any Yes	BB Before Yes	BB After Yes	b.40-59	White	No	3	3.60656	1	9.08197	1	9.08197	0	9.08197	03/21/2014	1			Propranolol	Myeloablative	0	0	1	0	0	Acute Leukemia	163	24.08	136	20.14
376	F	59	Unrelated	05/12/2015	08/07/2015	01/05/2023		Followup	0		2795	2	No			Yes	BB Any No	BB Before No	BB After No	b.40-59	White	No	2	2.85246	0	91.6393	0	91.6393	0	91.6393			04/04/2016	2		Myeloablative	1	0	0	0	0	Chronic Leukemia	202	36.52	190	34.27	4.2		-8
377	M	64	Unrelated	03/08/2014	05/23/2014	06/04/2016	06/04/2016	Dead	1	Recurrent or Persistent Disease	819	3	No			Unknown	BB Any No	BB Before No	BB After No	c.>=60	White	No	3	2.4918	1	26.8525	1	26.8525	0	26.8525	05/12/2014	2	01/08/2015	2		Non-myeloablative	0	0	0	1	0	MDS/MPN	209	26.82	201	25.8	4.1		-9
378	M	47	Related	10/03/2013	01/17/2014	11/27/2014	11/27/2014	Dead	1		420	4	No			Unknown	BB Any No	BB Before No	BB After No	b.40-59	White	No	4	3.47541	1	13.7705	1	13.7705	0	13.7705	12/20/2013	2	02/26/2014	2		Non-myeloablative	0	0	0	1	0	Lymphoma	241	36.73	215	30.84
379	M	25	Unrelated	12/19/2013	03/14/2014	01/01/2015	01/01/2015	Dead	1		378	2	No			Unknown	BB Any No	BB Before No	BB After No	a.<=39	White	No	2	2.78689	1	12.3934	1	12.3934	0	12.3934						Myeloablative	1	0	0	0	0	Acute Leukemia	192	26.58	168	23.46
380	M	62	Unrelated	12/11/2013	02/26/2014	04/01/2022		Followup	0		3033	0	No			Yes	BB Any Yes	BB Before Yes	BB After Yes	c.>=60	White	No	0	2.52459	0	99.4426	0	99.4426	0	99.4426	01/27/2014	1	07/10/2014	2	Atenolol	Reduced Intensity	1	0	0	0	0	MDS/MPN	251	31.19	238	28.64
381	M	46	Related	10/17/2013	01/23/2014	12/12/2018		Followup	0		1882	1	No			Unknown	BB Any No	BB Before No	BB After No	b.40-59	White	No	1	3.21311	0	61.7049	0	61.7049	0	61.7049	01/02/2014	2				Non-myeloablative	0	0	0	1	0	Lymphoma	181	25.28	172	24.93
382	M	26	Unrelated	01/06/2014	04/01/2014	07/07/2016	07/07/2016	Dead	1	Infection	913	2	No			Yes	BB Any Yes	BB Before Yes	BB After Yes	a.<=39	White	No	2	2.78689	1	29.9344	1	29.9344	0	29.9344	03/17/2014	1	05/14/2014	2	Metoprolol	Non-myeloablative	0	0	0	1	0	Other	149	24.1	144	22.93	4.4		-7
383	M	56	Related	11/05/2013	02/04/2014	01/11/2015	01/11/2015	Dead	1	Recurrent or Persistent Disease	432	6	No			Unknown	BB Any No	BB Before No	BB After No	b.40-59	White	No	4	2.98361	1	14.1639	1	14.1639	0	14.1639						Myeloablative	1	0	0	0	0	Lymphoma	196	29.02	172	24.71
384	M	35	Unrelated	10/11/2013	01/02/2014	01/26/2015	01/26/2015	Dead	1	Recurrent or Persistent Disease	472	2	Yes	03JUL2014	265	Unknown	BB Any No	BB Before No	BB After No	a.<=39	White	No	2	2.72131	1	15.4754	0	8.68852	1	8.68852	01/08/2014	1	07/03/2014	1		Myeloablative	0	0	1	0	0	Acute Leukemia	247	38.66	223	35.02
385	M	51	Unrelated	02/19/2014	08/25/2014	04/19/2020	04/19/2020	Dead	1	GVHD	2251	3	No			Yes	BB Any Yes	BB Before Yes	BB After Yes	b.40-59	White	No	3	6.13115	1	73.8033	1	73.8033	0	73.8033	03/07/2014	2	05/16/2014	2	Metoprolol	Myeloablative	1	0	0	0	0	Lymphoma	200	29.01	170	23.75	3.9		-9
386	F	47	Related	10/15/2013	01/16/2014	05/22/2019		Followup	0		2045	1	No			Unknown	BB Any No	BB Before No	BB After No	b.40-59	White	No	1	3.04918	0	67.0492	0	67.0492	0	67.0492						Non-myeloablative	1	0	0	0	0	Acute Leukemia	127	21.64	129	22.09
387	F	47	Related	10/31/2013	01/21/2014	06/17/2017	06/17/2017	Dead	1	Recurrent or Persistent Disease	1325	2	No			Unknown	BB Any No	BB Before No	BB After No	b.40-59	White	No	2	2.68852	1	43.4426	1	43.4426	0	43.4426			05/07/2014	2		Myeloablative	1	0	0	0	0	Acute Leukemia	140	28.31	132	26.62
388	F	54	Unrelated	01/07/2015	03/15/2015	03/14/2015	03/14/2015	Dead	1	Infection	66	4	No			Yes	BB Any Yes	BB Before No	BB After Yes	b.40-59	White	No	4	2.19672	1	2.16393	1	2.16393	0	2.16393	01/23/2015	2				Non-myeloablative	0	0	0	0	1	Acute Leukemia	183	27.86			4.3		-9
389	M	74	Related	03/18/2014	12/04/2014	05/09/2015	05/09/2015	Dead	1	Infection	417	7	No			Unknown	BB Any No	BB Before No	BB After No	c.>=60	White	No	4	8.55738	1	13.6721	1	13.6721	0	13.6721	05/07/2014	2	04/06/2015	2		Non-myeloablative	0	0	0	1	0	MDS/MPN	203	26	164	21.25	3.5		-10
390	M	61	Related	11/13/2013	02/03/2014	12/15/2016		Followup	0		1128	4	No			Unknown	BB Any No	BB Before No	BB After No	c.>=60	White	No	4	2.68852	0	36.9836	0	36.9836	0	36.9836	02/17/2014	2				Non-myeloablative	0	0	0	1	0	Acute Leukemia	198	29.19	192	28.44
391	M	34	Related	12/15/2015	03/17/2016	12/05/2022		Followup	0		2547	6	No			Yes	BB Any Yes	BB Before No	BB After Yes	a.<=39	White	No	4	3.04918	0	83.5082	0	83.5082	0	83.5082	01/04/2016	2	09/13/2017	2		Myeloablative	1	0	0	0	0	Lymphoma	213	28.17	208	27.02	3.2	L	-8
392	F	45	Unrelated	03/21/2014	06/17/2014	06/17/2014	06/17/2014	Dead	1	GVHD	88	2	No			Yes	BB Any Yes	BB Before No	BB After Yes	b.40-59	Black	No	2	2.88525	1	2.88525	1	2.88525	0	2.88525	04/11/2014	3				Myeloablative	0	0	1	0	0	Chronic Leukemia	97	16.64	149	24.68	3.7		-8
393	F	66	Unrelated	02/19/2014	06/02/2014	03/12/2019		Followup	0		1847	2	No			Unknown	BB Any No	BB Before No	BB After No	c.>=60	White	No	2	3.37705	0	60.5574	0	60.5574	0	60.5574	03/13/2014	2	06/23/2014	2		Myeloablative	0	0	1	0	0	Acute Leukemia	128	20.04	127	20.48	4.1		-9
394	F	49	Unrelated	12/11/2013	03/03/2014	12/17/2018		Followup	0		1832	4	No			Unknown	BB Any No	BB Before No	BB After No	b.40-59	White	No	4	2.68852	0	60.0656	0	60.0656	0	60.0656	01/20/2014	1				Myeloablative	1	0	0	0	0	MDS/MPN	136	20.65	127	19.85
395	M	60	Unrelated	01/30/2014	05/27/2014	02/20/2019		Followup	0		1847	3	No			Unknown	BB Any No	BB Before No	BB After No	c.>=60	White	No	3	3.83607	0	60.5574	0	60.5574	0	60.5574	04/18/2014	2				Myeloablative	1	0	0	0	0	Acute Leukemia	262	34.28	216	27.76	4.9	H	-10
396	F	60	Related	01/17/2014	04/18/2014	12/20/2016	12/20/2016	Dead	1	Organ Failure	1068	4	No			Unknown	BB Any No	BB Before No	BB After No	c.>=60	White	No	4	2.98361	1	35.0164	1	35.0164	0	35.0164			07/11/2014	2		Non-myeloablative	0	0	1	0	0	MDS/MPN	233	38.32	188	31.18	3.1	L	-8
397	M	54	Unrelated	03/12/2014	04/23/2014	04/23/2014	04/23/2014	Dead	1	Organ Failure	42	6	No			Yes	BB Any Yes	BB Before No	BB After Yes	b.40-59	White	No	4	1.37705	1	1.37705	1	1.37705	0	1.37705						Reduced Intensity	0	0	1	0	0	Acute Leukemia	267	38.07			4		-9
398	F	61	Unrelated	03/07/2014	07/14/2014	12/22/2014	12/22/2014	Dead	1	Other/Unknown	290	4	No			Yes	BB Any Yes	BB Before No	BB After Yes	c.>=60	White	No	4	4.22951	1	9.5082	1	9.5082	0	9.5082	04/08/2014	3				Non-myeloablative	0	0	0	1	0	Acute Leukemia	198	32.95	192	32.82	4		-8
399	F	23	Unrelated	12/16/2014	03/25/2015	12/19/2018		Followup	0		1464	5	No			Unknown	BB Any No	BB Before No	BB After No	a.<=39	White	No	4	3.2459	0	48	0	48	0	48	01/27/2015	2	03/30/2015	2		Myeloablative	1	0	0	0	0	Acute Leukemia	181	27.56	172	26.4	4.5		-8
400	M	35	Unrelated	02/14/2014	06/16/2014	11/05/2014	11/05/2014	Dead	1	Other/Unknown	264	5	No			Yes	BB Any Yes	BB Before No	BB After Yes	a.<=39	White	No	4	4	1	8.65574	1	8.65574	0	8.65574	03/05/2014	3				Myeloablative	1	0	0	0	0	Acute Leukemia	341	43.25	353	46.78	3.8		-9
401	M	64	Unrelated	01/23/2014	05/19/2014	05/27/2014	05/27/2014	Dead	1		124	3	No			Unknown	BB Any No	BB Before No	BB After No	c.>=60	White	No	3	3.80328	1	4.06557	1	4.06557	0	4.06557	02/05/2014	1				Reduced Intensity	0	0	1	0	0	Acute Leukemia	337	34.98	292	30.31	4.9	H	-8
402	F	46	Unrelated	12/14/2016	03/20/2017	10/18/2021	10/18/2021	Followup	0		1769	7	No			Yes	BB Any No	BB Before No	BB After No	b.40-59	White	No	4	3.14754	0	58	0	58	0	58	01/18/2017	2	05/16/2018	2		Myeloablative	1	0	0	0	0	Acute Leukemia	256	46.88	225	41.44	4		-8
403	F	64	Related	04/02/2014	06/24/2014	12/29/2014	12/29/2014	Dead	1	GVHD	271	2	No			Unknown	BB Any Yes	BB Before Yes	BB After Yes	c.>=60	White	No	2	2.72131	1	8.88525	1	8.88525	0	8.88525	11/03/2014	3	09/25/2014	2	btype_other	Non-myeloablative	0	0	0	1	0	MDS/MPN	179	29.39	156	25.68	3.9		-6
404	M	67	Unrelated	02/11/2014	06/18/2014	06/22/2014	06/22/2014	Dead	1	GVHD	131	2	No			Unknown	BB Any No	BB Before No	BB After No	c.>=60	White	No	2	4.16393	1	4.29508	1	4.29508	0	4.29508	04/07/2014	4				Non-myeloablative	0	0	0	1	0	Acute Leukemia	190	27.88	138	19.83	4.8		-8
405	M	64	Related	02/05/2014	06/19/2014	06/22/2014	06/22/2014	Dead	1	GVHD	137	4	No			Unknown	BB Any No	BB Before No	BB After No	c.>=60	White	No	4	4.39344	1	4.4918	1	4.4918	0	4.4918	03/26/2014	5				Non-myeloablative	0	0	0	1	0	Acute Leukemia	227	31.82			3.9		-6
406	M	71	Unrelated	02/11/2014	06/25/2014	05/08/2015	05/08/2015	Dead	1	GVHD	451	5	No			Unknown	BB Any No	BB Before No	BB After No	c.>=60	White	No	4	4.39344	1	14.7869	1	14.7869	0	14.7869	04/04/2014	3	02/18/2015	2		Non-myeloablative	0	0	0	1	0	MDS/MPN	184	28.54	236	36.17	4.1		-15
407	F	60	Related	04/08/2014	06/16/2014	05/06/2019		Followup	0		1854	2	No			Unknown	BB Any No	BB Before No	BB After No	c.>=60	White	No	2	2.2623	0	60.7869	0	60.7869	0	60.7869	07/14/2014	2	07/21/2014	1		Non-myeloablative	0	0	0	1	0	Acute Leukemia	149	25.1	152	29.07	4.4		-8
408	F	27	Related	05/07/2014	08/07/2014	11/18/2022		Followup	0		3117	4	No			Yes	BB Any No	BB Before No	BB After No	a.<=39	Black	No	4	3.01639	0	102.197	0	102.197	0	102.197	05/28/2014	1	11/10/2014	1		Myeloablative	1	0	0	0	0	Other	201	35.11	221	38.9	3.2	L	-8
409	F	51	Unrelated	08/23/2017	11/24/2017	01/03/2023		Followup	0		1959	6	No			Yes	BB Any Yes	BB Before No	BB After Yes	b.40-59	White	No	4	3.04918	0	64.2295	0	64.2295	0	64.2295						Myeloablative	1	0	0	0	0	Acute Leukemia	127	20.44	123	19.97	4		-7
410	F	49	Unrelated	05/23/2014	08/26/2014	02/27/2021	02/27/2021	Followup	0		2472	4	No			Yes	BB Any No	BB Before No	BB After No	b.40-59	z.Other/Unknown	No	4	3.11475	0	81.0492	0	81.0492	0	81.0492			07/23/2015	2		Myeloablative	1	0	0	0	0	Acute Leukemia	150	25.05	138	24.07	4.3		-8
411	F	60	Unrelated	05/13/2014	08/21/2014	03/15/2016	03/15/2016	Dead	1	Recurrent or Persistent Disease	672	4	No			Yes	BB Any Yes	BB Before Yes	BB After Yes	c.>=60	White	No	4	3.27869	1	22.0328	1	22.0328	0	22.0328			10/30/2014	2	Carvedilol	Myeloablative	1	0	0	0	0	Other	157	27.47	155	25.44	3.4	L	-6
412	F	40	Unrelated	04/16/2014	07/08/2014	03/29/2019		Followup	0		1808	3	No			Unknown	BB Any No	BB Before No	BB After No	b.40-59	White	No	3	2.72131	0	59.2787	0	59.2787	0	59.2787						Myeloablative	1	0	0	0	0	Acute Leukemia	187	27.94	184	27.11	3.2	L	-7
413	M	58	Related	04/21/2014	07/08/2014	07/08/2014	07/08/2014	Dead	1	Other/Unknown	78	3	No			Yes	BB Any No	BB Before No	BB After No	b.40-59	Black	No	3	2.55738	1	2.55738	1	2.55738	0	2.55738	06/06/2014	2				Reduced Intensity	1	0	0	0	0	Chronic Leukemia	204	29.59	198	30.07	4.5		-6
414	M	62	Unrelated	06/05/2014	09/12/2014	06/13/2019		Followup	0		1834	6	No			Unknown	BB Any No	BB Before No	BB After No	c.>=60	White	No	4	3.2459	0	60.1311	0	60.1311	0	60.1311			03/02/2015	1		Reduced Intensity	1	0	0	0	0	Acute Leukemia	214	29.02	193	27.31	3.7		-7
415	F	34	Unrelated	04/18/2014	06/10/2014	05/06/2015		Followup	0		383	0	No			Unknown	BB Any No	BB Before No	BB After No	a.<=39	White	No	0	1.7377	0	12.5574	0	12.5574	0	12.5574						Myeloablative	0	0	0	0	1	MDS/MPN	163	24.95	145	23.24	4.2		-10
416	F	64	Related	02/20/2015	05/12/2015	07/08/2021		Followup	0		2330	3	No			Yes	BB Any Yes	BB Before Yes	BB After Yes	c.>=60	White	No	3	2.65574	0	76.3934	0	76.3934	0	76.3934	08/12/2015	2	05/06/2016	1	Metoprolol	Non-myeloablative	0	0	1	0	0	Acute Leukemia	139	25.44	124	22.7	3.7		-9
417	F	68	Unrelated	01/16/2015	04/16/2015	05/26/2017	05/26/2017	Dead	1	Recurrent or Persistent Disease	861	2	No			Unknown	BB Any No	BB Before No	BB After No	c.>=60	White	No	2	2.95082	1	28.2295	1	28.2295	0	28.2295	02/27/2015	2	05/09/2016	2		Non-myeloablative	0	0	1	0	0	MDS/MPN	135	24.25	121	21.8	4.1		-11
418	M	26	Unrelated	10/15/2014	01/12/2015	12/30/2019		Followup	0		1902	3	No			Unknown	BB Any No	BB Before No	BB After No	a.<=39	White	No	3	2.91803	0	62.3607	0	62.3607	0	62.3607	11/20/2014	2	04/25/2016	2		Myeloablative	1	0	0	0	0	Lymphoma	154	23.09	155	22.69	3.7		-9
419	F	27	Unrelated	06/24/2014	11/19/2014	02/16/2016	02/16/2016	Dead	1	Infection	602	2	No			Unknown	BB Any No	BB Before No	BB After No	a.<=39	White	No	2	4.85246	1	19.7377	1	19.7377	0	19.7377	07/30/2014	4	12/18/2014	2		Non-myeloablative	0	0	0	1	0	Lymphoma	137	20.84	130	20.47	4.3		-7
420	F	39	Unrelated	05/23/2014	08/19/2014	12/26/2022		Followup	0		3139	3	No			No	BB Any Yes	BB Before Yes	BB After Yes	a.<=39	White	No	3	2.88525	0	102.918	0	102.918	0	102.918	06/02/2014	1	01/29/2015	2	Propranolol	Myeloablative	0	0	1	0	0	Acute Leukemia	144	26.12	139	25.08	4.5		-10
421	F	57	Related	04/28/2015	07/18/2015	07/18/2015	07/18/2015	Dead	1	GVHD	81	2	No			Yes	BB Any No	BB Before No	BB After No	b.40-59	Black	No	2	2.65574	1	2.65574	1	2.65574	0	2.65574	05/29/2015	4				Myeloablative	1	0	0	0	0	Chronic Leukemia	179	31.68	193	34.22	4.7		-8
422	F	27	Unrelated	11/20/2014	03/16/2015	06/28/2022		Followup	0		2777	5	No			Yes	BB Any Yes	BB Before Yes	BB After Yes	a.<=39	z.Other/Unknown	No	4	3.80328	0	91.0492	0	91.0492	0	91.0492	12/05/2014	1	11/15/2016	1	btype_other	Myeloablative	0	0	1	0	0	Other	172	29.46	154	26.72	3.4	L	-10
423	F	47	Related	04/23/2014	06/23/2014	09/01/2014	09/01/2014	Dead	1		131	1	No			Unknown	BB Any No	BB Before No	BB After No	b.40-59	White	No	1	2	1	4.29508	1	4.29508	0	4.29508	05/23/2014	2				Myeloablative	1	0	0	0	0	Acute Leukemia	180	30.41	160	27.66	3.4	L	-8
424	M	51	Unrelated	12/08/2015	03/24/2016	01/17/2019		Followup	0		1136	1	No			Unknown	BB Any No	BB Before No	BB After No	b.40-59	White	No	1	3.5082	0	37.2459	0	37.2459	0	37.2459						Myeloablative	1	0	0	0	0	Acute Leukemia	298	43.93	300	44.63	3.5		-8
425	F	58	Unrelated	03/27/2015	08/12/2015	06/04/2019		Followup	0		1530	4	No			Unknown	BB Any No	BB Before No	BB After No	b.40-59	Black	No	4	4.52459	0	50.1639	0	50.1639	0	50.1639						Non-myeloablative	0	0	0	1	0	Other	252	41.44	232	39.39	2.5	L	-11
426	F	65	Related	06/10/2014	09/15/2014	06/29/2022		Followup	0		2941	3	No			Yes	BB Any No	BB Before No	BB After No	c.>=60	White	No	3	3.18033	0	96.4262	0	96.4262	0	96.4262			04/09/2015	2		Myeloablative	1	0	0	0	0	Acute Leukemia	210	38.16	194	36.59	4.2		-12
427	F	56	Unrelated	07/02/2014	10/07/2014	03/02/2015	03/02/2015	Dead	1	Recurrent or Persistent Disease	243	5	No			Yes	BB Any Yes	BB Before No	BB After Yes	b.40-59	Black	No	4	3.18033	1	7.96721	1	7.96721	0	7.96721	08/06/2014	2				Myeloablative	0	0	1	0	0	Acute Leukemia	217	40.39	184	35.95	3.3	L	-9
428	F	67	Unrelated	08/26/2014	12/31/2014	08/13/2019		Followup	0		1813	4	No			Unknown	BB Any No	BB Before No	BB After No	c.>=60	z.Other/Unknown	No	4	4.16393	0	59.4426	0	59.4426	0	59.4426	10/03/2014	2	01/20/2015	2		Non-myeloablative	0	0	1	0	0	Acute Leukemia	110	22.22	110	22.18	3.9		-11
429	F	36	Unrelated	07/23/2014	05/15/2015	05/15/2015	05/15/2015	Dead	1	GVHD	296	7	No			Unknown	BB Any No	BB Before No	BB After No	a.<=39	White	No	4	9.70492	1	9.70492	1	9.70492	0	9.70492	09/16/2014	2	12/05/2014	1		Myeloablative	1	0	0	0	0	Acute Leukemia	130	22.97	124	21.23	3.6		-10
430	M	50	Related	07/15/2015	10/06/2015	02/24/2020		Followup	0		1685	3	No			Unknown	BB Any No	BB Before No	BB After No	b.40-59	White	No	3	2.72131	0	55.2459	0	55.2459	0	55.2459	07/31/2015	1	06/21/2016	2		Myeloablative	1	0	0	0	0	Chronic Leukemia	217	27.11	188	24.18	4.5		-9
431	M	57	Unrelated	01/12/2018	04/05/2018	06/02/2018	06/02/2018	Dead	1	Recurrent or Persistent Disease	141	3	Yes	27MAR2018	74	Unknown	BB Any No	BB Before No	BB After No	b.40-59	White	No	3	2.72131	1	4.62295	0	2.42623	1	2.42623						Myeloablative	1	0	0	0	0	MDS/MPN	190	26.87	171	24.48	3.1	L	-10
432	M	56	Related	04/23/2019	07/11/2019	12/16/2019		Followup	0		237	3	No			Unknown	BB Any No	BB Before No	BB After No	b.40-59	White	No	3	2.59016	0	7.77049	0	7.77049	0	7.77049						Myeloablative	0	1	0	0	0	Lymphoma	156	21.17	138	19.57	3.8		-12
433	M	64	Related	10/09/2014	01/13/2015	03/08/2015	03/08/2015	Dead	1	Recurrent or Persistent Disease	150	5	No			Unknown	BB Any No	BB Before No	BB After No	c.>=60	White	No	4	3.14754	1	4.91803	1	4.91803	0	4.91803	11/10/2014	3				Non-myeloablative	0	1	0	0	0	MDS/MPN	197	26.99	179	25	4.7		-8
434	M	50	Unrelated	06/17/2014	09/08/2014	06/19/2019		Followup	0		1828	2	No			Unknown	BB Any No	BB Before No	BB After No	b.40-59	White	No	2	2.72131	0	59.9344	0	59.9344	0	59.9344	07/05/2014	1				Myeloablative	1	0	0	0	0	Acute Leukemia	206	28.51	184	26.06	4.3		-10
435	M	67	Related	06/24/2014	09/11/2014	02/07/2022		Followup	0		2785	3	No			Yes	BB Any Yes	BB Before Yes	BB After Yes	c.>=60	Black	Yes	3	2.59016	0	91.3115	0	91.3115	0	91.3115			12/16/2015	1	Metoprolol	Myeloablative	1	0	0	0	0	Acute Leukemia	153	25.57	143	24.02	3.9		-12
436	F	51	Related	07/15/2014	01/09/2015	03/19/2015	03/19/2015	Dead	1	Recurrent or Persistent Disease	247	2	Yes	29OCT2014	106	Unknown	BB Any No	BB Before No	BB After No	b.40-59	White	No	2	5.83607	1	8.09836	0	3.47541	1	3.47541	08/21/2014	2				Myeloablative	1	0	0	0	0	Acute Leukemia	131	20.55	116	18.82	4.1		-8
437	M	62	Unrelated	12/13/2014	03/12/2015	09/11/2015	09/11/2015	Dead	1	GVHD	272	5	No			Unknown	BB Any No	BB Before No	BB After No	c.>=60	White	No	4	2.91803	1	8.91803	1	8.91803	0	8.91803	01/13/2015	2	04/23/2015	2		Reduced Intensity	1	0	0	0	0	MDS/MPN	235	30.19	223	28.73	4		-9
438	F	48	Unrelated	07/09/2014	10/06/2014	09/05/2019		Followup	0		1884	3	No			Unknown	BB Any No	BB Before No	BB After No	b.40-59	White	No	3	2.91803	0	61.7705	0	61.7705	0	61.7705			04/20/2015	2		Myeloablative	0	0	1	0	0	Other	202	32.42	184	30.08	3	L	-7
439	F	62	Unrelated	11/21/2014	02/24/2015	11/27/2018		Followup	0		1467	4	No			Unknown	BB Any No	BB Before No	BB After No	c.>=60	White	No	4	3.11475	0	48.0984	0	48.0984	0	48.0984			11/10/2016	2		Myeloablative	0	0	0	0	1	Other	179	27.16	192	29.75	4.5		-8
440	M	23	Related	07/15/2014	10/24/2014	10/03/2015	10/03/2015	Dead	1	GVHD	445	3	No			Unknown	BB Any No	BB Before No	BB After No	a.<=39	White	No	3	3.31148	1	14.5902	1	14.5902	0	14.5902	01/07/2015	3	02/19/2015	2		Myeloablative	0	0	0	0	1	Acute Leukemia	204	27.06	186	25.04	3.8		-8
441	M	48	Unrelated	06/24/2015	10/05/2015	11/01/2015	11/01/2015	Dead	1	Recurrent or Persistent Disease	130	2	No			Yes	BB Any Yes	BB Before No	BB After Yes	b.40-59	White	No	2	3.37705	1	4.2623	1	4.2623	0	4.2623						Myeloablative	0	0	1	0	0	Lymphoma	144	23.99	133	22.15	3.2	L	-9
442	M	40	Related	10/17/2014	01/16/2015	10/29/2019		Followup	0		1838	6	No			Unknown	BB Any No	BB Before No	BB After No	b.40-59	White	No	4	2.98361	0	60.2623	0	60.2623	0	60.2623			05/08/2015	2		Myeloablative	1	0	0	0	0	MDS/MPN	204	27.9	169	23.67	4.2		-9
443	F	46	Unrelated	02/07/2018	05/02/2018	05/02/2018	05/02/2018	Dead	1	GVHD	84	4	No			Unknown	BB Any No	BB Before No	BB After No	b.40-59	White	No	4	2.7541	1	2.7541	1	2.7541	0	2.7541	03/12/2018	3				Myeloablative	1	0	0	0	0	Chronic Leukemia	192	30.53			4.6		-9
444	F	39	Unrelated	09/23/2015	03/31/2016	01/09/2023		Followup	0		2665	4	No			No	BB Any Yes	BB Before No	BB After Yes	a.<=39	White	No	4	6.22951	0	87.377	0	87.377	0	87.377	10/14/2015	2	07/27/2018	2		Myeloablative	0	0	1	0	0	Acute Leukemia	153	27.8	143	26.04	3.2	L	-9
445	F	63	Unrelated	11/18/2014	03/24/2015	01/12/2016	01/12/2016	Dead	1	GVHD	420	4	No			Yes	BB Any Yes	BB Before Yes	BB After Yes	c.>=60	White	No	4	4.13115	1	13.7705	1	13.7705	0	13.7705	03/04/2015	2	12/11/2014	2	Metoprolol	Myeloablative	0	0	0	0	1	Other	125	19.5	126	20.88	3.9		-12
446	F	53	Unrelated	05/27/2015	11/11/2015	08/04/2022		Followup	0		2626	3	No			Yes	BB Any Yes	BB Before No	BB After Yes	b.40-59	White	No	3	5.5082	0	86.0984	0	86.0984	0	86.0984	07/08/2015	2	01/26/2016	1		Myeloablative	0	0	0	0	1	Acute Leukemia	135	24.48	144	28.03	3.6		-9
447	M	53	Related	10/21/2014	01/30/2015	09/17/2015	09/17/2015	Dead	1	Recurrent or Persistent Disease	331	3	No			Unknown	BB Any Yes	BB Before Yes	BB After Yes	b.40-59	White	No	3	3.31148	1	10.8525	1	10.8525	0	10.8525	12/03/2014	3			Propranolol	Myeloablative	1	0	0	0	0	Other	147	23.01	121	19.02	4		-10
448	F	26	Unrelated	07/01/2015	07/15/2015	07/15/2015	07/15/2015	Dead	1	Infection	14	3	No			Yes	BB Any Yes	BB Before Yes	BB After No	a.<=39	White	No	3	0.459016	1	0.459016	1	0.459016	0	0.459016					Carvedilol	Myeloablative	0	0	1	0	0	Acute Leukemia	124	20.08			3.1	L	-9
449	M	60	Related	09/24/2014	12/09/2014	03/21/2015	03/21/2015	Dead	1	Recurrent or Persistent Disease	178	9	Yes	12JAN2015	110	Unknown	BB Any No	BB Before No	BB After No	c.>=60	White	No	4	2.4918	1	5.83607	0	3.60656	1	3.60656	12/03/2014	1				Non-myeloablative	0	0	1	0	0	Acute Leukemia	219	36.43	200	33.39	3.8		-12
450	F	61	Related	10/10/2014	01/28/2015	10/08/2019		Followup	0		1824	3	No			Unknown	BB Any No	BB Before No	BB After No	c.>=60	White	No	3	3.60656	0	59.8033	0	59.8033	0	59.8033						Non-myeloablative	0	1	0	0	0	MDS/MPN	112	20.96	103	18.91	4.8		-8
451	M	69	Unrelated	11/04/2015	02/01/2016	01/05/2023		Followup	0		2619	3	No			Yes	BB Any Yes	BB Before No	BB After Yes	c.>=60	White	No	3	2.91803	0	85.8689	0	85.8689	0	85.8689	12/01/2015	2	04/15/2016	2		Reduced Intensity	1	0	0	0	0	Acute Leukemia	163	24.44	149	22.03	4.1		-6
452	F	20	Unrelated	10/22/2014	02/13/2015	09/24/2016	09/24/2016	Dead	1	Recurrent or Persistent Disease	703	3	No			Unknown	BB Any No	BB Before No	BB After No	a.<=39	White	No	3	3.7377	1	23.0492	1	23.0492	0	23.0492	11/25/2014	2				Myeloablative	1	0	0	0	0	Acute Leukemia	121	18.88	143	23.55	4.6		-9
453	F	60	Unrelated	01/14/2015	03/31/2015	12/13/2018		Followup	0		1429	3	No			Unknown	BB Any No	BB Before No	BB After No	c.>=60	White	No	3	2.4918	0	46.8525	0	46.8525	0	46.8525	02/27/2015	2	09/03/2015	2		Myeloablative	1	0	0	0	0	MDS/MPN	152	25.69	133	22.25	4		-7
454	F	47	Related	10/30/2014	01/30/2015	09/23/2019		Followup	0		1789	4	No			Unknown	BB Any No	BB Before No	BB After No	b.40-59	White	No	4	3.01639	0	58.6557	0	58.6557	0	58.6557	12/03/2014	2	08/31/2015	2		Myeloablative	1	0	0	0	0	MDS/MPN	189	30.29	167	27.84	3.8		-10
455	M	54	Unrelated	02/03/2016	05/03/2016	12/19/2022		Followup	0		2511	4	No			Yes	BB Any No	BB Before No	BB After No	b.40-59	z.Other/Unknown	No	4	2.95082	0	82.3279	0	82.3279	0	82.3279			11/23/2016	2		Non-myeloablative	1	0	0	0	0	Acute Leukemia	182	31.4	164	28.14	3.9		-8
456	M	56	Related	12/03/2014	03/02/2015	08/27/2018	08/27/2018	Dead	1	Recurrent or Persistent Disease	1363	1	No			Yes	BB Any Yes	BB Before No	BB After Yes	b.40-59	White	No	1	2.91803	1	44.6885	1	44.6885	0	44.6885	04/14/2015	2	04/28/2015	2		Myeloablative	1	0	0	0	0	MDS/MPN	204	28.84	195	28.28	5	H	-9
457	M	58	Related	11/07/2014	02/05/2015	01/24/2022		Followup	0		2635	3	No			Yes	BB Any No	BB Before No	BB After No	b.40-59	White	No	3	2.95082	0	86.3934	0	86.3934	0	86.3934						Myeloablative	1	0	0	0	0	Acute Leukemia	160	23.91	164	24.28	4.4		-11
458	F	56	Unrelated	01/30/2015	04/30/2015	12/19/2022		Followup	0		2880	3	No			Yes	BB Any Yes	BB Before Yes	BB After Yes	b.40-59	Black	No	3	2.95082	0	94.4262	0	94.4262	0	94.4262	03/26/2015	2	01/19/2016	2	Carvedilol	Myeloablative	1	0	0	0	0	Lymphoma	240	38.16	214	32.79	3.5		-9
459	M	53	Related	10/29/2014	01/29/2015	08/08/2015	08/08/2015	Dead	1	Recurrent or Persistent Disease	283	3	Yes	16APR2015	169	Yes	BB Any Yes	BB Before Yes	BB After Yes	b.40-59	White	No	3	3.01639	1	9.27869	0	5.54098	1	5.54098	05/27/2015	3			Atenolol	Myeloablative	1	0	0	0	0	Acute Leukemia	196	28.96	169	24.07	4.5		-14
460	F	80	Unrelated	12/18/2014	03/16/2015	01/30/2016	01/30/2016	Dead	1	Infection	408	1	No			Yes	BB Any No	BB Before No	BB After No	c.>=60	White	z.Unknown	1	2.88525	1	13.377	1	13.377	0	13.377			05/11/2015	2		Reduced Intensity	0	0	0	0	1	Acute Leukemia	173	32.22	164	31.05	3.3	L	-10
461	M	71	Related	03/25/2015	05/27/2015	06/03/2015	06/03/2015	Dead	1		70	5	No			Unknown	BB Any No	BB Before No	BB After No	c.>=60	Black	No	4	2.06557	1	2.29508	1	2.29508	0	2.29508	04/28/2015	4				Non-myeloablative	0	0	0	1	0	Other	186	26.28			4.2		-9
462	F	27	Unrelated	10/31/2014	01/29/2015	10/18/2018		Followup	0		1448	2	No			Unknown	BB Any No	BB Before No	BB After No	a.<=39	White	No	2	2.95082	0	47.4754	0	47.4754	0	47.4754	07/01/2015	3	12/30/2015	2		Myeloablative	1	0	0	0	0	Acute Leukemia	139	23.1	140	23.61	3.2	L	-11
463	M	64	Unrelated	11/25/2014	02/24/2015	05/18/2017	05/18/2017	Dead	1	Infection	905	1	No			Yes	BB Any Yes	BB Before No	BB After Yes	c.>=60	White	No	1	2.98361	1	29.6721	1	29.6721	0	29.6721	01/12/2015	2	10/17/2015	2		Reduced Intensity	1	0	0	0	0	MDS/MPN	227	28.81	182	23.25	4.2		-8
464	M	37	Unrelated	11/19/2014	03/12/2015	12/18/2019		Followup	0		1855	0	No			Unknown	BB Any No	BB Before No	BB After No	a.<=39	White	No	0	3.70492	0	60.8197	0	60.8197	0	60.8197	01/05/2015	2	03/17/2015	2		Myeloablative	0	0	1	0	0	Acute Leukemia	183	23.48	174	22.32	4.3		-9
465	M	54	Unrelated	02/11/2015	05/01/2015	05/15/2015	05/15/2015	Dead	1	Recurrent or Persistent Disease	93	3	No			Unknown	BB Any No	BB Before No	BB After No	b.40-59	White	No	3	2.59016	1	3.04918	1	3.04918	0	3.04918	03/09/2015	1				Myeloablative	1	0	0	0	0	MDS/MPN	150	22.17	163	23.99	4		-9
466	F	39	Unrelated	09/22/2016	11/21/2016	10/03/2018		Followup	0		741	3	No			Unknown	BB Any No	BB Before No	BB After No	a.<=39	White	No	3	1.96721	0	24.2951	0	24.2951	0	24.2951	04/11/2017	1	08/29/2017	2		Myeloablative	1	0	0	0	0	Acute Leukemia	120	22.39	116	21.02	4.1		-7
467	F	51	Related	06/28/2016	09/23/2016	01/10/2023		Followup	0		2387	6	No			Yes	BB Any No	BB Before No	BB After No	b.40-59	White	No	4	2.85246	0	78.2623	0	78.2623	0	78.2623	07/13/2016	2	10/27/2016	2		Myeloablative	1	0	0	0	0	Acute Leukemia	117	19.23	120	18.61	3.7		-12
468	F	54	Related	01/26/2016	05/04/2016	01/24/2019		Followup	0		1094	2	No			Unknown	BB Any No	BB Before No	BB After No	b.40-59	White	No	2	3.2459	0	35.8689	0	35.8689	0	35.8689			05/11/2016	1		Myeloablative	1	0	0	0	0	Acute Leukemia	157	28.07	143	25.27	3.9		-7
469	M	25	Unrelated	01/28/2015	04/03/2015	04/11/2015	04/11/2015	Dead	1	Recurrent or Persistent Disease	73	3	No			No	BB Any No	BB Before No	BB After No	a.<=39	White	No	3	2.13115	1	2.39344	1	2.39344	0	2.39344						Myeloablative	1	0	0	0	0	Acute Leukemia	176	23.61			3.2	L	-7
470	M	23	Related	10/21/2014	02/25/2015	03/07/2015	03/07/2015	Dead	1	Recurrent or Persistent Disease	137	2	No			Unknown	BB Any No	BB Before No	BB After No	a.<=39	White	No	2	4.16393	1	4.4918	1	4.4918	0	4.4918						Myeloablative	1	0	0	0	0	Acute Leukemia	174	23.11	155	20.54	3.8		-8
471	M	68	Related	06/16/2016	09/12/2016	07/29/2020		Followup	0		1504	3	No			Yes	BB Any Yes	BB Before Yes	BB After No	c.>=60	White	No	3	2.88525	0	49.3115	0	49.3115	0	49.3115	07/08/2016	2			Metoprolol	Myeloablative	1	0	0	0	0	Acute Leukemia	153	24.74	153	24.01	3.9		-10
472	M	52	Related	02/24/2015	06/02/2015	02/24/2020		Followup	0		1826	2	No			Unknown	BB Any No	BB Before No	BB After No	b.40-59	White	No	2	3.21311	0	59.8689	0	59.8689	0	59.8689	05/08/2015	2	02/08/2016	2		Myeloablative	1	0	0	0	0	Acute Leukemia	156	25.31	149	24.17	3.8		-6
473	F	61	Unrelated	03/11/2015	06/19/2015	03/08/2016	03/08/2016	Dead	1	Recurrent or Persistent Disease	363	7	No			Unknown	BB Any No	BB Before No	BB After No	c.>=60	White	No	4	3.27869	1	11.9016	1	11.9016	0	11.9016						Myeloablative	0	0	1	0	0	MDS/MPN	190	33.18	173	30.25	3.1	L	-10
474	M	42	Unrelated	02/11/2015	04/05/2015	04/05/2015	04/05/2015	Dead	1	GVHD	53	2	No			Yes	BB Any Yes	BB Before No	BB After Yes	b.40-59	White	No	2	1.7377	1	1.7377	1	1.7377	0	1.7377	03/30/2015	4				Myeloablative	0	0	1	0	0	Acute Leukemia	226	31.59			3.4	L	-9
475	M	54	Related	03/03/2015	04/24/2015	04/27/2015	04/27/2015	Dead	1		55	3	No			Unknown	BB Any No	BB Before No	BB After No	b.40-59	Black	z.Unknown	3	1.70492	1	1.80328	1	1.80328	0	1.80328						Non-myeloablative	0	1	0	0	0	MDS/MPN	213	28.07			4.3		-7
476	F	59	Related	07/07/2015	08/24/2015	08/25/2015	08/25/2015	Dead	1	GVHD	49	3	No			Yes	BB Any No	BB Before No	BB After No	b.40-59	White	No	3	1.57377	1	1.60656	1	1.60656	0	1.60656	08/01/2015	4				Myeloablative	0	1	0	0	0	MDS/MPN	167	29.59			3.4	L	-8
477	M	43	Related	01/06/2015	03/15/2015	07/28/2015	07/28/2015	Dead	1	Recurrent or Persistent Disease	203	3	Yes	18FEB2015	43	Unknown	BB Any No	BB Before No	BB After No	b.40-59	White	No	3	2.22951	1	6.65574	0	1.40984	1	1.40984						Myeloablative	1	0	0	0	0	Lymphoma	209	25.72	180	23.14	3.5		-9
478	F	61	Unrelated	02/26/2015	04/09/2015	04/11/2015	04/11/2015	Dead	1		44	5	No			Unknown	BB Any No	BB Before No	BB After No	c.>=60	White	No	4	1.37705	1	1.44262	1	1.44262	0	1.44262						Non-myeloablative	0	0	1	0	0	MDS/MPN	202	32.53			4		-8
479	F	24	Unrelated	03/12/2015	07/28/2015	11/11/2016	11/11/2016	Dead	1	Infection	610	4	No			Yes	BB Any Yes	BB Before Yes	BB After Yes	a.<=39	White	No	4	4.52459	1	20	1	20	0	20					Metoprolol	Myeloablative	0	0	1	0	0	Acute Leukemia	139	20.5	137	20.63	3.4	L	-10
480	F	50	Related	01/13/2015	04/09/2015	01/11/2019		Followup	0		1459	1	No			Unknown	BB Any No	BB Before No	BB After No	b.40-59	White	z.Unknown	1	2.81967	0	47.8361	0	47.8361	0	47.8361	09/22/2015	1	04/11/2016	2		Myeloablative	1	0	0	0	0	MDS/MPN	138	24.45	129	24.39	4.3		-7
481	F	69	Related	02/10/2015	05/13/2015	10/07/2017	10/07/2017	Dead	1	Recurrent or Persistent Disease	970	2	No			Yes	BB Any No	BB Before No	BB After No	c.>=60	Black	No	2	3.01639	1	31.8033	1	31.8033	0	31.8033						Non-myeloablative	0	1	0	0	0	Acute Leukemia	172	30.13	146	26.23	4.2		-7
482	M	61	Related	07/13/2015	09/21/2015	09/23/2020	09/23/2020	Dead	1	Other/Unknown	1899	7	No			Yes	BB Any Yes	BB Before No	BB After No	c.>=60	White	No	4	2.29508	1	62.2623	1	62.2623	0	62.2623	12/17/2015	1	12/17/2015	2		Myeloablative	1	0	0	0	0	MDS/MPN	204	30.13	197	29.41	4		-6
483	M	66	Unrelated	10/07/2015	01/07/2016	04/07/2023		Followup	0		2739	4	No			Yes	BB Any No	BB Before No	BB After No	c.>=60	White	No	4	3.01639	0	89.8033	0	89.8033	0	89.8033	11/12/2015	1				Myeloablative	1	0	0	0	0	Other	179	25.04	200	28.56	4.4		-8
484	F	62	Unrelated	06/16/2015	09/14/2015	05/16/2019	05/16/2019	Dead	1	Infection	1430	5	No			Unknown	BB Any Yes	BB Before Yes	BB After Yes	c.>=60	Black	No	4	2.95082	1	46.8852	1	46.8852	0	46.8852	07/24/2015	2	05/19/2016	2	Metoprolol	Myeloablative	1	0	0	0	0	MDS/MPN	135	25.27	112	21.21	3.8		-11
485	M	47	Related	03/03/2015	05/12/2015	04/02/2021		Followup	0		2222	1	No			Yes	BB Any Yes	BB Before Yes	BB After Yes	b.40-59	White	No	1	2.29508	0	72.8525	0	72.8525	0	72.8525	05/11/2015	2	06/19/2015	1	Metoprolol	Myeloablative	1	0	0	0	0	Acute Leukemia	357	48.88	312	42.72	4.3		-11
486	F	50	Related	08/19/2015	11/19/2015	02/12/2016	02/12/2016	Dead	1	Other/Unknown	177	4	No			Yes	BB Any No	BB Before No	BB After No	b.40-59	White	No	4	3.01639	1	5.80328	1	5.80328	0	5.80328						Myeloablative	1	0	0	0	0	Acute Leukemia	214	39.9	197	37.49	4.1		-9
487	F	29	Unrelated	03/31/2015	06/25/2015	04/16/2016	04/16/2016	Dead	1	Organ Failure	382	3	No			Yes	BB Any No	BB Before No	BB After No	a.<=39	White	No	3	2.81967	1	12.5246	1	12.5246	0	12.5246	08/17/2015	2	10/12/2015	2		Myeloablative	1	0	0	0	0	Lymphoma	200	28.01	167	24.19	3.9		-11
488	M	68	Unrelated	10/28/2015	01/08/2016	10/10/2019		Followup	0		1443	3	No			Unknown	BB Any No	BB Before No	BB After No	c.>=60	White	No	3	2.36066	0	47.3115	0	47.3115	0	47.3115	11/27/2015	1				Myeloablative	1	0	0	0	0	MDS/MPN	194	25.11	176	23.75	3.4	L	-9
489	M	48	Unrelated	04/28/2016	07/26/2016	10/29/2022	10/29/2022	Dead	1	Infection	2375	2	No			Yes	BB Any Yes	BB Before Yes	BB After Yes	b.40-59	White	No	2	2.91803	1	77.8689	1	77.8689	0	77.8689			11/28/2016	1	Carvedilol	Myeloablative	1	0	0	0	0	Acute Leukemia	221	29.86	220	29.06	3.8		-10
490	F	48	Related	02/24/2015	06/14/2015	03/22/2016	03/22/2016	Dead	1	Recurrent or Persistent Disease	392	3	No			Yes	BB Any Yes	BB Before No	BB After Yes	b.40-59	White	No	3	3.60656	1	12.8525	1	12.8525	0	12.8525	03/19/2015	2				Myeloablative	1	0	0	0	0	Acute Leukemia	127	23.2	115	21.18	3.3	L	-9
491	F	49	Unrelated	11/24/2015	06/07/2016	05/02/2017	05/02/2017	Dead	1	Recurrent or Persistent Disease	525	3	No			Unknown	BB Any No	BB Before No	BB After No	b.40-59	White	No	3	6.42623	1	17.2131	1	17.2131	0	17.2131						Myeloablative	1	0	0	0	0	Acute Leukemia	119	20.45	117	20.78	3.8		-8
492	M	63	Unrelated	04/15/2015	08/17/2015	04/23/2016	04/23/2016	Dead	1		374	3	No			Yes	BB Any Yes	BB Before Yes	BB After Yes	c.>=60	White	No	3	4.06557	1	12.2623	1	12.2623	0	12.2623	05/05/2015	3	02/25/2016	2	Atenolol	Myeloablative	1	0	0	0	0	MDS/MPN	205	28.58	159	22.74	3.9		-7
493	F	39	Unrelated	05/07/2015	09/11/2015	02/13/2019		Followup	0		1378	0	No			Yes	BB Any Yes	BB Before Yes	BB After No	a.<=39	White	z.Unknown	0	4.16393	0	45.1803	0	45.1803	0	45.1803					Carvedilol	Myeloablative	0	0	1	0	0	Acute Leukemia	149	24.8	140	23.68	3.4	L	-10
494	M	50	Related	11/22/2016	02/20/2017	02/10/2020		Followup	0		1175	6	No			Unknown	BB Any No	BB Before No	BB After No	b.40-59	White	No	4	2.95082	0	38.5246	0	38.5246	0	38.5246	12/12/2016	4	05/21/2018	2		Myeloablative	1	0	0	0	0	Lymphoma	153	22.62	143	21.4	3	L	-8
495	M	74	Unrelated	10/27/2015	02/16/2016	05/10/2022		Followup	0		2387	4	No			Yes	BB Any Yes	BB Before Yes	BB After Yes	c.>=60	White	No	4	3.67213	0	78.2623	0	78.2623	0	78.2623					Metoprolol	Non-myeloablative	0	0	1	0	0	MDS/MPN	214	33.6	194	27.87	3.6		-12
496	M	25	Unrelated	03/25/2015	05/22/2015	04/18/2019		Followup	0		1485	2	No			Unknown	BB Any No	BB Before No	BB After No	a.<=39	White	z.Unknown	2	1.90164	0	48.6885	0	48.6885	0	48.6885	02/01/2016	2				Non-myeloablative	0	0	0	0	1	Other	174	23.99	177	25.46	4.4		-7
497	M	75	Unrelated	07/26/2016	09/22/2016	03/24/2023		Followup	0		2432	4	No			Yes	BB Any Yes	BB Before Yes	BB After Yes	c.>=60	White	No	4	1.90164	0	79.7377	0	79.7377	0	79.7377					Carvedilol	Myeloablative	1	0	0	0	0	Acute Leukemia	215	28.55	205	27.41
498	M	62	Unrelated	11/11/2015	03/10/2016	07/19/2018	07/19/2018	Dead	1	Infection	981	4	No			Yes	BB Any Yes	BB Before No	BB After Yes	c.>=60	White	No	4	3.93443	1	32.1639	1	32.1639	0	32.1639	12/01/2015	3	08/22/2016	2		Myeloablative	1	0	0	0	0	MDS/MPN	195	26.9	169	22.9	3.7		-9
499	M	67	Related	04/12/2018	07/19/2018	01/27/2020		Followup	0		655	4	No			Unknown	BB Any No	BB Before No	BB After No	c.>=60	White	No	4	3.21311	0	21.4754	0	21.4754	0	21.4754	06/21/2018	3	07/01/2019	2		Non-myeloablative	0	1	0	0	0	Other	189	26.13	173	25.34	4.5		-10
500	M	64	Related	12/10/2015	03/30/2016	03/30/2016	03/30/2016	Dead	1	Infection	111	1	No			Yes	BB Any No	BB Before No	BB After No	c.>=60	White	No	1	3.63934	1	3.63934	1	3.63934	0	3.63934	01/21/2016	2				Myeloablative	1	0	0	0	0	Lymphoma	220	29.86	200	27.14	3.3	L	-10
501	F	35	Related	03/23/2017	06/21/2017	12/11/2019		Followup	0		993	2	No			Unknown	BB Any Yes	BB Before Yes	BB After Yes	a.<=39	White	No	2	2.95082	0	32.5574	0	32.5574	0	32.5574	04/17/2017	2	05/10/2018	2	Metoprolol	Reduced Intensity	1	0	0	0	0	Acute Leukemia	225	37.42	215	35.14	3.7		-7
502	F	24	Related	05/27/2015	08/28/2015	10/01/2019		Followup	0		1588	4	No			Unknown	BB Any No	BB Before No	BB After No	a.<=39	z.Other/Unknown	No	4	3.04918	0	52.0656	0	52.0656	0	52.0656	10/17/2015	1				Myeloablative	0	0	1	0	0	Acute Leukemia	285	48.03	274	45.38	3.6		-6
503	M	61	Unrelated	07/01/2015	10/20/2015	10/28/2021		Followup	0		2311	8	No			Yes	BB Any Yes	BB Before No	BB After Yes	c.>=60	White	No	4	3.63934	0	75.7705	0	75.7705	0	75.7705	08/01/2015	1				Non-myeloablative	0	0	0	1	0	Other	219	27.53	218	27.17	3.3	L	-9
504	M	44	Unrelated	06/24/2015	09/28/2015	09/30/2018	09/30/2018	Dead	1	Recurrent or Persistent Disease	1194	5	No			Unknown	BB Any No	BB Before No	BB After No	b.40-59	White	No	4	3.14754	1	39.1475	1	39.1475	0	39.1475						Myeloablative	1	0	0	0	0	Acute Leukemia	223	31.44	211	29.97	4.1		-13
505	M	21	Unrelated	03/10/2016	05/09/2016	01/08/2019		Followup	0		1034	0	No			Unknown	BB Any No	BB Before No	BB After No	a.<=39	White	z.Unknown	0	1.96721	0	33.9016	0	33.9016	0	33.9016	04/06/2016	1				Myeloablative	0	1	0	0	0	Other	179	26.39	169	24.62	4.2		-10
506	M	53	Unrelated	07/03/2015	09/04/2015	05/15/2019	05/15/2019	Dead	1	Infection	1412	6	No			Unknown	BB Any No	BB Before No	BB After No	b.40-59	White	No	4	2.06557	1	46.2951	1	46.2951	0	46.2951			06/19/2016	2		Myeloablative	1	0	0	0	0	Acute Leukemia	177	25.66	163	24.38	3.9		-9
507	M	39	Related	01/20/2016	03/30/2016	04/20/2016	04/20/2016	Dead	1	Recurrent or Persistent Disease	91	2	No			Unknown	BB Any No	BB Before No	BB After No	a.<=39	White	No	2	2.29508	1	2.98361	1	2.98361	0	2.98361						Myeloablative	1	0	0	0	0	MDS/MPN	207	28.72			3.6		-9
508	M	71	Related	01/13/2016	05/29/2016	05/29/2016	05/29/2016	Dead	1	Infection	137	2	No			Yes	BB Any Yes	BB Before Yes	BB After Yes	c.>=60	White	No	2	4.4918	1	4.4918	1	4.4918	0	4.4918					Metoprolol	Non-myeloablative	0	1	0	0	0	MDS/MPN	205	28.83	184	25.95	4.1		-9
509	M	60	Unrelated	07/29/2015	10/23/2015	04/27/2017	04/27/2017	Dead	1	Recurrent or Persistent Disease	638	3	No			No	BB Any No	BB Before No	BB After No	c.>=60	White	No	3	2.81967	1	20.918	1	20.918	0	20.918	08/24/2015	2	03/02/2016	2		Myeloablative	1	0	0	0	0	Acute Leukemia	169	23.41	164	23.91	3.6		-7
510	M	26	Unrelated	10/14/2015	01/11/2016	07/06/2018		Followup	0		996	3	No			Unknown	BB Any No	BB Before No	BB After No	a.<=39	White	No	3	2.91803	0	32.6557	0	32.6557	0	32.6557	11/13/2015	1				Non-myeloablative	0	0	0	0	1	Other	154	22.03	162	23.1	4.3		-6
511	F	69	Related	03/18/2016	04/09/2016	04/09/2016	04/09/2016	Dead	1	Infection	22	3	No			Unknown	BB Any No	BB Before No	BB After No	c.>=60	White	z.Unknown	3	0.721311	1	0.721311	1	0.721311	0	0.721311						Non-myeloablative	0	1	0	0	0	MDS/MPN	174	34.11			4.1		-10
512	M	56	Related	07/22/2015	10/21/2015	10/14/2019		Followup	0		1545	2	No			Unknown	BB Any No	BB Before No	BB After No	b.40-59	White	No	2	2.98361	0	50.6557	0	50.6557	0	50.6557						Myeloablative	1	0	0	0	0	Acute Leukemia	198	26.07	189	25.9	3.8		-9
513	F	62	Unrelated	07/14/2016	10/07/2016	07/03/2019		Followup	0		1084	3	No			Unknown	BB Any Yes	BB Before No	BB After Yes	c.>=60	Black	No	3	2.78689	0	35.541	0	35.541	0	35.541	08/22/2016	2	05/04/2017	1		Non-myeloablative	1	0	0	0	0	Acute Leukemia	149	26.33	137	24.26	3.8		-14
514	M	64	Related	11/11/2015	03/03/2016	07/01/2016	07/01/2016	Dead	1	Recurrent or Persistent Disease	233	3	Yes	25APR2016	166	Unknown	BB Any No	BB Before No	BB After No	c.>=60	White	No	3	3.70492	1	7.63934	0	5.44262	1	5.44262	03/28/2016	1				Non-myeloablative	0	1	0	0	0	MDS/MPN	177	25.86	173	24.95	3.7		-9
515	F	44	Related	09/01/2015	12/07/2015	08/29/2018		Followup	0		1093	2	No			Unknown	BB Any No	BB Before No	BB After No	b.40-59	White	No	2	3.18033	0	35.8361	0	35.8361	0	35.8361						Myeloablative	0	1	0	0	0	Lymphoma	133	20.16	125	18.94	4.2		-7
516	F	44	Unrelated	08/11/2015	11/13/2015	07/26/2019		Followup	0		1445	3	No			Unknown	BB Any No	BB Before No	BB After No	b.40-59	White	No	3	3.08197	0	47.377	0	47.377	0	47.377	09/10/2015	2	06/05/2017	2		Myeloablative	1	0	0	0	0	Acute Leukemia	199	33.57	175	29.48	4.3		-8
517	M	56	Unrelated	11/25/2015	04/08/2016	03/09/2022		Followup	0		2296	4	No			Yes	BB Any Yes	BB Before Yes	BB After Yes	b.40-59	White	z.Unknown	4	4.42623	0	75.2787	0	75.2787	0	75.2787			04/18/2017	2	Metoprolol	Myeloablative	1	0	0	0	0	Acute Leukemia	191	25.86	181	24.73	4.3		-9
518	M	48	Unrelated	07/06/2016	10/07/2016	04/17/2017	04/17/2017	Dead	1	Organ Failure	285	5	No			Yes	BB Any No	BB Before No	BB After No	b.40-59	Black	No	4	3.04918	1	9.34426	1	9.34426	0	9.34426	11/12/2016	3	01/27/2017	2		Myeloablative	0	0	1	0	0	Acute Leukemia	187	29.38	150	24.19	3.7		-9
519	M	66	Unrelated	08/07/2015	11/09/2015	10/06/2016	10/06/2016	Dead	1	Recurrent or Persistent Disease	426	6	No			Yes	BB Any Yes	BB Before No	BB After Yes	c.>=60	White	No	4	3.08197	1	13.9672	1	13.9672	0	13.9672	09/15/2015	3	01/19/2016	1		Reduced Intensity	0	0	1	0	0	Acute Leukemia	181	25.03	174	24.38	3.2	L	-8
520	F	37	Unrelated	07/28/2015	10/23/2015	07/15/2019		Followup	0		1448	2	No			Yes	BB Any No	BB Before No	BB After No	a.<=39	White	No	2	2.85246	0	47.4754	0	47.4754	0	47.4754	08/21/2015	3	05/03/2016	2		Myeloablative	1	0	0	0	0	Acute Leukemia	128	20.27	123	19.81	3.6		-8
521	M	71	Unrelated	08/16/2017	08/31/2017	08/31/2017	08/31/2017	Dead	1	Organ Failure	15	4	No			No	BB Any Yes	BB Before Yes	BB After No	c.>=60	White	No	4	0.491803	1	0.491803	1	0.491803	0	0.491803					Carvedilol	Myeloablative	1	0	0	0	0	MDS/MPN	220	29.13			4.5		-9
522	M	65	Related	01/12/2016	04/11/2016	04/08/2019		Followup	0		1182	2	No			No	BB Any No	BB Before No	BB After No	c.>=60	White	z.Unknown	2	2.95082	0	38.7541	0	38.7541	0	38.7541	02/17/2016	2	11/21/2016	1		Myeloablative	1	0	0	0	0	MDS/MPN	164	25.41	161	24.96	4.2		-13
523	M	61	Related	09/01/2015	11/30/2015	09/10/2016	09/10/2016	Dead	1	Recurrent or Persistent Disease	375	6	No			No	BB Any Yes	BB Before Yes	BB After No	c.>=60	White	No	4	2.95082	1	12.2951	1	12.2951	0	12.2951	09/22/2015	1			Carvedilol	Myeloablative	1	0	0	0	0	Acute Leukemia	146	22.71	138	21.88	3.8		-11
524	F	61	Related	08/26/2015	11/23/2015	06/12/2017	06/12/2017	Dead	1	Recurrent or Persistent Disease	656	3	No			Unknown	BB Any No	BB Before No	BB After No	c.>=60	White	No	3	2.91803	1	21.5082	1	21.5082	0	21.5082	09/22/2015	2				Myeloablative	1	0	0	0	0	MDS/MPN	120	18.82	116	17.64	3.9		-7
525	F	61	Related	11/30/2015	03/08/2016	01/17/2019		Followup	0		1144	2	No			No	BB Any Yes	BB Before Yes	BB After Yes	c.>=60	White	z.Unknown	2	3.2459	0	37.5082	0	37.5082	0	37.5082	05/16/2016	2	08/30/2016	1	Carvedilol	Myeloablative	1	0	0	0	0	Acute Leukemia	135	24.02	134	24.59	3.7		-5
526	M	61	Unrelated	06/06/2019	09/10/2019	10/16/2019	10/16/2019	Dead	1	Recurrent or Persistent Disease	132	1	No			Unknown	BB Any No	BB Before No	BB After No	c.>=60	White	z.Unknown	1	3.14754	1	4.32787	1	4.32787	0	4.32787	06/17/2019	2				Myeloablative	1	0	0	0	0	Acute Leukemia	245	35.11			3.6		-8
527	F	45	Unrelated	09/30/2015	04/05/2016	06/05/2017	06/05/2017	Dead	1	Infection	614	4	No			No	BB Any Yes	BB Before No	BB After Yes	b.40-59	White	No	4	6.16393	1	20.1311	1	20.1311	0	20.1311	10/28/2015	2	06/01/2016	2		Myeloablative	0	0	1	0	0	Lymphoma	139	21.83	130	20.18	3.3	L	-9
528	M	68	Unrelated	10/23/2015	12/04/2015	12/06/2015	12/06/2015	Dead	1	Infection	44	3	No			No	BB Any No	BB Before No	BB After No	c.>=60	White	z.Unknown	3	1.37705	1	1.44262	1	1.44262	0	1.44262						Myeloablative	1	0	0	0	0	MDS/MPN	169	25.08			3.8		-9
529	F	45	Related	09/25/2015	11/17/2015	11/17/2015	11/17/2015	Dead	1		53	5	No			No	BB Any Yes	BB Before No	BB After Yes	b.40-59	White	No	4	1.7377	1	1.7377	1	1.7377	0	1.7377						Myeloablative	0	1	0	0	0	MDS/MPN	255	37.62			3.4	L	-8
530	M	40	Unrelated	09/30/2015	12/18/2015	10/01/2018		Followup	0		1097	4	No			Unknown	BB Any No	BB Before No	BB After No	b.40-59	White	Yes	4	2.59016	0	35.9672	0	35.9672	0	35.9672	10/20/2015	1				Myeloablative	1	0	0	0	0	Acute Leukemia	179	24.95	175	24.54	4.3		-8
531	F	52	Unrelated	10/09/2015	01/14/2016	10/23/2018		Followup	0		1110	2	No			No	BB Any No	BB Before No	BB After No	b.40-59	White	z.Unknown	2	3.18033	0	36.3934	0	36.3934	0	36.3934	12/31/2015	2				Myeloablative	1	0	0	0	0	Acute Leukemia	117	21.57	110	20.84	4.7		-11
532	M	64	Related	08/31/2017	11/21/2017	08/19/2019		Followup	0		718	3	No			Unknown	BB Any No	BB Before No	BB After No	c.>=60	White	No	3	2.68852	0	23.541	0	23.541	0	23.541						Non-myeloablative	0	1	0	0	0	Lymphoma	191	31.74	183	30.56	4.3		-7
533	M	54	Unrelated	11/18/2015	02/22/2016	11/05/2018		Followup	0		1083	3	No			Unknown	BB Any No	BB Before No	BB After No	b.40-59	White	No	3	3.14754	0	35.5082	0	35.5082	0	35.5082			07/25/2016	2		Myeloablative	1	0	0	0	0	MDS/MPN	155	23.77	150	22.95	3.9		-9
534	M	45	Unrelated	04/07/2016	07/05/2016	10/11/2018		Followup	0		917	2	No			Unknown	BB Any No	BB Before No	BB After No	b.40-59	White	No	2	2.91803	0	30.0656	0	30.0656	0	30.0656			05/15/2017	1		Myeloablative	1	0	0	0	0	MDS/MPN	209	31.67	181	27.88	4.3		-10
535	M	23	Unrelated	11/03/2015	01/28/2016	08/16/2019		Followup	0		1382	2	No			Unknown	BB Any No	BB Before No	BB After No	a.<=39	White	No	2	2.81967	0	45.3115	0	45.3115	0	45.3115	11/25/2015	2	02/08/2017	2		Myeloablative	1	0	0	0	0	Lymphoma	185	25.5	175	25.12	4.2		-8
536	M	35	Related	10/09/2015	10/15/2015	10/15/2015	10/15/2015	Dead	1	Organ Failure	6	6	No			Unknown	BB Any No	BB Before No	BB After No	a.<=39	White	No	4	0.196721	1	0.196721	1	0.196721	0	0.196721						Non-myeloablative	0	0	0	0	1	Other	152	22.26			2.2	L	-9
537	F	69	Related	04/18/2017	07/12/2017	05/13/2019		Followup	0		755	2	No			Yes	BB Any Yes	BB Before Yes	BB After Yes	c.>=60	White	No	2	2.78689	0	24.7541	0	24.7541	0	24.7541					Carvedilol	Myeloablative	0	0	0	0	1	Acute Leukemia	148	27.13	140	24.84	4		-8
538	F	62	Unrelated	03/15/2017	06/15/2017	03/20/2019		Followup	0		735	2	No			No	BB Any No	BB Before No	BB After No	c.>=60	White	No	2	3.01639	0	24.0984	0	24.0984	0	24.0984			02/15/2018	1		Myeloablative	1	0	0	0	0	MDS/MPN	106	18.16	97	16.64	4.1		-14
539	F	50	Unrelated	11/20/2015	02/22/2016	06/04/2018		Followup	0		927	6	No			No	BB Any No	BB Before No	BB After No	b.40-59	White	No	4	3.08197	0	30.3934	0	30.3934	0	30.3934	12/15/2015	1				Myeloablative	1	0	0	0	0	Acute Leukemia	125	21.57	125	21.6	3.8		-11
540	M	65	Related	04/19/2016	07/19/2016	12/05/2017	12/05/2017	Dead	1	Organ Failure	595	9	No			No	BB Any Yes	BB Before Yes	BB After No	c.>=60	White	No	4	2.98361	1	19.5082	1	19.5082	0	19.5082			11/15/2017	2	Metoprolol	Myeloablative	1	0	0	0	0	MDS/MPN	245	32.38	220	30.86	3.8		-8
541	M	62	Unrelated	01/27/2016	05/12/2016	12/02/2016	12/02/2016	Dead	1	Infection	310	3	No			Yes	BB Any No	BB Before No	BB After No	c.>=60	White	No	3	3.47541	1	10.1639	1	10.1639	0	10.1639			08/26/2016	1		Myeloablative	1	0	0	0	0	MDS/MPN	222	29.61	204	26.77	4.1		-7
542	M	24	Related	01/26/2016	03/25/2016	04/25/2019		Followup	0		1185	3	No			Unknown	BB Any No	BB Before No	BB After No	a.<=39	White	z.Unknown	3	1.93443	0	38.8525	0	38.8525	0	38.8525	04/16/2016	2				Non-myeloablative	0	0	0	1	0	Lymphoma	131	20.62	121	19.69	4.1		-14
543	M	40	Unrelated	07/26/2016	10/13/2016	09/18/2019		Followup	0		1149	5	No			Yes	BB Any Yes	BB Before No	BB After Yes	b.40-59	White	No	4	2.59016	0	37.6721	0	37.6721	0	37.6721						Non-myeloablative	0	0	0	1	0	Other	280	35.05	274	35.14	3.7		-12
544	F	56	Unrelated	01/27/2016	04/28/2016	01/30/2019		Followup	0		1099	3	No			Yes	BB Any Yes	BB Before Yes	BB After Yes	b.40-59	Black	No	3	3.01639	0	36.0328	0	36.0328	0	36.0328			10/06/2016	2	Carvedilol	Myeloablative	1	0	0	0	0	Acute Leukemia	119	20.79	105	18.67	4		-13
545	M	59	Unrelated	03/07/2016	06/23/2016	03/28/2017	03/28/2017	Dead	1	Infection	386	5	No			Unknown	BB Any No	BB Before No	BB After No	b.40-59	Black	No	4	3.54098	1	12.6557	1	12.6557	0	12.6557			08/09/2016	2		Myeloablative	0	0	1	0	0	Lymphoma	177	28.93	149	23.97	3.9		-11
546	F	56	Unrelated	01/13/2016	04/29/2016	09/14/2016	09/14/2016	Dead	1	GVHD	245	4	No			Yes	BB Any No	BB Before No	BB After No	b.40-59	White	No	4	3.5082	1	8.03279	1	8.03279	0	8.03279	02/11/2016	3	09/07/2016	2		Myeloablative	0	0	1	0	0	Acute Leukemia	266	43.78	232	38.14	3.2	L	-11
547	M	64	Related	05/03/2016	07/27/2016	04/25/2018		Followup	0		722	2	No			Unknown	BB Any No	BB Before No	BB After No	c.>=60	White	No	2	2.78689	0	23.6721	0	23.6721	0	23.6721						Myeloablative	1	0	0	0	0	MDS/MPN	175	30.03	163	27.18	4		-6
548	M	69	Unrelated	01/27/2016	04/22/2016	12/04/2016	12/04/2016	Dead	1	Other/Unknown	312	5	No			Yes	BB Any Yes	BB Before No	BB After Yes	c.>=60	White	No	4	2.81967	1	10.2295	1	10.2295	0	10.2295	02/19/2016	1				Myeloablative	1	0	0	0	0	Acute Leukemia	185	25.81	163	23.41	3.6		-6
549	M	42	Related	09/28/2016	12/30/2016	09/23/2019		Followup	0		1090	2	No			Unknown	BB Any No	BB Before No	BB After No	b.40-59	White	z.Unknown	2	3.04918	0	35.7377	0	35.7377	0	35.7377	10/10/2016	2				Myeloablative	1	0	0	0	0	Lymphoma	184	28.85	164	25.61	4.1		-9
550	M	35	Related	03/27/2018	09/11/2018	02/03/2020		Followup	0		678	2	No			Unknown	BB Any No	BB Before No	BB After No	a.<=39	White	No	2	5.5082	0	22.2295	0	22.2295	0	22.2295						Non-myeloablative	0	0	1	0	0	Other	133	20.78	108	16.83	3.7		-8
551	F	64	Unrelated	03/29/2016	06/23/2016	12/22/2016	12/22/2016	Dead	1	Recurrent or Persistent Disease	268	8	Yes	28SEP2016	183	Yes	BB Any Yes	BB Before Yes	BB After Yes	c.>=60	Black	z.Unknown	4	2.81967	1	8.78689	0	6	1	6	04/13/2016	3	08/02/2016	2	Carvedilol	Myeloablative	1	0	0	0	0	MDS/MPN	258	36.02	207	28.92	3.7		-8
552	M	54	Related	03/30/2016	06/21/2016	03/07/2019	07/16/2020	Followup	0		1072	3	Yes	28AUG2017	516	Yes	BB Any Yes	BB Before Yes	BB After Yes	b.40-59	Black	No	3	2.72131	0	35.1475	0	16.918	1	16.918			10/04/2016	2	Metoprolol	Myeloablative	0	1	0	0	0	Acute Leukemia	178	22.89	153	19.61	3.4	L	-8
553	F	29	Related	12/08/2015	03/21/2016	07/07/2016	07/07/2016	Dead	1	Recurrent or Persistent Disease	212	4	No			Yes	BB Any Yes	BB Before Yes	BB After Yes	a.<=39	White	z.Unknown	4	3.40984	1	6.95082	1	6.95082	0	6.95082					Propranolol	Myeloablative	1	0	0	0	0	Acute Leukemia	140	21.5	134	20.74	2.5	L	-11
554	M	38	Unrelated	05/04/2016	09/16/2016	05/28/2019		Followup	0		1119	2	No			Yes	BB Any Yes	BB Before No	BB After Yes	a.<=39	White	No	2	4.42623	0	36.6885	0	36.6885	0	36.6885						Myeloablative	0	0	1	0	0	Acute Leukemia	202	31.55	162	26.08	3.5		-9
555	M	62	Unrelated	04/27/2016	08/16/2016	10/20/2016	10/20/2016	Dead	1	Recurrent or Persistent Disease	176	1	Yes	05AUG2016	100	Yes	BB Any Yes	BB Before No	BB After Yes	c.>=60	White	No	1	3.63934	1	5.77049	0	3.27869	1	3.27869	05/09/2016	2				Myeloablative	0	0	1	0	0	MDS/MPN	262	37.14	224	31.19	3.5		-11
556	F	57	Unrelated	05/13/2016	08/12/2016	03/01/2019		Followup	0		1022	0	No			Unknown	BB Any No	BB Before No	BB After No	b.40-59	White	No	0	2.98361	0	33.5082	0	33.5082	0	33.5082	06/17/2016	1				Myeloablative	1	0	0	0	0	Acute Leukemia	142	26.59	136	24.76	3.7		-11
557	M	37	Related	08/11/2016	11/17/2016	01/26/2017	01/26/2017	Dead	1	Recurrent or Persistent Disease	168	5	Yes	03DEC2016	114	Yes	BB Any Yes	BB Before No	BB After Yes	a.<=39	Black	No	4	3.21311	1	5.5082	0	3.7377	1	3.7377						Myeloablative	0	1	0	0	0	Acute Leukemia	304	37.41	292	35.57	3.4	L	-10
558	M	51	Related	04/11/2018	06/26/2018	02/22/2019		Followup	0		317	2	No			Yes	BB Any No	BB Before No	BB After No	b.40-59	White	z.Unknown	2	2.4918	0	10.3934	0	10.3934	0	10.3934						Myeloablative	0	1	0	0	0	MDS/MPN	172	26.46	159	24.84	4.2		-8
559	M	57	Unrelated	02/27/2020	04/01/2020	03/16/2020		Followup	0		18	5	No			No	BB Any No	BB Before No	BB After No	b.40-59	White	No	4	1.11475	0	0.590164	0	0.590164	0	0.590164	03/29/2020	2	09/24/2020	2		Myeloablative	1	0	0	0	0	MDS/MPN	188	29.41	166	26.12	4.1		-8
560	M	29	Unrelated	04/19/2016	07/28/2016	01/24/2018		Followup	0		645	7	No			Yes	BB Any Yes	BB Before No	BB After Yes	a.<=39	White	No	4	3.27869	0	21.1475	0	21.1475	0	21.1475			01/11/2017	2		Myeloablative	1	0	0	0	0	Acute Leukemia	251	33.31	213	27.98	4.2		-10
561	M	52	Related	03/10/2016	05/17/2016	03/05/2020		Followup	0		1456	3	No			Yes	BB Any No	BB Before No	BB After No	b.40-59	White	No	3	2.22951	0	47.7377	0	47.7377	0	47.7377	06/04/2016	2	02/14/2017	2		Myeloablative	0	0	0	0	1	Acute Leukemia	127	17.75	137	20.6	3.1	L	-10
562	M	59	Unrelated	05/11/2016	08/11/2016	04/15/2019	02/10/2023	Followup	0		1069	2	No			Yes	BB Any Yes	BB Before No	BB After Yes	b.40-59	White	No	2	3.01639	0	35.0492	0	35.0492	0	35.0492	10/26/2016	2	08/30/2016	1		Myeloablative	1	0	0	0	0	Acute Leukemia	197	29.06	203	29.6	4		-9
563	M	43	Unrelated	05/03/2016	08/10/2016	04/24/2019		Followup	0		1086	2	No			Unknown	BB Any No	BB Before No	BB After No	b.40-59	White	No	2	3.2459	0	35.6066	0	35.6066	0	35.6066	12/21/2016	1	12/21/2016	2		Myeloablative	1	0	0	0	0	Lymphoma	167	26.98	132	20.64	4.2		-10
564	M	48	Unrelated	04/27/2016	07/16/2016	07/16/2016	07/16/2016	Dead	1	Organ Failure	80	3	No			Yes	BB Any Yes	BB Before Yes	BB After Yes	b.40-59	Black	No	3	2.62295	1	2.62295	1	2.62295	0	2.62295					Carvedilol	Myeloablative	0	0	1	0	0	Acute Leukemia	200	27.32			3.4	L	-9
565	M	62	Unrelated	02/21/2018	06/08/2018	12/19/2018	12/19/2018	Dead	1	GVHD	301	3	No			Unknown	BB Any No	BB Before No	BB After No	c.>=60	White	No	3	3.5082	1	9.86885	1	9.86885	0	9.86885	03/20/2018	2	08/27/2018	2		Myeloablative	1	0	0	0	0	Lymphoma	185	25.3	162	21.89	3.9		-9
566	F	58	Related	10/10/2017	01/05/2018	10/04/2019		Followup	0		724	4	No			Yes	BB Any No	BB Before No	BB After No	b.40-59	White	No	4	2.85246	0	23.7377	0	23.7377	0	23.7377	10/19/2018	3	11/30/2018	2		Myeloablative	1	0	0	0	0	MDS/MPN	189	32.93	177	30.26	4		-8
567	F	54	Unrelated	07/21/2016	03/07/2017	02/07/2019		Followup	0		931	2	No			Yes	BB Any No	BB Before No	BB After No	b.40-59	White	z.Unknown	2	7.5082	0	30.5246	0	30.5246	0	30.5246	08/12/2016	2				Myeloablative	1	0	0	0	0	MDS/MPN	193	31.26	170	27.28	4		-8
568	M	26	Unrelated	05/05/2016	08/01/2016	08/30/2019		Followup	0		1212	3	No			Unknown	BB Any No	BB Before No	BB After No	a.<=39	White	z.Unknown	3	2.88525	0	39.7377	0	39.7377	0	39.7377	05/18/2016	1	09/29/2016	1		Myeloablative	1	0	0	0	0	Acute Leukemia	260	36.02	269	37.3	4.1		-10
569	M	53	Related	07/27/2016	11/02/2016	02/26/2019	02/26/2019	Dead	1	Infection	944	4	No			Yes	BB Any Yes	BB Before Yes	BB After Yes	b.40-59	z.Other/Unknown	No	4	3.21311	1	30.9508	1	30.9508	0	30.9508					Atenolol	Non-myeloablative	0	1	0	0	0	Chronic Leukemia	249	37.66	220	32.15	4		-8
570	M	59	Unrelated	09/09/2016	12/04/2016	09/19/2018		Followup	0		740	2	No			Unknown	BB Any No	BB Before No	BB After No	b.40-59	White	Yes	2	2.81967	0	24.2623	0	24.2623	0	24.2623	09/29/2016	2	11/06/2017	2		Myeloablative	1	0	0	0	0	Acute Leukemia	177	26.83	157	24.03	3.9		-9
571	M	45	Related	03/30/2016	07/14/2016	07/14/2016	07/14/2016	Dead	1	Infection	106	8	No			Yes	BB Any Yes	BB Before Yes	BB After Yes	b.40-59	White	No	4	3.47541	1	3.47541	1	3.47541	0	3.47541	04/20/2016	3			Metoprolol	Myeloablative	0	0	1	0	0	Acute Leukemia	260	35.27	295	38.73	3.1	L	-10
572	F	48	Unrelated	07/26/2016	11/02/2016	12/07/2017	12/07/2017	Dead	1	GVHD	499	5	No			Unknown	BB Any No	BB Before No	BB After No	b.40-59	White	No	4	3.2459	1	16.3607	1	16.3607	0	16.3607	09/01/2016	2	03/08/2017	2		Myeloablative	1	0	0	0	0	MDS/MPN	143	26.16	143	26.97	3	L	-10
573	M	64	Related	12/19/2018		03/01/2019	03/01/2019	Dead	1	Infection	72	3	No			Yes	BB Any No	BB Before No	BB After No	c.>=60	White	No	3		1	2.36066	1	2.36066	0	2.36066	12/29/2018	2				Myeloablative	0	0	0	0	1	Acute Leukemia	157	22.04	135	19.42	3.8		-7
574	M	46	Unrelated	06/14/2019	09/06/2019	09/26/2019		Followup	0		104	3	No			Unknown	BB Any No	BB Before No	BB After No	b.40-59	White	No	3	2.7541	0	3.40984	0	3.40984	0	3.40984	08/06/2019	1	01/31/2020	2		Myeloablative	1	0	0	0	0	MDS/MPN	224	30.43	205	31.11	3.7		-8
575	F	49	Related	07/12/2016	10/06/2016	07/03/2019		Followup	0		1086	2	No			Unknown	BB Any No	BB Before No	BB After No	b.40-59	White	No	2	2.81967	0	35.6066	0	35.6066	0	35.6066			05/31/2017	2		Myeloablative	1	0	0	0	0	Lymphoma	188	31.68	182	31.01	3.9		-5
576	F	66	Related	02/21/2017	04/30/2017	05/02/2017	05/02/2017	Dead	1	Organ Failure	70	3	No			No	BB Any No	BB Before No	BB After No	c.>=60	White	No	3	2.22951	1	2.29508	1	2.29508	0	2.29508	03/29/2017	3				Myeloablative	0	0	0	0	1	MDS/MPN	142	23.16			3.7		-8
577	F	50	Unrelated	04/08/2017	06/21/2017	04/18/2019		Followup	0		740	1	No			Unknown	BB Any No	BB Before No	BB After No	b.40-59	White	No	1	2.42623	0	24.2623	0	24.2623	0	24.2623			01/25/2018	2		Non-myeloablative	1	0	0	0	0	Lymphoma	171	31.6	158	29.27	4.2		-9
578	M	52	Unrelated	04/04/2017	07/02/2017	04/12/2019		Followup	0		738	2	No			Unknown	BB Any No	BB Before No	BB After No	b.40-59	White	No	2	2.91803	0	24.1967	0	24.1967	0	24.1967	05/10/2017	2				Myeloablative	1	0	0	0	0	Chronic Leukemia	216	31.97	179	25.45	3.8		-8
579	F	64	Unrelated	06/15/2016	08/01/2016	08/01/2016	08/01/2016	Dead	1	GVHD	47	1	No			Yes	BB Any Yes	BB Before No	BB After Yes	c.>=60	White	No	1	1.54098	1	1.54098	1	1.54098	0	1.54098	07/14/2016	4				Myeloablative	1	0	0	0	0	Acute Leukemia	166	27.7			3.8		-6
580	F	74	Unrelated	08/24/2016	11/16/2017	09/27/2017	09/27/2017	Dead	1	Organ Failure	399	3	No			Unknown	BB Any No	BB Before No	BB After No	c.>=60	White	z.Unknown	3	14.7213	1	13.082	1	13.082	0	13.082						Myeloablative	0	0	1	0	0	Acute Leukemia	136	21.42	118	18.55	4		-13
581	M	65	Unrelated	09/28/2016	12/24/2016	12/24/2016	12/24/2016	Dead	1	Recurrent or Persistent Disease	87	3	No			Unknown	BB Any No	BB Before No	BB After No	c.>=60	White	No	3	2.85246	1	2.85246	1	2.85246	0	2.85246						Myeloablative	0	0	1	0	0	Other	146	24.32	126	20.95	4.1		-10
582	M	39	Unrelated	09/22/2016	12/21/2016	07/16/2019		Followup	0		1027	4	No			Yes	BB Any Yes	BB Before Yes	BB After Yes	a.<=39	White	No	4	2.95082	0	33.6721	0	33.6721	0	33.6721			05/15/2018	1	Metoprolol	Myeloablative	1	0	0	0	0	Acute Leukemia	239	38.59	199	32.03	4		-9
583	F	60	Related	09/12/2018	01/04/2019	03/29/2020	03/29/2020	Dead	1	Recurrent or Persistent Disease	564	2	No			Unknown	BB Any No	BB Before No	BB After No	c.>=60	White	No	2	3.7377	1	18.4918	1	18.4918	0	18.4918						Reduced Intensity	0	1	0	0	0	Lymphoma	166	26.81	149	24.87	4.2		-8
584	M	52	Unrelated	06/22/2016	11/02/2016	09/30/2019		Followup	0		1195	3	No			Yes	BB Any Yes	BB Before No	BB After Yes	b.40-59	White	Yes	3	4.36066	0	39.1803	0	39.1803	0	39.1803						Myeloablative	1	0	0	0	0	Lymphoma	259	32.38	226	28.3	3	L	-9
585	F	28	Unrelated	09/14/2016	12/13/2017	09/24/2019		Followup	0		1105	1	No			Yes	BB Any No	BB Before No	BB After No	a.<=39	White	No	1	14.918	0	36.2295	0	36.2295	0	36.2295			06/02/2017	2		Myeloablative	1	0	0	0	0	Acute Leukemia	153	20.19	139	18.21	4		-8
586	M	31	Unrelated	11/09/2016	12/15/2016	12/15/2016	12/15/2016	Dead	1	Organ Failure	36	4	No			Yes	BB Any Yes	BB Before Yes	BB After Yes	a.<=39	White	No	4	1.18033	1	1.18033	1	1.18033	0	1.18033					Carvedilol	Myeloablative	1	0	0	0	0	Acute Leukemia	160	21.73			3.3	L	-9
587	M	25	Unrelated	09/21/2016	12/27/2016	08/18/2019	08/18/2019	Dead	1		1061	3	No			Unknown	BB Any No	BB Before No	BB After No	a.<=39	White	No	3	3.18033	1	34.7869	1	34.7869	0	34.7869			02/09/2017	1		Myeloablative	0	0	1	0	0	Acute Leukemia	182	24.69	155	20.96	3.4	L	-9
588	M	21	Related	08/30/2016	12/19/2016	08/05/2019		Followup	0		1070	4	No			Unknown	BB Any No	BB Before No	BB After No	a.<=39	White	No	4	3.63934	0	35.082	0	35.082	0	35.082	11/01/2016	2				Myeloablative	1	0	0	0	0	Lymphoma	211	34.1	206	33.97	3.4	L	-8
589	F	68	Related	04/05/2017	06/16/2017	02/26/2018	02/26/2018	Dead	1	Recurrent or Persistent Disease	327	2	Yes	24OCT2017	202	Unknown	BB Any No	BB Before No	BB After No	c.>=60	White	No	2	2.36066	1	10.7213	0	6.62295	1	6.62295						Non-myeloablative	0	0	1	0	0	MDS/MPN	118	22.3	111	20.92	4.1		-8
590	F	36	Related	08/23/2016	01/02/2017	02/07/2017	02/07/2017	Dead	1	Recurrent or Persistent Disease	168	0	No			Unknown	BB Any No	BB Before No	BB After No	a.<=39	White	No	0	4.32787	1	5.5082	1	5.5082	0	5.5082						Myeloablative	1	0	0	0	0	Lymphoma	163	26.11	155	24.01	4.2		-9
591	M	18	Related	01/18/2017	04/13/2017	01/10/2019		Followup	0		722	5	No			No	BB Any Yes	BB Before Yes	BB After No	a.<=39	White	No	4	2.78689	0	23.6721	0	23.6721	0	23.6721	04/27/2017	2			btype_other	Non-myeloablative	0	0	0	1	0	Lymphoma	164	23.06	140	19.49	4.3		-13
592	M	48	Unrelated	11/09/2017	01/31/2018	11/01/2019		Followup	0		722	1	No			Unknown	BB Any No	BB Before No	BB After No	b.40-59	White	No	1	2.72131	0	23.6721	0	23.6721	0	23.6721	03/28/2018	2				Non-myeloablative	1	0	0	0	0	Acute Leukemia	198	29.16	172	26.28	4.1		-7
593	M	24	Unrelated	09/02/2016	02/01/2017	01/08/2018		Followup	0		493	2	No			Unknown	BB Any No	BB Before No	BB After No	a.<=39	White	No	2	4.98361	0	16.1639	0	16.1639	0	16.1639						Non-myeloablative	0	0	0	0	1	Other	185	24.51	187	25.52	3.8		-10
594	M	22	Unrelated	10/06/2016	12/16/2016	11/14/2019		Followup	0		1134	1	No			No	BB Any No	BB Before No	BB After No	a.<=39	White	No	1	2.32787	0	37.1803	0	37.1803	0	37.1803						Myeloablative	1	0	0	0	0	Chronic Leukemia	186	25.65	188	25.52	4.8		-10
595	M	34	Unrelated	09/30/2016	12/25/2016	12/18/2018	12/18/2018	Dead	1	GVHD	809	7	No			Yes	BB Any No	BB Before No	BB After No	a.<=39	White	No	4	2.81967	1	26.5246	1	26.5246	0	26.5246	03/23/2017	1	12/04/2018	2		Myeloablative	1	0	0	0	0	Acute Leukemia	215	26.15	187	22.7	4		-9
596	F	51	Unrelated	12/14/2016	01/11/2017	01/11/2017	01/11/2017	Dead	1	Infection	28	10	No			Yes	BB Any No	BB Before No	BB After No	b.40-59	White	No	4	0.918033	1	0.918033	1	0.918033	0	0.918033						Myeloablative	1	0	0	0	0	Acute Leukemia	265	41.11			3.4	L	-9
597	M	62	Related	11/29/2016	01/09/2017	01/09/2017	01/09/2017	Dead	1	Infection	41	5	No			No	BB Any Yes	BB Before Yes	BB After Yes	c.>=60	White	No	4	1.34426	1	1.34426	1	1.34426	0	1.34426					Metoprolol	Non-myeloablative	0	1	0	0	0	Acute Leukemia	236	26.56			3.6		-10
598	M	64	Related	09/27/2016	12/29/2016	12/02/2019		Followup	0		1161	4	No			Unknown	BB Any No	BB Before No	BB After No	c.>=60	White	No	4	3.04918	0	38.0656	0	38.0656	0	38.0656						Myeloablative	1	0	0	0	0	Acute Leukemia	197	29.13	194	27.71	3.6		-8
599	F	53	Related	10/31/2016	01/24/2017	11/01/2019		Followup	0		1096	2	No			Unknown	BB Any No	BB Before No	BB After No	b.40-59	White	No	2	2.78689	0	35.9344	0	35.9344	0	35.9344	11/18/2016	1				Myeloablative	0	1	0	0	0	Acute Leukemia	139	22.39	118	19.18	4.5		-7
600	F	57	Related	11/09/2016	01/31/2017	11/07/2018		Followup	0		728	3	No			Unknown	BB Any No	BB Before No	BB After No	b.40-59	White	No	3	2.72131	0	23.8689	0	23.8689	0	23.8689	06/15/2017	2	10/08/2018	1		Myeloablative	1	0	0	0	0	Acute Leukemia	179	31.8	162	28.58	3.9		-9
601	M	21	Unrelated	12/07/2016	11/02/2017	11/02/2017	11/02/2017	Dead	1	Infection	330	3	No			Yes	BB Any Yes	BB Before No	BB After Yes	a.<=39	Black	No	3	10.8197	1	10.8197	1	10.8197	0	10.8197	01/03/2017	2	01/03/2017	2		Myeloablative	0	0	1	0	0	Lymphoma	184	25.71	181	25.91	4.3		-11
602	M	62	Unrelated	09/27/2017	12/20/2017	02/17/2019	02/17/2019	Dead	1	Recurrent or Persistent Disease	508	2	No			Unknown	BB Any No	BB Before No	BB After No	c.>=60	White	No	2	2.7541	1	16.6557	1	16.6557	0	16.6557	11/17/2017	2	05/25/2018	2		Myeloablative	0	0	1	0	0	MDS/MPN	209	28.4	204	29.06	3.5		-10
603	M	58	Unrelated	01/17/2018	04/13/2018	12/24/2018	12/24/2018	Dead	1	Infection	341	6	No			Unknown	BB Any No	BB Before No	BB After No	b.40-59	White	No	4	2.81967	1	11.1803	1	11.1803	0	11.1803	01/31/2018	2	09/14/2018	2		Myeloablative	1	0	0	0	0	MDS/MPN	208	31.4	179	28.07	4.3		-9
604	M	34	Related	01/27/2017	05/02/2017	04/06/2018	04/06/2018	Dead	1	Recurrent or Persistent Disease	434	4	No			Unknown	BB Any No	BB Before No	BB After No	a.<=39	White	No	4	3.11475	1	14.2295	1	14.2295	0	14.2295						Myeloablative	0	0	0	0	1	Acute Leukemia	231	28.98	197	24.63	3.4	L	-9
605	M	49	Related	01/18/2017	04/18/2017	03/21/2019		Followup	0		792	3	No			Yes	BB Any Yes	BB Before No	BB After Yes	b.40-59	Black	No	3	2.95082	0	25.9672	0	25.9672	0	25.9672			10/26/2017	2		Myeloablative	1	0	0	0	0	Acute Leukemia	209	28.65	202	27.53	3.6		-8
606	F	58	Unrelated	12/16/2016	03/21/2017	12/05/2018	06/28/2021	Followup	0		719	2	No			Yes	BB Any Yes	BB Before No	BB After Yes	b.40-59	White	No	2	3.11475	0	23.5738	0	23.5738	0	23.5738						Non-myeloablative	0	1	0	0	0	Other	134	20.16	129	20.26	3.6		-7
607	M	54	Unrelated	09/27/2018	12/06/2018	10/02/2019		Followup	0		370	2	No			Unknown	BB Any No	BB Before No	BB After No	b.40-59	White	No	2	2.29508	0	12.1311	0	12.1311	0	12.1311	07/18/2019	1	09/23/2020	2		Non-myeloablative	1	0	0	0	0	Acute Leukemia	223	36.21	207	30.59	4.1		-8
608	M	63	Related	05/18/2017	07/20/2017	10/30/2018	10/30/2018	Dead	1	GVHD	530	3	No			Yes	BB Any No	BB Before No	BB After No	c.>=60	White	No	3	2.06557	1	17.377	1	17.377	0	17.377	11/28/2017	1	12/15/2017	2		Myeloablative	1	0	0	0	0	MDS/MPN	205	30.19	200	30.69	4.4		-7
609	F	67	Unrelated	07/26/2017	10/26/2017	03/20/2018	03/20/2018	Dead	1	Organ Failure	237	3	No			Unknown	BB Any No	BB Before No	BB After No	c.>=60	White	No	3	3.01639	1	7.77049	1	7.77049	0	7.77049	09/05/2017	2	03/01/2018	2		Myeloablative	1	0	0	0	0	Acute Leukemia	153	27.28	135	25.11	3.7		-8
610	F	53	Unrelated	04/21/2017	09/01/2017	06/28/2019		Followup	0		798	4	No			Yes	BB Any Yes	BB Before Yes	BB After Yes	b.40-59	White	No	4	4.36066	0	26.1639	0	26.1639	0	26.1639	10/09/2017	2			Atenolol	Non-myeloablative	0	0	0	1	0	Acute Leukemia	268	44.36	261	43.23	3.9		-11
611	M	52	Unrelated	05/03/2017	08/02/2017	12/13/2017	12/13/2017	Dead	1	Recurrent or Persistent Disease	224	3	No			Yes	BB Any No	BB Before No	BB After No	b.40-59	Black	No	3	2.98361	1	7.34426	1	7.34426	0	7.34426						Myeloablative	0	0	1	0	0	Acute Leukemia	215	28.52	194	27.28	3.5		-10
612	M	68	Unrelated	08/18/2017	11/09/2017	12/06/2019	12/06/2019	Dead	1	GVHD	840	1	No			Unknown	BB Any No	BB Before No	BB After No	c.>=60	White	No	1	2.72131	1	27.541	1	27.541	0	27.541	09/14/2017	1	08/13/2018	2		Myeloablative	1	0	0	0	0	Acute Leukemia	202	27.9	173	24.39	3.9		-11
613	F	61	Related	03/01/2017	05/11/2017	10/25/2017	10/25/2017	Dead	1	Recurrent or Persistent Disease	238	1	Yes	15JUN2017	106	Unknown	BB Any No	BB Before No	BB After No	c.>=60	White	No	1	2.32787	1	7.80328	0	3.47541	1	3.47541						Non-myeloablative	0	0	0	0	1	Lymphoma	161	23.47	152	22.56	4.3		-8
614	M	19	Unrelated	02/22/2017	05/26/2017	05/09/2019		Followup	0		806	3	No			Yes	BB Any No	BB Before No	BB After No	a.<=39	Black	No	3	3.04918	0	26.4262	0	26.4262	0	26.4262	04/13/2017	2				Myeloablative	0	0	0	0	1	Lymphoma	209	31.13	201	29.64	4.2		-9
615	M	47	Related	02/14/2017	05/10/2017	02/01/2019		Followup	0		717	3	No			Unknown	BB Any No	BB Before No	BB After No	b.40-59	White	No	3	2.78689	0	23.5082	0	23.5082	0	23.5082						Myeloablative	1	0	0	0	0	Other	208	31.91	185	28.13	3.6		-8
616	M	68	Unrelated	11/06/2018	01/29/2019	05/14/2019		Followup	0		189	5	No			Yes	BB Any No	BB Before No	BB After No	c.>=60	White	No	4	2.7541	0	6.19672	0	6.19672	0	6.19672	11/27/2018	2	12/30/2020	1		Reduced Intensity	1	0	0	0	0	Acute Leukemia	198	29.97	197	30.43	3.9		-7
617	M	30	Related	12/14/2017	03/05/2018	03/09/2019	03/09/2019	Dead	1		450	4	No			Unknown	BB Any No	BB Before No	BB After No	a.<=39	White	No	4	2.65574	1	14.7541	1	14.7541	0	14.7541	01/03/2018	2				Reduced Intensity	0	1	0	0	0	Lymphoma	235	33.69	234	33.59	4		-14
618	F	56	Unrelated	07/13/2017	10/19/2017	08/19/2019		Followup	0		767	1	No			Unknown	BB Any No	BB Before No	BB After No	b.40-59	White	No	1	3.21311	0	25.1475	0	25.1475	0	25.1475	08/11/2017	1				Myeloablative	1	0	0	0	0	MDS/MPN	143	23.37	125	20.37	3.9		-8
619	M	72	Unrelated	06/02/2017	08/18/2017	09/27/2017	09/27/2017	Dead	1	Recurrent or Persistent Disease	117	4	Yes	10AUG2017	69	Yes	BB Any No	BB Before No	BB After No	c.>=60	White	No	4	2.52459	1	3.83607	0	2.2623	1	2.2623	07/14/2017	1				Non-myeloablative	0	0	1	0	0	Acute Leukemia	202	28.15	196	28.67	4.4		-11
620	M	63	Unrelated	05/16/2017	09/14/2017	09/16/2019	09/16/2019	Dead	1	Recurrent or Persistent Disease	853	4	No			Unknown	BB Any Yes	BB Before No	BB After Yes	c.>=60	White	No	4	3.96721	1	27.9672	1	27.9672	0	27.9672			03/27/2018	1		Myeloablative	1	0	0	0	0	MDS/MPN	180	25.1	144	20.96	4.1		-7
621	F	63	Unrelated	07/25/2017	11/03/2017	07/17/2019	07/17/2019	Dead	1	Recurrent or Persistent Disease	722	3	No			Yes	BB Any Yes	BB Before Yes	BB After Yes	c.>=60	Black	No	3	3.31148	1	23.6721	1	23.6721	0	23.6721					Carvedilol	Myeloablative	1	0	0	0	0	Acute Leukemia	189	32.58	162	28.25	3.7		-11
622	F	26	Related	03/28/2017	07/06/2017	02/05/2019	02/05/2019	Dead	1	GVHD	679	0	No			Unknown	BB Any No	BB Before No	BB After No	a.<=39	Black	Yes	0	3.27869	1	22.2623	1	22.2623	0	22.2623	06/26/2017	2	01/26/2018	2		Myeloablative	1	0	0	0	0	Acute Leukemia	151	24.7	129	21.39	3.6		-8
623	M	51	Unrelated	09/26/2017	12/15/2017	01/28/2018	01/28/2018	Dead	1	Recurrent or Persistent Disease	124	3	Yes	12JAN2018	108	Unknown	BB Any No	BB Before No	BB After No	b.40-59	White	No	3	2.62295	1	4.06557	0	3.54098	1	3.54098	10/30/2017	1				Myeloablative	1	0	0	0	0	Acute Leukemia	184	29.76	164	26.52	3.4	L	-12
624	M	35	Unrelated	05/10/2017	09/14/2017	10/28/2017	10/28/2017	Dead	1	Infection	171	3	No			Unknown	BB Any No	BB Before No	BB After No	a.<=39	White	No	3	4.16393	1	5.60656	1	5.60656	0	5.60656	06/14/2017	2				Myeloablative	0	0	0	0	1	Acute Leukemia	215	30.77			1.9	L	-11
625	M	34	Unrelated	09/13/2017	11/21/2017	09/19/2019		Followup	0		736	3	No			No	BB Any Yes	BB Before No	BB After Yes	a.<=39	White	No	3	2.2623	0	24.1311	0	24.1311	0	24.1311	10/02/2017	2	05/28/2018	2		Reduced Intensity	1	0	0	0	0	Lymphoma	202	29.88	180	27.43	4		-7
626	M	61	Unrelated	05/23/2017	08/18/2017	01/16/2018	01/16/2018	Dead	1	Infection	238	2	No			No	BB Any No	BB Before No	BB After No	c.>=60	White	No	2	2.85246	1	7.80328	1	7.80328	0	7.80328	11/20/2017	1	12/04/2017	2		Myeloablative	1	0	0	0	0	Acute Leukemia	217	31.17	184	27.42	3.4	L	-9
627	M	52	Unrelated	08/22/2018	11/23/2018	07/18/2019		Followup	0		330	3	No			Yes	BB Any No	BB Before No	BB After No	b.40-59	Black	No	3	3.04918	0	10.8197	0	10.8197	0	10.8197	09/07/2018	3	02/08/2019	2		Myeloablative	0	0	1	0	0	Acute Leukemia	191	26.73	158	22.28	4.2		-10
628	M	57	Related	09/21/2018	01/03/2019	09/26/2019		Followup	0		370	2	No			Unknown	BB Any No	BB Before No	BB After No	b.40-59	Black	No	2	3.40984	0	12.1311	0	12.1311	0	12.1311			05/03/2019	2		Myeloablative	1	0	0	0	0	Acute Leukemia	208	28.19	187	25.05	3.8		-11
629	F	56	Unrelated	08/23/2017	12/19/2017	12/19/2017	12/19/2017	Dead	1	Recurrent or Persistent Disease	118	3	Yes	13DEC2017	112	Yes	BB Any Yes	BB Before Yes	BB After Yes	b.40-59	White	No	3	3.86885	1	3.86885	0	3.67213	1	3.67213	09/14/2017	2			Metoprolol	Myeloablative	1	0	0	0	0	Acute Leukemia	188	28.57	174	26.48	4.1		-9
630	M	26	Related	03/21/2018	06/21/2018	04/04/2019		Followup	0		379	3	No			Unknown	BB Any No	BB Before No	BB After No	a.<=39	White	No	3	3.01639	0	12.4262	0	12.4262	0	12.4262	09/06/2018	1	10/04/2018	2		Myeloablative	1	0	0	0	0	MDS/MPN	157	23.02	144	21.48	3.6		-8
631	M	65	Unrelated	07/12/2017	09/30/2017	06/16/2019	06/16/2019	Dead	1	Infection	704	2	No			Unknown	BB Any No	BB Before No	BB After No	c.>=60	White	No	2	2.62295	1	23.082	1	23.082	0	23.082			02/19/2019	2		Myeloablative	1	0	0	0	0	Acute Leukemia	205	30.3	205	31.55	3.7		-7
632	F	41	Related	06/07/2017	08/31/2017	05/19/2018	05/19/2018	Dead	1	Recurrent or Persistent Disease	346	2	Yes	24JAN2018	231	No	BB Any Yes	BB Before No	BB After Yes	b.40-59	White	No	2	2.78689	1	11.3443	0	7.57377	1	7.57377						Myeloablative	1	0	0	0	0	Acute Leukemia	113	19.83	119	20.76	3.7		-9
633	M	58	Related	07/18/2017	11/16/2017	09/19/2018	09/19/2018	Dead	1	Recurrent or Persistent Disease	428	7	No			No	BB Any Yes	BB Before Yes	BB After No	b.40-59	White	No	4	3.96721	1	14.0328	1	14.0328	0	14.0328	08/06/2017	2	08/19/2018	2	Metoprolol	Myeloablative	1	0	0	0	0	Acute Leukemia	164	25.81	158	24.55	3.2	L	-8
634	M	48	Related	12/20/2017	04/27/2018	01/14/2020		Followup	0		755	4	No			Yes	BB Any No	BB Before No	BB After No	b.40-59	White	No	4	4.19672	0	24.7541	0	24.7541	0	24.7541	01/29/2018	2	08/23/2018	1		Myeloablative	0	1	0	0	0	MDS/MPN	190	28.05	172	23.96	3.7		-10
635	F	58	Related	11/22/2017	02/19/2018	11/08/2018		Followup	0		351	2	No			Unknown	BB Any No	BB Before No	BB After No	b.40-59	White	No	2	2.91803	0	11.5082	0	11.5082	0	11.5082						Myeloablative	0	1	0	0	0	MDS/MPN	161	27.82	143	24.92	4.2		-9
636	M	43	Unrelated	06/14/2019		08/17/2019	08/17/2019	Dead	1	Infection	64	5	No			Yes	BB Any Yes	BB Before Yes	BB After Yes	b.40-59	White	No	4		1	2.09836	1	2.09836	0	2.09836					Metoprolol	Myeloablative	1	0	0	0	0	Acute Leukemia	241	34.37			4		-11
637	F	56	Unrelated	08/02/2017	09/15/2017	09/15/2017	09/15/2017	Dead	1	Recurrent or Persistent Disease	44	4	No			Unknown	BB Any No	BB Before No	BB After No	b.40-59	White	No	4	1.44262	1	1.44262	1	1.44262	0	1.44262	08/28/2017	1				Myeloablative	1	0	0	0	0	MDS/MPN	121	18.1			4		-8
638	M	61	Unrelated	02/28/2018	05/25/2018	02/27/2020		Followup	0		729	3	No			Unknown	BB Any No	BB Before No	BB After No	c.>=60	White	z.Unknown	3	2.81967	0	23.9016	0	23.9016	0	23.9016						Reduced Intensity	0	0	1	0	0	Lymphoma	146	22.13	142	21	4		-8
639	F	55	Unrelated	06/06/2019	07/23/2019	07/26/2019	07/26/2019	Dead	1	Recurrent or Persistent Disease	50	2	No			Yes	BB Any No	BB Before No	BB After No	b.40-59	Black	No	2	1.54098	1	1.63934	1	1.63934	0	1.63934	07/05/2019	3				Myeloablative	0	0	1	0	0	Acute Leukemia	166	28.62			2.8	L	-10
640	M	64	Related	07/06/2017	10/20/2017	12/02/2019		Followup	0		879	1	No			Yes	BB Any Yes	BB Before No	BB After Yes	c.>=60	White	No	1	3.47541	0	28.8197	0	28.8197	0	28.8197						Myeloablative	1	0	0	0	0	Acute Leukemia	214	28.93	203	27.62	3.4	L	-10
641	M	43	Related	07/18/2017	10/19/2017	07/26/2018		Followup	0		373	2	No			Yes	BB Any Yes	BB Before No	BB After Yes	b.40-59	White	No	2	3.04918	0	12.2295	0	12.2295	0	12.2295	08/07/2017	2	04/25/2019	2		Myeloablative	1	0	0	0	0	Acute Leukemia	183	27.13	190	28.13	4		-11
642	M	68	Unrelated	11/15/2017	10/18/2018	04/09/2019	04/09/2019	Dead	1	Recurrent or Persistent Disease	510	2	No			Unknown	BB Any No	BB Before No	BB After No	c.>=60	White	No	2	11.0492	1	16.7213	1	16.7213	0	16.7213	01/08/2018	2	07/02/2018	2		Myeloablative	1	0	0	0	0	MDS/MPN	215	29.93	216	30.31	4		-9
643	M	27	Unrelated	02/23/2018	05/22/2018	03/11/2019		Followup	0		381	2	No			Unknown	BB Any No	BB Before No	BB After No	a.<=39	White	No	2	2.88525	0	12.4918	0	12.4918	0	12.4918	04/04/2018	2				Myeloablative	1	0	0	0	0	Acute Leukemia	241	34.95	229	33.32	4.8		-11
644	M	68	Unrelated	05/07/2019	08/12/2019	10/31/2019		Followup	0		177	1	No			Unknown	BB Any Yes	BB Before Yes	BB After No	c.>=60	White	No	1	3.18033	0	5.80328	0	5.80328	0	5.80328	06/14/2019	2	09/29/2019	2	Propranolol	Non-myeloablative	0	1	0	0	0	MDS/MPN	189	24.35	169	22.6	3.7		-8
645	M	46	Unrelated	08/04/2017	11/02/2017	10/01/2020		Followup	0		1154	2	No			Yes	BB Any No	BB Before No	BB After No	b.40-59	White	No	2	2.95082	0	37.8361	0	37.8361	0	37.8361	08/25/2017	1				Myeloablative	0	0	0	0	1	MDS/MPN	275	36.25	248	32.69	4		-8
646	M	29	Related	09/26/2017	12/29/2017	01/20/2022		Followup	0		1577	0	No			Yes	BB Any No	BB Before No	BB After No	a.<=39	White	No	0	3.08197	0	51.7049	0	51.7049	0	51.7049	10/16/2017	3				Myeloablative	1	0	0	0	0	Acute Leukemia	225	29.17	206	27.26	4.3		-8
647	F	42	Related	07/25/2017	10/26/2017	10/24/2018		Followup	0		456	7	No			Unknown	BB Any No	BB Before No	BB After No	b.40-59	Black	No	4	3.04918	0	14.9508	0	14.9508	0	14.9508	08/10/2017	2				Myeloablative	1	0	0	0	0	Acute Leukemia	193	34.92	177	33.25	3.3	L	-8
648	M	66	Unrelated	10/24/2017	01/29/2018	01/20/2022		Followup	0		1549	1	No			Yes	BB Any Yes	BB Before Yes	BB After Yes	c.>=60	White	No	1	3.18033	0	50.7869	0	50.7869	0	50.7869	11/12/2017	2	07/03/2019	2	Atenolol	Myeloablative	1	0	0	0	0	MDS/MPN	206	29.81	211	30.27	3.6		-8
649	M	59	Related	09/14/2017	01/30/2018	07/28/2021		Followup	0		1413	3	No			Yes	BB Any Yes	BB Before No	BB After No	b.40-59	z.Other/Unknown	No	3	4.52459	0	46.3279	0	46.3279	0	46.3279	10/25/2017	2	04/01/2018	1		Myeloablative	0	0	0	0	1	Acute Leukemia	147	22.55	136	21.31	4.4		-9
650	F	63	Unrelated	01/30/2018	04/18/2018	04/21/2018	04/21/2018	Dead	1	Recurrent or Persistent Disease	81	3	No			Unknown	BB Any No	BB Before No	BB After No	c.>=60	White	No	3	2.55738	1	2.65574	1	2.65574	0	2.65574	03/29/2018	2				Myeloablative	1	0	0	0	0	MDS/MPN	135	21.02	131	19.91	4		-7
651	M	65	Related	12/19/2017	03/15/2018	09/02/2019	09/02/2019	Dead	1	Infection	622	3	No			Unknown	BB Any No	BB Before No	BB After No	c.>=60	White	No	3	2.81967	1	20.3934	1	20.3934	0	20.3934			09/21/2018	2		Myeloablative	1	0	0	0	0	Acute Leukemia	207	26.82	193	25.02	3.9		-12
652	M	63	Unrelated	10/19/2017	01/09/2018	01/12/2018	01/12/2018	Dead	1	GVHD	85	1	No			Yes	BB Any Yes	BB Before No	BB After Yes	c.>=60	White	No	1	2.68852	1	2.78689	1	2.78689	0	2.78689	11/21/2017	3				Reduced Intensity	0	0	0	0	1	MDS/MPN	183	24.25	177	25.4	3.8		-9
653	M	63	Unrelated	09/27/2017	12/21/2017	12/21/2017	12/21/2017	Dead	1	Organ Failure	85	5	No			Yes	BB Any Yes	BB Before No	BB After Yes	c.>=60	White	No	4	2.78689	1	2.78689	1	2.78689	0	2.78689						Myeloablative	0	0	1	0	0	Acute Leukemia	162	22.91	143	20.51	3.3	L	-9
654	M	61	Unrelated	10/18/2017	11/03/2017	11/03/2017	11/03/2017	Dead	1	Infection	16	5	No			Unknown	BB Any No	BB Before No	BB After No	c.>=60	White	No	4	0.52459	1	0.52459	1	0.52459	0	0.52459						Myeloablative	1	0	0	0	0	MDS/MPN	209	29.26			3.7		-9
655	M	33	Related	05/08/2018	07/30/2018	05/24/2019	05/24/2019	Dead	1	Recurrent or Persistent Disease	381	3	Yes	01OCT2018	146	Unknown	BB Any No	BB Before No	BB After No	a.<=39	White	No	3	2.72131	1	12.4918	0	4.78689	1	4.78689						Myeloablative	1	0	0	0	0	Acute Leukemia	263	41.22	252	39.4	3.3	L	-8
656	M	44	Unrelated	11/29/2017	02/23/2018	11/29/2018		Followup	0		365	4	No			Unknown	BB Any No	BB Before No	BB After No	b.40-59	Black	No	4	2.81967	0	11.9672	0	11.9672	0	11.9672	01/19/2018	2				Myeloablative	0	0	1	0	0	Chronic Leukemia	199	27.53	165	23.09	4		-9
657	F	46	Unrelated	12/13/2017	03/15/2018	12/20/2018		Followup	0		372	3	No			Unknown	BB Any No	BB Before No	BB After No	b.40-59	Black	No	3	3.01639	0	12.1967	0	12.1967	0	12.1967	01/10/2018	2	04/23/2018	1		Myeloablative	0	0	1	0	0	MDS/MPN	203	33.76	168	26.34	3.4	L	-10
658	F	56	Unrelated	12/29/2017	04/05/2018	01/08/2019		Followup	0		375	3	No			Unknown	BB Any No	BB Before No	BB After No	b.40-59	White	No	3	3.18033	0	12.2951	0	12.2951	0	12.2951	01/29/2018	2				Reduced Intensity	0	1	0	0	0	Other	211	39.41	196	37.03	4.1		-9
659	M	47	Unrelated	02/22/2019	06/05/2019	01/20/2022		Followup	0		1063	6	No			Yes	BB Any Yes	BB Before Yes	BB After Yes	b.40-59	White	No	4	3.37705	0	34.8525	0	34.8525	0	34.8525			12/31/2019	2	Metoprolol	Myeloablative	1	0	0	0	0	Acute Leukemia	185	26.1	174	24.99	2.8	L	-11
660	F	35	Related	03/28/2018	07/27/2018	03/28/2019		Followup	0		365	2	No			Unknown	BB Any No	BB Before No	BB After No	a.<=39	z.Other/Unknown	No	2	3.96721	0	11.9672	0	11.9672	0	11.9672	07/09/2018	1	05/30/2019	1		Myeloablative	0	1	0	0	0	Other	114	21.46	103	18.99	4		-8
661	F	57	Related	11/21/2017	04/27/2018	08/15/2018	08/15/2018	Dead	1	Recurrent or Persistent Disease	267	3	Yes	13FEB2018	84	Yes	BB Any Yes	BB Before Yes	BB After No	b.40-59	White	No	3	5.14754	1	8.7541	0	2.7541	1	2.7541	12/19/2017	1	08/14/2018	1	Metoprolol	Myeloablative	1	0	0	0	0	MDS/MPN	167	23.59	156	21.77	4.1		-8
662	M	64	Related	05/16/2019	08/05/2019	09/30/2019	09/30/2019	Dead	1	Recurrent or Persistent Disease	137	2	No			Unknown	BB Any No	BB Before No	BB After No	c.>=60	White	z.Unknown	2	2.65574	1	4.4918	1	4.4918	0	4.4918	07/25/2019	2				Non-myeloablative	0	1	0	0	0	Lymphoma	172	25.88	157	24.05	4.1		-9
663	M	53	Unrelated	01/18/2018	03/09/2018	01/31/2019		Followup	0		378	3	No			Unknown	BB Any No	BB Before No	BB After No	b.40-59	z.Other/Unknown	z.Unknown	3	1.63934	0	12.3934	0	12.3934	0	12.3934	06/12/2018	1	01/14/2021	1		Non-myeloablative	0	1	0	0	0	Lymphoma	168	22.94	163	22.53	4.5		-7
664	M	63	Unrelated	03/01/2018	06/18/2018	06/18/2018	06/18/2018	Dead	1	Organ Failure	109	4	No			Yes	BB Any Yes	BB Before Yes	BB After Yes	c.>=60	White	No	4	3.57377	1	3.57377	1	3.57377	0	3.57377					Metoprolol	Myeloablative	1	0	0	0	0	MDS/MPN	212	31.3	198	28.44	3.4	L	-8
665	M	52	Related	01/31/2018	04/12/2018	11/22/2021		Followup	0		1391	2	No			Yes	BB Any No	BB Before No	BB After No	b.40-59	White	No	2	2.32787	0	45.6066	0	45.6066	0	45.6066	03/05/2018	1				Myeloablative	0	1	0	0	0	Acute Leukemia	208	28.22	193	26.42	4.2		-8
666	M	65	Unrelated	03/06/2018	06/05/2018	12/09/2018	12/09/2018	Dead	1	Recurrent or Persistent Disease	278	4	Yes	16OCT2018	224	Unknown	BB Any No	BB Before No	BB After No	c.>=60	White	No	4	2.98361	1	9.11475	0	7.34426	1	7.34426	04/09/2018	2	10/16/2018	1		Myeloablative	1	0	0	0	0	MDS/MPN	159	24.44	139	21.19	3.8		-7
667	M	63	Related	02/20/2018	05/10/2018	01/24/2022		Followup	0		1434	5	No			Yes	BB Any No	BB Before No	BB After No	c.>=60	Black	No	4	2.59016	0	47.0164	0	47.0164	0	47.0164			01/10/2019	2		Myeloablative	1	0	0	0	0	MDS/MPN	169	28.17	159	25.69	3.9		-8
668	F	59	Unrelated	02/27/2018	05/23/2018	05/23/2018	05/23/2018	Dead	1	GVHD	85	4	No			Unknown	BB Any No	BB Before No	BB After No	b.40-59	Black	No	4	2.78689	1	2.78689	1	2.78689	0	2.78689	04/02/2018	4				Myeloablative	1	0	0	0	0	Chronic Leukemia	131	22.36			3.4	L	-8
669	M	45	Related	02/14/2019	06/07/2019	08/09/2019		Followup	0		176	4	No			Unknown	BB Any Yes	BB Before Yes	BB After Yes	b.40-59	White	No	4	3.70492	0	5.77049	0	5.77049	0	5.77049					Metoprolol	Non-myeloablative	0	1	0	0	0	Lymphoma	152	21.37	157	23.92	3.9		-13
670	M	58	Related	05/02/2018	07/30/2018	06/25/2019	06/25/2019	Dead	1	Infection	419	3	Yes	15OCT2018	166	Yes	BB Any No	BB Before No	BB After No	b.40-59	White	No	3	2.91803	1	13.7377	0	5.44262	1	5.44262	06/04/2018	2	01/08/2019	2		Myeloablative	1	0	0	0	0	Acute Leukemia	193	26.16	176	23.92	4		-9
671	F	61	Related	03/16/2018	06/28/2018	03/09/2021		Followup	0		1089	3	No			Yes	BB Any Yes	BB Before No	BB After Yes	c.>=60	Black	No	3	3.40984	0	35.7049	0	35.7049	0	35.7049						Myeloablative	1	0	0	0	0	MDS/MPN	132	23.95	129	22.61	3	L	-10
672	F	60	Related	07/18/2018	11/05/2018	11/05/2018	11/05/2018	Dead	1	Infection	110	3	No			Yes	BB Any Yes	BB Before Yes	BB After Yes	c.>=60	Black	No	3	3.60656	1	3.60656	1	3.60656	0	3.60656	08/24/2018	3			Metoprolol	Non-myeloablative	1	0	0	0	0	Lymphoma	142	23.58			3.7		-7
673	F	38	Unrelated	03/28/2018	06/25/2018	11/08/2019	11/08/2019	Dead	1	Recurrent or Persistent Disease	590	3	No			Unknown	BB Any No	BB Before No	BB After No	a.<=39	White	Yes	3	2.91803	1	19.3443	1	19.3443	0	19.3443						Myeloablative	1	0	0	0	0	MDS/MPN	163	28.55	159	27.14	4		-9
674	F	26	Unrelated	03/21/2018	06/19/2018	03/25/2019		Followup	0		369	2	No			Unknown	BB Any No	BB Before No	BB After No	a.<=39	White	No	2	2.95082	0	12.0984	0	12.0984	0	12.0984	04/11/2018	2				Myeloablative	1	0	0	0	0	Acute Leukemia	165	26.04	160	25.83	3.5		-9
675	F	68	Unrelated	03/21/2018	06/15/2018	11/26/2019		Followup	0		615	3	No			Unknown	BB Any No	BB Before No	BB After No	c.>=60	White	No	3	2.81967	0	20.1639	0	20.1639	0	20.1639	05/14/2018	2				Reduced Intensity	0	1	0	0	0	Acute Leukemia	121	22.21	112	20.44	3.9		-12
676	M	68	Related	07/31/2018	10/18/2018	07/08/2019		Followup	0		342	3	No			Unknown	BB Any No	BB Before No	BB After No	c.>=60	z.Other/Unknown	Yes	3	2.59016	0	11.2131	0	11.2131	0	11.2131	08/27/2018	1	12/09/2019	3		Myeloablative	1	0	0	0	0	MDS/MPN	174	25.71	170	27.58	3.7		-11
677	F	49	Unrelated	06/20/2018	09/19/2018	06/21/2019		Followup	0		366	1	No			Yes	BB Any No	BB Before No	BB After No	b.40-59	White	No	1	2.98361	0	12	0	12	0	12			03/01/2019	2		Myeloablative	1	0	0	0	0	Acute Leukemia	142	22.32	145	22.03	4		-9
678	F	55	Related	06/12/2018	09/07/2018	06/21/2019		Followup	0		374	2	No			Yes	BB Any Yes	BB Before Yes	BB After Yes	b.40-59	White	No	2	2.85246	0	12.2623	0	12.2623	0	12.2623	08/01/2018	1			Carvedilol	Myeloablative	1	0	0	0	0	Other	197	37.37	171	32.28	4.6		-6
679	F	32	Unrelated	03/13/2019	10/01/2019	09/08/2019		Followup	0		179	3	No			Yes	BB Any Yes	BB Before No	BB After Yes	a.<=39	White	No	3	6.62295	0	5.86885	0	5.86885	0	5.86885	05/20/2019	2	10/07/2019	2		Myeloablative	1	0	0	0	0	Lymphoma	128	25.06	121	23.68	4.6		-9
680	M	61	Unrelated	03/26/2019	06/07/2019	09/20/2019	02/16/2021	Followup	0	Recurrent or Persistent Disease	178	2	No			No	BB Any Yes	BB Before No	BB After Yes	c.>=60	White	No	2	2.39344	0	5.83607	0	5.83607	0	5.83607			09/19/2019	2		Myeloablative	1	0	0	0	0	Lymphoma	299	43.96	274	38.3	3.7		-12
681	F	46	Related	02/12/2020	04/20/2020	02/12/2020		Followup	0		0	1	No			Yes	BB Any Yes	BB Before Yes	BB After Yes	b.40-59	White	No	1	2.22951	0	0	0	0	0	0			01/13/2021	2	Carvedilol	Myeloablative	1	0	0	0	0	Acute Leukemia	276	47.05	267	47.34	3.5		-8
682	F	52	Unrelated	10/13/2018	01/24/2019	03/02/2020		Followup	0		506	3	No			Yes	BB Any Yes	BB Before Yes	BB After Yes	b.40-59	White	No	3	3.37705	0	16.5902	0	16.5902	0	16.5902	11/21/2018	2	05/28/2019	2	Metoprolol	Myeloablative	1	0	0	0	0	Acute Leukemia	117	18.83	109	17.61	3.1	L	-12
683	F	60	Unrelated	09/05/2018	10/24/2018	10/31/2018	10/31/2018	Dead	1	Recurrent or Persistent Disease	56	7	No			Yes	BB Any No	BB Before No	BB After No	c.>=60	White	No	4	1.60656	1	1.83607	1	1.83607	0	1.83607	10/20/2018	2				Myeloablative	1	0	0	0	0	MDS/MPN	110	18.87			4.4		-9
684	M	67	Unrelated	11/15/2018	01/18/2019	05/23/2019		Followup	0		189	5	No			Unknown	BB Any No	BB Before No	BB After No	c.>=60	White	No	4	2.09836	0	6.19672	0	6.19672	0	6.19672						Non-myeloablative	0	1	0	0	0	Chronic Leukemia	274	34.28	256	33.02	4.3		-9
685	M	35	Related	01/09/2019	06/04/2019	07/11/2019		Followup	0		183	4	No			No	BB Any Yes	BB Before No	BB After Yes	a.<=39	Black	No	4	4.78689	0	6	0	6	0	6	02/04/2019	1	06/13/2019	1		Myeloablative	0	1	0	0	0	Lymphoma	191	26.03	166	22.57	4.2		-13
686	M	68	Related	06/13/2018	07/12/2018	07/12/2018	07/12/2018	Dead	1	Infection	29	2	No			Yes	BB Any No	BB Before No	BB After Yes	c.>=60	White	No	2	0.95082	1	0.95082	1	0.95082	0	0.95082						Reduced Intensity	1	0	0	0	0	Acute Leukemia	177	26.71			3.3	L	-8
687	M	68	Related	02/20/2020	05/19/2020	03/25/2020		Followup	0		34	3	No			Yes	BB Any Yes	BB Before Yes	BB After Yes	c.>=60	White	No	3	2.91803	0	1.11475	0	1.11475	0	1.11475					Carvedilol	Myeloablative	0	1	0	0	0	MDS/MPN	174	23.59	162	22.65	3.5		-10
688	M	64	Unrelated	10/24/2018	01/24/2019	04/25/2019	11/13/2021	Followup	0	Recurrent or Persistent Disease	183	1	No			No	BB Any No	BB Before No	BB After No	c.>=60	White	No	1	3.01639	0	6	0	6	0	6	11/28/2018	2	07/20/2019	2		Myeloablative	0	1	0	0	0	Acute Leukemia	242	31.01	215	27.53	4.5		-9
689	M	35	Related	05/22/2018	09/06/2018	03/09/2020		Followup	0		657	5	No			Unknown	BB Any No	BB Before No	BB After No	a.<=39	Black	No	4	3.5082	0	21.541	0	21.541	0	21.541						Myeloablative	1	0	0	0	0	Acute Leukemia	344	45.58	341	45.01	3.8		-8
690	M	25	Unrelated	11/01/2018	07/08/2019	03/31/2020		Followup	0		516	3	No			Yes	BB Any Yes	BB Before No	BB After Yes	a.<=39	Black	No	3	8.16393	0	16.918	0	16.918	0	16.918						Non-myeloablative	1	0	0	0	0	Other	133	22.12	133	23.59	4.6		-10
691	F	61	Related	04/25/2019	07/08/2019	06/11/2019		Followup	0		47	3	No			Unknown	BB Any No	BB Before No	BB After No	c.>=60	Black	No	3	2.42623	0	1.54098	0	1.54098	0	1.54098			02/11/2020	2		Myeloablative	1	0	0	0	0	Chronic Leukemia	136	25.71	126	23.35	4.8		-10
692	M	57	Unrelated	11/21/2019		12/17/2019	12/17/2019	Dead	1	Organ Failure	26	0	No			Yes	BB Any No	BB Before No	BB After No	b.40-59	White	No	0		1	0.852459	1	0.852459	0	0.852459						Myeloablative	1	0	0	0	0	MDS/MPN	214	29.9			3.6		-8
693	M	34	Unrelated	09/05/2018	12/07/2018	09/09/2019		Followup	0		369	6	No			Unknown	BB Any No	BB Before No	BB After No	a.<=39	Black	No	4	3.04918	0	12.0984	0	12.0984	0	12.0984	09/30/2018	3	11/22/2018	2		Myeloablative	0	0	0	0	1	Acute Leukemia	293	42.9	246	35.37	3.3	L	-10
694	M	48	Related	08/24/2018	11/12/2018	08/27/2019		Followup	0		368	3	No			Unknown	BB Any No	BB Before No	BB After No	b.40-59	White	No	3	2.62295	0	12.0656	0	12.0656	0	12.0656	11/01/2018	2				Non-myeloablative	0	1	0	0	0	Lymphoma	269	36.14	255	35.62	3.9		-8
695	F	57	Related	07/10/2018	10/22/2018	01/06/2019	01/06/2019	Dead	1	GVHD	180	2	No			Unknown	BB Any No	BB Before No	BB After No	b.40-59	White	No	2	3.40984	1	5.90164	1	5.90164	0	5.90164	09/05/2018	2	10/12/2018	2		Non-myeloablative	0	1	0	0	0	Lymphoma	139	22.73	110	18.31	4.1		-13
696	F	63	Related	03/26/2019	05/17/2019	07/18/2019		Followup	0		114	1	No			Unknown	BB Any No	BB Before No	BB After No	c.>=60	Black	No	1	1.70492	0	3.7377	0	3.7377	0	3.7377						Myeloablative	0	1	0	0	0	Lymphoma	162	24.24	154	24.01	4.2		-11
697	M	49	Unrelated	11/14/2018	02/04/2019	06/03/2019		Followup	0		201	4	No			Yes	BB Any Yes	BB Before No	BB After Yes	b.40-59	White	No	4	2.68852	0	6.59016	0	6.59016	0	6.59016			06/03/2019	2		Myeloablative	1	0	0	0	0	Acute Leukemia	173	26.97	169	26.41	4.1		-9
698	M	63	Unrelated	11/15/2018	02/06/2019	02/08/2019	02/08/2019	Dead	1	Organ Failure	85	2	No			Unknown	BB Any No	BB Before No	BB After No	c.>=60	White	No	2	2.72131	1	2.78689	1	2.78689	0	2.78689	12/29/2018	3				Reduced Intensity	1	0	0	0	0	MDS/MPN	189	28.6			4.3		-10
699	M	20	Unrelated	09/12/2018	02/26/2019	10/21/2019		Followup	0		404	4	No			Yes	BB Any Yes	BB Before Yes	BB After Yes	a.<=39	z.Other/Unknown	Yes	4	5.47541	0	13.2459	0	13.2459	0	13.2459					Metoprolol	Myeloablative	0	0	1	0	0	Acute Leukemia	175	26.66	156	24.38	4		-9
700	M	53	Unrelated	11/21/2018	02/14/2019	05/20/2019	09/10/2020	Followup	0	Infection	180	4	No			Yes	BB Any No	BB Before No	BB After No	b.40-59	White	No	4	2.78689	0	5.90164	0	5.90164	0	5.90164	12/12/2018	1	08/23/2019	2		Myeloablative	1	0	0	0	0	MDS/MPN	195	24.51	188	30.42	3.7		-9
701	M	35	Related	09/25/2018	12/04/2018	03/19/2019		Followup	0		175	3	No			Unknown	BB Any No	BB Before No	BB After No	a.<=39	White	No	3	2.29508	0	5.7377	0	5.7377	0	5.7377						Reduced Intensity	0	1	0	0	0	Chronic Leukemia	178	28.52	172	27.73	4		-7
702	F	65	Unrelated	04/01/2019	05/13/2019	05/13/2019	05/13/2019	Dead	1	Organ Failure	42	5	No			Yes	BB Any Yes	BB Before Yes	BB After Yes	c.>=60	White	No	4	1.37705	1	1.37705	1	1.37705	0	1.37705					Metoprolol	Myeloablative	1	0	0	0	0	MDS/MPN	116	21.02			3.7		-10
703	M	58	Unrelated	10/25/2018	02/08/2019	10/24/2019		Followup	0		364	4	No			Yes	BB Any No	BB Before No	BB After No	b.40-59	White	No	4	3.47541	0	11.9344	0	11.9344	0	11.9344	11/25/2018	2	01/08/2019	2		Myeloablative	1	0	0	0	0	MDS/MPN	262	36.64	213	29.43	4.8		-10
704	M	27	Unrelated	10/30/2018	12/01/2018	02/25/2019	02/25/2019	Dead	1	Recurrent or Persistent Disease	118	7	No			Unknown	BB Any No	BB Before No	BB After No	a.<=39	Black	No	4	1.04918	1	3.86885	1	3.86885	0	3.86885						Non-myeloablative	0	0	1	0	0	Acute Leukemia	156	21.61			3.8		-12
705	M	60	Unrelated	02/07/2019	05/07/2019	07/18/2019		Followup	0		161	1	No			Yes	BB Any No	BB Before No	BB After No	c.>=60	White	No	1	2.91803	0	5.27869	0	5.27869	0	5.27869	03/22/2019	2	08/11/2020	2		Reduced Intensity	0	1	0	0	0	Lymphoma	156	22.57	139	19.93	3.8		-14
706	F	61	Related	10/10/2018	01/11/2019	10/14/2019		Followup	0		369	1	No			Unknown	BB Any No	BB Before No	BB After No	c.>=60	White	z.Unknown	1	3.04918	0	12.0984	0	12.0984	0	12.0984			07/17/2019	2		Myeloablative	1	0	0	0	0	MDS/MPN	184	31.62	162	28.01	4.3		-9
707	M	56	Related	10/30/2018	01/31/2019	12/13/2019		Followup	0		409	1	No			Unknown	BB Any No	BB Before No	BB After No	b.40-59	White	No	1	3.04918	0	13.4098	0	13.4098	0	13.4098	11/28/2018	2	06/14/2019	2		Myeloablative	1	0	0	0	0	Chronic Leukemia	221	29.12	198	26.81	4.2		-13
708	F	57	Related	03/20/2019	07/15/2019	07/28/2019	07/28/2019	Dead	1	Recurrent or Persistent Disease	130	3	No			Unknown	BB Any No	BB Before No	BB After No	b.40-59	White	No	3	3.83607	1	4.2623	1	4.2623	0	4.2623	07/08/2019	1				Myeloablative	1	0	0	0	0	Acute Leukemia	166	28.07	167	27.94	3.9		-9
709	F	48	Unrelated	03/13/2019	06/14/2019	09/06/2019		Followup	0		177	2	No			Unknown	BB Any No	BB Before No	BB After No	b.40-59	White	No	2	3.04918	0	5.80328	0	5.80328	0	5.80328	04/08/2019	2	12/17/2019	2		Myeloablative	1	0	0	0	0	MDS/MPN	176	31.93	152	27.08	4.3		-9
710	M	20	Unrelated	11/09/2018	01/28/2019	05/10/2019		Followup	0		182	3	No			Unknown	BB Any No	BB Before No	BB After No	a.<=39	White	No	3	2.62295	0	5.96721	0	5.96721	0	5.96721	04/18/2019	1	06/14/2019	2		Non-myeloablative	0	0	0	1	0	Other	149	20.27	141	20.2	4.3		-11
711	M	65	Related	09/26/2019	12/27/2019	10/18/2019		Followup	0		22	5	No			Yes	BB Any Yes	BB Before No	BB After Yes	c.>=60	Black	No	4	3.01639	0	0.721311	0	0.721311	0	0.721311	11/15/2019	2	01/21/2020	2		Myeloablative	0	1	0	0	0	MDS/MPN	189	28.7	190	28.86	3.4	L	-9
712	M	59	Related	10/09/2018	12/28/2018	05/04/2020		Followup	0		573	7	No			Yes	BB Any Yes	BB Before Yes	BB After No	b.40-59	White	z.Unknown	4	2.62295	0	18.7869	0	18.7869	0	18.7869			04/18/2019	1	Metoprolol	Myeloablative	1	0	0	0	0	Acute Leukemia	196	28.73	183	26.56	3.6		-7
713	M	19	Related	11/02/2018	10/08/2019	05/06/2019		Followup	0		185	0	No			Unknown	BB Any No	BB Before No	BB After No	a.<=39	White	No	0	11.1475	0	6.06557	0	6.06557	0	6.06557	05/20/2019	3	10/09/2019	2		Myeloablative	1	0	0	0	0	Acute Leukemia	122	17.1	131	18.9	4.6		-8
714	F	52	Unrelated	12/05/2018	03/01/2019	06/03/2019		Followup	0		180	5	No			Unknown	BB Any No	BB Before No	BB After No	b.40-59	White	z.Unknown	4	2.81967	0	5.90164	0	5.90164	0	5.90164			12/04/2019	2		Myeloablative	0	0	1	0	0	MDS/MPN	146	22.54	121	18.7	3.5		-9
715	F	26	Related	01/29/2020	05/15/2020	03/14/2020		Followup	0		45	1	No			No	BB Any Yes	BB Before Yes	BB After Yes	a.<=39	White	No	1	3.5082	0	1.47541	0	1.47541	0	1.47541					Metoprolol	Non-myeloablative	0	1	0	0	0	Lymphoma	273	39.13	259	37.97	3.3	L	-13
716	M	67	Related	02/19/2019	05/20/2019	08/22/2019	06/18/2023	Followup	0		184	2	No			Yes	BB Any Yes	BB Before Yes	BB After Yes	c.>=60	White	No	2	2.95082	0	6.03279	0	6.03279	0	6.03279	03/13/2019	1	08/08/2019	2	Atenolol	Myeloablative	1	0	0	0	0	MDS/MPN	176	24.94	173	24.81	4		-7
717	F	38	Related	03/27/2019		08/12/2019	08/12/2019	Dead	1	Recurrent or Persistent Disease	138	5	No			Yes	BB Any Yes	BB Before No	BB After Yes	a.<=39	Black	No	4		1	4.52459	1	4.52459	0	4.52459	05/20/2019	2				Non-myeloablative	0	1	0	0	0	MDS/MPN	182	30.3	116	19.3	2.4	L	-10
718	M	37	Unrelated	04/09/2019	11/04/2019	12/05/2019		Followup	0		240	4	No			Yes	BB Any Yes	BB Before Yes	BB After No	a.<=39	White	No	4	6.85246	0	7.86885	0	7.86885	0	7.86885	05/19/2019	2	08/11/2020	2	Metoprolol	Myeloablative	1	0	0	0	0	Acute Leukemia	175	23.17	151	19.94	3.4	L	-8
719	M	50	Related	10/26/2018	01/24/2019	10/23/2019		Followup	0		362	4	No			Yes	BB Any No	BB Before No	BB After No	b.40-59	White	No	4	2.95082	0	11.8689	0	11.8689	0	11.8689	12/28/2018	1	02/12/2019	2		Myeloablative	0	1	0	0	0	Acute Leukemia	143	21.47	154	23.36	2.6	L	-10
720	M	66	Related	02/12/2019	04/29/2019	09/14/2019	09/14/2019	Dead	1	GVHD	214	3	No			Unknown	BB Any No	BB Before No	BB After No	c.>=60	White	No	3	2.4918	1	7.01639	1	7.01639	0	7.01639	03/11/2019	1				Myeloablative	1	0	0	0	0	Acute Leukemia	221	35.79	212	35.12	4		-11
721	F	63	Unrelated	01/22/2019	04/23/2019	01/10/2020	01/10/2020	Dead	1	Recurrent or Persistent Disease	353	5	No			Yes	BB Any Yes	BB Before Yes	BB After Yes	c.>=60	White	No	4	2.98361	1	11.5738	1	11.5738	0	11.5738					Metoprolol	Reduced Intensity	1	0	0	0	0	Acute Leukemia	145	24.93	127	22.57	4.2		-6
722	M	33	Unrelated	03/13/2019	06/18/2019	04/20/2020		Followup	0		404	5	No			Yes	BB Any Yes	BB Before Yes	BB After Yes	a.<=39	White	No	4	3.18033	0	13.2459	0	13.2459	0	13.2459	04/01/2019	2			Metoprolol	Myeloablative	1	0	0	0	0	Acute Leukemia	161	23.43	153	21.92	3.6		-9
723	M	45	Unrelated	05/01/2019	08/08/2019	10/31/2019		Followup	0		183	3	No			Yes	BB Any Yes	BB Before Yes	BB After Yes	b.40-59	White	No	3	3.2459	0	6	0	6	0	6					Metoprolol	Myeloablative	0	1	0	0	0	Lymphoma	236	32.95	243	33.88	4.6		-8
724	M	69	Unrelated	02/05/2019	05/07/2019	02/10/2020		Followup	0		370	2	No			Unknown	BB Any No	BB Before No	BB After No	c.>=60	White	No	2	2.98361	0	12.1311	0	12.1311	0	12.1311	03/21/2019	2	11/26/2019	2		Myeloablative	1	0	0	0	0	MDS/MPN	205	29.42	164	24.26	4		-8
725	F	65	Unrelated	04/16/2019		05/15/2019	05/15/2019	Dead	1	Infection	29	6	No			Yes	BB Any Yes	BB Before No	BB After Yes	c.>=60	White	z.Unknown	4		1	0.95082	1	0.95082	0	0.95082	05/03/2019	3				Myeloablative	1	0	0	0	0	MDS/MPN	143	22.68			3.7		-8
726	M	46	Related	11/14/2019	02/04/2020	05/14/2020		Followup	0		182	3	No			Unknown	BB Any No	BB Before No	BB After No	b.40-59	Black	No	3	2.68852	0	5.96721	0	5.96721	0	5.96721			11/16/2020	2		Myeloablative	1	0	0	0	0	MDS/MPN	238	35.23	220	33.39	4.2		-10
727	M	53	Unrelated	05/30/2019	12/16/2019	12/16/2019	12/16/2019	Dead	1	Organ Failure	200	2	No			Unknown	BB Any No	BB Before No	BB After No	b.40-59	White	No	2	6.55738	1	6.55738	1	6.55738	0	6.55738	06/19/2019	3				Myeloablative	1	0	0	0	0	MDS/MPN	260	35.15	231	31.31	3.3	L	-9
728	M	41	Related	03/20/2019	06/07/2019	09/12/2019		Followup	0		176	3	No			No	BB Any Yes	BB Before No	BB After Yes	b.40-59	z.Other/Unknown	No	3	2.59016	0	5.77049	0	5.77049	0	5.77049	04/29/2019	2				Myeloablative	1	0	0	0	0	Other	261	37.48	244	34.99	4.1		-12
729	M	64	Unrelated	08/01/2019	10/24/2019	09/02/2019		Followup	0		32	2	No			Yes	BB Any No	BB Before No	BB After No	c.>=60	White	No	2	2.7541	0	1.04918	0	1.04918	0	1.04918	09/16/2019	1				Myeloablative	0	1	0	0	0	Acute Leukemia	212	31.27	209	32.35	4		-10
730	M	38	Unrelated	05/01/2019	08/02/2019	10/30/2019		Followup	0		182	2	No			Yes	BB Any Yes	BB Before No	BB After Yes	a.<=39	z.Other/Unknown	z.Unknown	2	3.04918	0	5.96721	0	5.96721	0	5.96721	07/22/2019	1	01/08/2020	2		Myeloablative	0	0	1	0	0	Acute Leukemia	239	33.41	210	30.39	4		-10
731	M	56	Unrelated	03/31/2020		03/31/2020	01/06/2021	Followup	0		0	4	No			Yes	BB Any Yes	BB Before No	BB After Yes	b.40-59	White	No	4		0	0	0	0	0	0						Non-myeloablative	0	1	0	0	0	MDS/MPN	190	25.13	202	28.17	5.1	H	-8
732	M	33	Related	07/03/2019	10/08/2019	08/02/2019		Followup	0		30	5	No			Yes	BB Any Yes	BB Before Yes	BB After No	a.<=39	Black	No	4	3.18033	0	0.983607	0	0.983607	0	0.983607					Metoprolol	Myeloablative	0	1	0	0	0	Other	293	37.63	258	35.32	3.8		-8
733	F	50	Related	09/04/2019	11/26/2019	05/13/2020		Followup	0		252	5	No			Yes	BB Any Yes	BB Before Yes	BB After Yes	b.40-59	White	No	4	2.72131	0	8.2623	0	8.2623	0	8.2623					Metoprolol	Reduced Intensity	1	0	0	0	0	Acute Leukemia	210	37.27	212	38.75	4.2		-8
734	F	63	Unrelated	05/04/2020		05/04/2020		Followup	0		0	2	No			No	BB Any No	BB Before No	BB After No	c.>=60	White	z.Unknown	2		0	0	0	0	0	0	06/15/2020	3	11/17/2020	2		Myeloablative	0	0	1	0	0	MDS/MPN	220	31.97	171	25.19	3.7		-7
735	F	37	Related	06/18/2019	09/13/2019	09/30/2019		Followup	0		104	1	No			Yes	BB Any Yes	BB Before No	BB After Yes	a.<=39	White	No	1	2.85246	0	3.40984	0	3.40984	0	3.40984	07/09/2019	2	11/12/2019	2		Myeloablative	1	0	0	0	0	Acute Leukemia	163	28.83	121	22.14	4.3		-8
736	M	63	Unrelated	07/02/2019	09/26/2019	10/10/2019		Followup	0		100	5	No			Unknown	BB Any No	BB Before No	BB After No	c.>=60	White	z.Unknown	4	2.81967	0	3.27869	0	3.27869	0	3.27869	07/26/2019	2	11/15/2019	2		Myeloablative	0	0	1	0	0	Acute Leukemia	175	22.41	155	20.43	4.2		-8
737	M	65	Related	06/26/2019	09/26/2019	04/22/2020		Followup	0		301	6	No			Yes	BB Any Yes	BB Before Yes	BB After Yes	c.>=60	White	No	4	3.01639	0	9.86885	0	9.86885	0	9.86885					Metoprolol	Myeloablative	0	1	0	0	0	Acute Leukemia	248	31.11	225	27.35	4.4		-9
738	F	19	Unrelated	09/18/2019	01/13/2020	04/07/2020		Followup	0		202	1	No			Unknown	BB Any No	BB Before No	BB After No	a.<=39	Black	No	1	3.83607	0	6.62295	0	6.62295	0	6.62295	11/27/2019	2				Myeloablative	0	0	1	0	0	Acute Leukemia	201	39.47	189	35.74	3.3	L	-10
739	F	69	Related	07/25/2019	10/10/2019	02/11/2020		Followup	0		201	4	No			Unknown	BB Any No	BB Before No	BB After No	c.>=60	White	No	4	2.52459	0	6.59016	0	6.59016	0	6.59016	08/23/2019	1				Non-myeloablative	0	1	0	0	0	Acute Leukemia	220	33.86	195	29.63	4.2		-7
740	M	67	Related	09/10/2019	12/10/2019	03/21/2020	03/21/2020	Dead	1		193	3	No			Yes	BB Any No	BB Before No	BB After No	c.>=60	Black	z.Unknown	3	2.98361	1	6.32787	1	6.32787	0	6.32787						Myeloablative	1	0	0	0	0	MDS/MPN	212	29.56	207	28.85	4.5		-7
741	M	37	Unrelated	10/02/2019		10/31/2019		Followup	0		29	3	No			Yes	BB Any No	BB Before No	BB After No	a.<=39	Black	z.Unknown	3		0	0.95082	0	0.95082	0	0.95082	12/04/2019	2	06/29/2020	2		Myeloablative	0	0	1	0	0	Acute Leukemia	204	30.49	186	27.44	3.3	L	-10
742	M	57	Unrelated	10/16/2019	03/19/2020	11/01/2019		Followup	0		16	7	No			Yes	BB Any No	BB Before No	BB After No	b.40-59	White	No	4	5.08197	0	0.52459	0	0.52459	0	0.52459	10/29/2019	2				Reduced Intensity	1	0	0	0	0	Chronic Leukemia	210	28.15	187	23.31	3.8		-7
743	M	69	Related	10/17/2019	01/06/2020	01/07/2020		Followup	0		82	5	No			Unknown	BB Any No	BB Before No	BB After No	c.>=60	White	No	4	2.65574	0	2.68852	0	2.68852	0	2.68852	12/30/2019	1				Non-myeloablative	0	1	0	0	0	Acute Leukemia	179	25.4	178	25.72	3.4	L	-8
744	M	58	Unrelated	11/07/2019	01/30/2020	01/30/2020		Followup	0		84	3	No			No	BB Any No	BB Before No	BB After No	b.40-59	White	No	3	2.7541	0	2.7541	0	2.7541	0	2.7541	11/25/2019	2	01/28/2020	2		Myeloablative	1	0	0	0	0	Acute Leukemia	185	24.72	170	22.4	4.2		-9
745	F	67	Unrelated	11/06/2019	01/31/2020	11/23/2019		Followup	0		17	1	No			Yes	BB Any Yes	BB Before Yes	BB After Yes	c.>=60	White	No	1	2.81967	0	0.557377	0	0.557377	0	0.557377	12/13/2019	1	03/24/2020	2	Metoprolol	Myeloablative	1	0	0	0	0	MDS/MPN	169	32.01	159	29.9	4.1		-8
746	F	51	Unrelated	10/16/2019		01/16/2020	01/16/2020	Dead	1		92	4	No			No	BB Any Yes	BB Before Yes	BB After Yes	b.40-59	z.Other/Unknown	Yes	4		1	3.01639	1	3.01639	0	3.01639	11/07/2019	2			Metoprolol	Myeloablative	0	0	1	0	0	Lymphoma	99	22.96			3.3	L	-10
747	F	68	Related	12/20/2019	03/19/2020	03/12/2020		Followup	0		83	2	No			Unknown	BB Any No	BB Before No	BB After No	c.>=60	White	z.Unknown	2	2.95082	0	2.72131	0	2.72131	0	2.72131			11/06/2020	1		Non-myeloablative	0	1	0	0	0	Lymphoma	155	25.03	134	21.89	4		-8
748	M	75	Related	10/23/2019	01/22/2020	04/09/2020		Followup	0		169	2	No			Unknown	BB Any No	BB Before No	BB After No	c.>=60	White	No	2	2.98361	0	5.54098	0	5.54098	0	5.54098	07/20/2020	1				Non-myeloablative	0	1	0	0	0	Acute Leukemia	165	25.82	140	21.78	4.5		-9
749	F	42	Unrelated	10/17/2019		12/31/2019	12/31/2019	Dead	1	Infection	75	6	No			Yes	BB Any Yes	BB Before No	BB After Yes	b.40-59	Black	z.Unknown	4		1	2.45902	1	2.45902	0	2.45902						Myeloablative	0	1	0	0	0	MDS/MPN	146	24.96			3.7		-10
750	M	50	Unrelated	10/30/2019		12/28/2019	12/30/2019	Dead	1	GVHD	59	2	No			Yes	BB Any Yes	BB Before No	BB After Yes	b.40-59	Black	No	2		1	1.93443	1	1.93443	0	1.93443	11/14/2019	3				Myeloablative	0	0	1	0	0	Acute Leukemia	200	28.66			3.8		-10
751	M	34	Related	01/30/2020	04/15/2020	07/10/2020	07/10/2020	dead	1		162	3	No			Yes	BB Any No	BB Before No	BB After No	a.<=39	Black	No	3	2.4918	1	5.31148	1	5.31148	0	5.31148						Myeloablative	0	1	0	0	0	MDS/MPN	261	34.47	250	33.49	3.9		-9
752	F	68	Unrelated	12/11/2019	03/03/2020	03/20/2020		Followup	0		100	2	No			Unknown	BB Any No	BB Before No	BB After No	c.>=60	White	No	2	2.72131	0	3.27869	0	3.27869	0	3.27869	01/07/2020	1				Myeloablative	1	0	0	0	0	Acute Leukemia	184	31.54	160	28.28	3.8		-8
753	F	61	Unrelated	12/10/2019	03/12/2020	12/14/2021		Followup	0		735	3	No			No	BB Any No	BB Before No	BB After No	c.>=60	White	No	3	3.04918	0	24.0984	0	24.0984	0	24.0984	12/27/2019	2	09/29/2020	2		Myeloablative	1	0	0	0	0	Acute Leukemia	201	27.47	185	26.51	4.2		-8
754	M	66	Unrelated	11/01/2019	01/16/2020	03/09/2020		Followup	0		129	2	No			Unknown	BB Any No	BB Before No	BB After No	c.>=60	z.Other/Unknown	z.Unknown	2	2.4918	0	4.22951	0	4.22951	0	4.22951			02/01/2021	2		Non-myeloablative	0	1	0	0	0	MDS/MPN	138	20.99	146	22.16	3.9		-11
755	M	63	Unrelated	02/05/2020	04/21/2020	03/06/2020		Followup	0		30	7	No			Unknown	BB Any No	BB Before No	BB After No	c.>=60	White	No	4	2.4918	0	0.983607	0	0.983607	0	0.983607	06/30/2020	2	12/08/2020	1		Myeloablative	1	0	0	0	0	MDS/MPN	212	29.63	195	27.31	4		-9
756	M	71	Related	01/07/2020	03/25/2020	01/25/2020		Followup	0		18	2	No			Unknown	BB Any No	BB Before No	BB After No	c.>=60	White	No	2	2.55738	0	0.590164	0	0.590164	0	0.590164			04/03/2020	2		Reduced Intensity	1	0	0	0	0	Acute Leukemia	188	27.79	193	28.6	4.1		-11
757	F	53	Related	11/26/2019	02/20/2020	01/04/2022		Followup	0		770	5	No			Yes	BB Any Yes	BB Before Yes	BB After Yes	b.40-59	White	No	4	2.81967	0	25.2459	0	25.2459	0	25.2459	12/15/2019	1	12/20/2021	1	Metoprolol	Myeloablative	1	0	0	0	0	Lymphoma	228	36.56	204	32.93	3.8		-8
758	F	55	Unrelated	04/30/2020		04/30/2020		Followup	0		0	2	No			Unknown	BB Any No	BB Before No	BB After No	b.40-59	White	No	2		0	0	0	0	0	0						Myeloablative	1	0	0	0	0	Acute Leukemia	130	21.67	98	16.35	4.3		-8
759	F	48	Related	12/31/2019	03/25/2020	02/26/2020	03/28/2020	Dead	1		57	4	No			Yes	BB Any Yes	BB Before Yes	BB After Yes	b.40-59	Black	No	4	2.78689	1	1.86885	1	1.86885	0	1.86885					Carvedilol	Myeloablative	0	1	0	0	0	MDS/MPN	247	39.65			4.6		-10
760	F	57	Unrelated	02/26/2020		08/18/2020	10/24/2020	Dead	1	recurrent disease	174	5	No			Yes	BB Any Yes	BB Before Yes	BB After Yes	b.40-59	White	No	4		1	5.70492	1	5.70492	0	5.70492					Metoprolol	Myeloablative	0	0	1	0	0	MDS/MPN	185	35.05	145	27.88	3.4	L	-10
761	M	64	Unrelated	12/18/2019		03/08/2020	03/08/2020	Dead	1	Recurrent or Persistent Disease	81	5	No			Unknown	BB Any No	BB Before No	BB After No	c.>=60	White	No	4		1	2.65574	1	2.65574	0	2.65574						Non-myeloablative	0	1	0	0	0	MDS/MPN	300	39.74			3.2	L	-9
762	M	32	Unrelated	01/29/2020	04/27/2020	01/29/2020		Followup	0		0	3	No			Unknown	BB Any No	BB Before No	BB After No	a.<=39	z.Other/Unknown	z.Unknown	3	2.91803	0	0	0	0	0	0						Myeloablative	0	1	0	0	0	MDS/MPN	150	21.95	152	22.06	3.6		-8
763	M	72	Unrelated	04/16/2020		04/16/2020		Followup	0		0	3	No			Unknown	BB Any No	BB Before No	BB After No	c.>=60	White	No	3		0	0	0	0	0	0	06/05/2020	2	10/30/2020	1		Myeloablative	0	0	1	0	0	Acute Leukemia	131	19.4	127	19.73	3.6		-10
764	F	54	Related	01/16/2020	03/23/2020	11/30/2021		Followup	0		684	6	No			Yes	BB Any Yes	BB Before Yes	BB After Yes	b.40-59	White	No	4	2.19672	0	22.4262	0	22.4262	0	22.4262	02/26/2020	2			Carvedilol	Reduced Intensity	0	1	0	0	0	Acute Leukemia	151	26.68	149	26.2	3.8		-10
765	M	44	Unrelated	03/06/2020		10/26/2020	11/13/2020	Dead	1	AML	234	3	No			Yes	BB Any No	BB Before No	BB After No	b.40-59	White	z.Unknown	3		1	7.67213	1	7.67213	0	7.67213						Myeloablative	1	0	0	0	0	Acute Leukemia	194	26.8	162	22.01	4		-10
766	M	62	Unrelated	03/10/2020		07/17/2020	08/07/2020	Dead	1	AML, Acute hypoxic respiratory failure, fungal pneumonia, neutropenia	129	5	No			Yes	BB Any Yes	BB Before No	BB After Yes	c.>=60	White	No	4		1	4.22951	1	4.22951	0	4.22951						Non-myeloablative	0	1	0	0	0	Acute Leukemia	248	30.97	231	28.91	4		-8
767	F	56	Unrelated	05/01/2020		01/10/2022		Followup	0		619	3	No			Yes	BB Any Yes	BB Before No	BB After Yes	b.40-59	Black	No	3		0	20.2951	0	20.2951	0	20.2951	07/07/2020	2	04/28/2021	2		Myeloablative	1	0	0	0	0	MDS/MPN	211	35.22	201	33.83	4.1		-9
768	M	67	Related	02/25/2020		05/19/2020		Followup	0		84	2	No			Unknown	BB Any No	BB Before No	BB After No	c.>=60	White	No	2		0	2.7541	0	2.7541	0	2.7541			10/27/2020	2		Non-myeloablative	1	0	0	0	0	Chronic Leukemia	187	27.76	189	29.27	4.4		-12
769	M	34	Related	04/10/2020		01/07/2022		Followup	0		637	5	No			Yes	BB Any Yes	BB Before Yes	BB After Yes	a.<=39	White	No	4		0	20.8852	0	20.8852	0	20.8852			12/10/2020	1	Carvedilol	Myeloablative	0	1	0	0	0	Acute Leukemia	228	37.93	188	31.26	4.2		-9
770	M	62	Related	05/20/2020		01/03/2022		Followup	0		593	2	No			Yes	BB Any No	BB Before No	BB After No	c.>=60	White	No	2		0	19.4426	0	19.4426	0	19.4426	06/20/2020	2	01/25/2021	2		Myeloablative	0	1	0	0	0	Acute Leukemia	187	25.38	185	25.11	3.7		-9
771	F	61	Unrelated	04/14/2020		01/05/2022		Followup	0		631	2	No			No	BB Any No	BB Before No	BB After No	c.>=60	White	No	2		0	20.6885	0	20.6885	0	20.6885	05/03/2020	2	02/03/2021	2		Myeloablative	1	0	0	0	0	Acute Leukemia	131	25.62	113	21.73	3.9		-8
772	M	56	Related	05/19/2020		09/30/2021	10/05/2020	Dead	1	relapsed lymphoma	499	4	No			Yes	BB Any No	BB Before No	BB After No	b.40-59	White	No	4		1	16.3607	1	16.3607	0	16.3607	06/16/2020	2				Myeloablative	1	0	0	0	0	Lymphoma	137	20.87	122	18.57	3.9		-11
773	M	56	Related	05/26/2020		05/26/2020		Followup	0		0	2	No			Unknown	BB Any No	BB Before No	BB After No	b.40-59	White	No	2		0	0	0	0	0	0	10/15/2020	1				Non-myeloablative	0	1	0	0	0	Acute Leukemia	165	22.4	181	24.72	3.7		-8
774	M	74	Related	05/19/2020		11/25/2020	11/29/2020	Dead	1	GVHD	190	1	No			Yes	BB Any No	BB Before No	BB After No	c.>=60	White	No	1		1	6.22951	1	6.22951	0	6.22951	06/17/2020	1	09/22/2020	2		Myeloablative	0	1	0	0	0	Acute Leukemia	212	31.35	198	28.34	3.7		-8
[truncated: 21 more columns]
